# Supplementary material for: Heteroditopic chemosensor to detect γ-hydroxybutyric acid (GHB) in soft drinks and alcoholic beverages
Source: Royal Society of Chemistry journal article supplement (doi:10.1039/d1an01084k), 2021-01-01
Supplement: d1an01084k1.pdf [file d1an01084k1.pdf]

## Supplementary material

### Heteroditopic chemosensor for detecting $\gamma$ -hydroxybutiric acid (GHB) in soft drinks and alcoholic beverages

Silvia Rodríguez-Nuévalos<sup>a</sup>, Margarita Parra<sup>a,b,c</sup>, Salvador Gil<sup>a,b,c</sup>, Pablo Gaviña<sup>a,b,c</sup>, Pau Arroyo<sup>a,b</sup>, José A. Sáez<sup>a,b</sup>, Ana M. Costero<sup>a,b,c\*</sup>

#### Table of contents

|                                                                                                                                                      |    |
|------------------------------------------------------------------------------------------------------------------------------------------------------|----|
| <b>Reported data and comparison</b> .....                                                                                                            | 6  |
| <b>NMR Spectra</b> .....                                                                                                                             | 7  |
| <b>Figure S1.</b> <sup>1</sup> H NMR spectrum of compound <b>1</b> in DMSO- <i>d</i> <sub>6</sub> .....                                              | 7  |
| <b>Figure S2.</b> <sup>13</sup> C NMR spectrum of compound <b>1</b> in DMSO- <i>d</i> <sub>6</sub> .....                                             | 7  |
| <b>Figure S3.</b> NOESY spectrum of compound <b>1</b> in DMSO- <i>d</i> <sub>6</sub> .....                                                           | 8  |
| <b>Figure S4.</b> <sup>1</sup> H NMR spectrum of compound <b>1</b> in THF- <i>d</i> <sub>8</sub> .....                                               | 8  |
| <b>Figure S5.</b> <sup>13</sup> C NMR spectrum of compound <b>1</b> in THF- <i>d</i> <sub>8</sub> .....                                              | 9  |
| <b>Figure S6.</b> NOESY spectrum of compound <b>1</b> in THF- <i>d</i> <sub>8</sub> .....                                                            | 9  |
| <b>Figure S7.</b> <sup>1</sup> H NMR spectrum of compound <b>2</b> in DMSO- <i>d</i> <sub>6</sub> .....                                              | 10 |
| <b>Figure S8.</b> <sup>13</sup> C NMR spectrum of compound <b>2</b> in DMSO- <i>d</i> <sub>6</sub> .....                                             | 10 |
| <b>Figure S9.</b> NOESY spectrum of compound <b>2</b> in DMSO- <i>d</i> <sub>6</sub> .....                                                           | 11 |
| <b>Figure S10.</b> <sup>1</sup> H NMR spectrum of compound <b>2</b> in THF- <i>d</i> <sub>8</sub> .....                                              | 11 |
| <b>Figure S11.</b> <sup>13</sup> C NMR spectrum of compound <b>2</b> in THF- <i>d</i> <sub>8</sub> .....                                             | 12 |
| <b>Figure S12.</b> NOESY spectrum of compound <b>2</b> in THF- <i>d</i> <sub>8</sub> .....                                                           | 12 |
| <b>Mass Spectrometry Spectra</b> .....                                                                                                               | 13 |
| <b>Figure S13.</b> Mass Spectrum of compound <b>1</b> .....                                                                                          | 13 |
| <b>Figure S14.</b> Mass Spectrum of compound <b>2</b> .....                                                                                          | 14 |
| <b>UV-Vis analysis</b> .....                                                                                                                         | 15 |
| <b>Figure S15.</b> Changes observed in UV spectrum of compound <b>2</b> in presence of an excess of NaGHB .....                                      | 15 |
| <b>NMR Analysis</b> .....                                                                                                                            | 16 |
| <b>Figure S16.</b> Changes observed in <sup>1</sup> H NMR spectrum of <b>2</b> in presence of an excess of GHB in DMSO- <i>d</i> <sub>6</sub> .....  | 16 |
| <b>Figure S17.</b> Changes observed in <sup>19</sup> F NMR spectrum of <b>2</b> in presence of an excess of GHB in DMSO- <i>d</i> <sub>6</sub> ..... | 16 |
| <b>UV-Vis titrations spectra</b> .....                                                                                                               | 17 |
| <b>Figure S18.</b> UV-visible spectra of probe <b>2</b> with increasing amounts of GHB (0–10 eq.) in DMSO (10 μM of <b>2</b> ) .....                 | 17 |
| <b>Figure S19.</b> Changes in the absorbance at 485 nm of DMSO solutions of probe <b>2</b> upon the addition of increasing amounts of GHB .....      | 17 |

|                                                                                                                                                                                                                                                               |    |
|---------------------------------------------------------------------------------------------------------------------------------------------------------------------------------------------------------------------------------------------------------------|----|
| <b>Figure S20.</b> UV-visible changes of probe <b>1</b> with increasing amounts of GHB (0–21 eq.) in DMSO:H <sub>2</sub> O 95:5 media (10 μM of <b>1</b> ). .....                                                                                             | 18 |
| <b>Figure S21.</b> UV-visible changes of probe <b>2</b> with increasing amounts of GHB (0–42 eq.) in DMSO:H <sub>2</sub> O 95:5 media (10 μM of <b>2</b> ). .....                                                                                             | 18 |
| <b>Figure S22.</b> Absorbance spectra of <b>2</b> (10 μM in DMSO) in the presence of citric acid, sodium ascorbate, sucrose (in real concentration present in beverages) and NaGHB (1 eq). .....                                                              | 19 |
| <b>Table S2.</b> Recovery and accuracy determination of the method to probe <b>1</b> . Recovery and accuracy of the method were calculated according to reference K. A. Rawat, R.K. Singhal, S. K. Kailasa, <i>RSC Advances</i> , 2016, <b>6</b> , 32025..... | 19 |
| Constant determination .....                                                                                                                                                                                                                                  | 19 |
| <b>ω-hydroxyacids analysis</b> .....                                                                                                                                                                                                                          | 21 |
| NMR essays .....                                                                                                                                                                                                                                              | 21 |
| <b>Figure S23.</b> Changes observed in <sup>1</sup> H NMR spectrum of <b>1</b> in presence of 1 eq. of ω-hydroxyacids of n carbon atoms in DMSO- <i>d</i> <sub>6</sub> .....                                                                                  | 21 |
| <b>Figure S24.</b> Changes observed in <sup>19</sup> F NMR spectrum of <b>1</b> in presence of 1 eq of ω-hydroxyacid in DMSO- <i>d</i> <sub>6</sub> . .....                                                                                                   | 22 |
| UV-Vis essays.....                                                                                                                                                                                                                                            | 22 |
| <b>Figure S25.</b> Changes observed in UV-Vis spectrum of <b>1</b> in presence of 3.3 eq. of ω-hydroxyacids in DMSO. ....                                                                                                                                     | 22 |
| <b>Real Samples Analysis</b> .....                                                                                                                                                                                                                            | 23 |
| <b>Figure S26.</b> Colour changes observed in real samples with compound <b>2</b> (alcoholic drinks)...                                                                                                                                                       | 23 |
| <b>Figure S27.</b> Colour changes observed in real samples with compound <b>2</b> (soft drinks and beverages).....                                                                                                                                            | 23 |
| <b>Figure S28.</b> Changes observed in UV-Vis spectrum of <b>1</b> pure and in presence of spiked rum-cola, spiked vodka, spiked tonic and pure tonic. Sensor 60 μM in DMSO in presence of GHB 0.75 mM in the spiked samples. (percent of water < 5%).....    | 24 |
| <b>Theoretical calculations</b> .....                                                                                                                                                                                                                         | 25 |
| <b>Part 1</b> - Computational methods.....                                                                                                                                                                                                                    | 26 |
| <b>Part 2</b> –X3LYP/6-31G(d)/PCM(DMSO) energy profile of the dihedral bond rotation from Z to E rotamer for both NH-C thiourea bonds (N3H-C, left and N1H-C, right) at the reduced 1-methyl-3-(4-nitrophenyl)thiourea model.....                             | 27 |
| <b>Figure S29.</b> N <sub>3</sub> H-C (left) and N <sub>1</sub> H-C (right) energy profile of the dihedral bond-rotation from Z to E rotamer at 1-methyl-3-(4-nitrophenyl)thiourea. ....                                                                      | 28 |
| <b>Part 3</b> –X3LYP/6-31G(d)/PCM(DMSO) energy profile of the dihedral bond rotation from Z to E rotamer for both NH-C thiourea bonds (N3H-C, left and N1H-C, right) at chemosensor <b>1</b> ..                                                               | 28 |
| <b>Figure S30.</b> N <sub>3</sub> H-C (left) and N <sub>1</sub> H-C (right) energy profile of the dihedral bond-rotation from Z to E rotamer at chemosensor <b>1</b> .....                                                                                    | 28 |
| <b>Part 4</b> –X3LYP/6-31G(d)/PCM(DMSO) energy profile of the dihedral bond rotation from Z to E rotamer for both NH-C thiourea bonds (N3H-C, left and N1H-C, right) at chemosensor <b>2</b> ..                                                               | 28 |

|                                                                                                                                                                                                                                                                                                                                                                                                                                                                                                                                                                                                                                                                                                                                                |    |
|------------------------------------------------------------------------------------------------------------------------------------------------------------------------------------------------------------------------------------------------------------------------------------------------------------------------------------------------------------------------------------------------------------------------------------------------------------------------------------------------------------------------------------------------------------------------------------------------------------------------------------------------------------------------------------------------------------------------------------------------|----|
| <b>Figure S31.</b> N <sub>3</sub> H-C (left) and N <sub>1</sub> H-C (right) energy profile of the dihedral bond-rotation from <i>Z</i> to <i>E</i> rotamer at chemosensor <b>2</b> .....                                                                                                                                                                                                                                                                                                                                                                                                                                                                                                                                                       | 29 |
| <b>Part 5</b> -X3LYP/6-31+G(d,p)/PCM(DMSO) energy and (C=O)-(C=S) distance of the optimized structures of the rotamers found along the full-search of the PES for chemosensor <b>1</b> .....                                                                                                                                                                                                                                                                                                                                                                                                                                                                                                                                                   | 29 |
| <b>Table S3.</b> X3LYP/6-31+G(d,p)/PCM(DMSO) energy ( <i>E</i> , in hartrees), energy difference ( $\Delta E$ , in kcal/mol) with respect to the most stable structure and distance between C=O of trifluoromethyl acetate group and C=S thiourea carbon atoms ( $d_{(C=O)-(C=S)}$ , in angstroms) for the optimized structures of chemosensor <b>1</b> rotamers.....                                                                                                                                                                                                                                                                                                                                                                          | 29 |
| <b>Part 6</b> -X3LYP/6-31+G(d,p)/PCM(DMSO) energy and (C=O)-(C=S) distance of the optimized structures of the rotamers found along the full-search of the PES for chemosensor <b>2</b> .....                                                                                                                                                                                                                                                                                                                                                                                                                                                                                                                                                   | 30 |
| <b>Table S4.</b> X3LYP/6-31+G(d,p)/PCM(DMSO) energy ( <i>E</i> , in hartrees), energy difference ( $\Delta E$ , in kcal/mol) with respect to the most stable structure and distance between C=O of trifluoromethyl acetate group and C=S thiourea carbon atoms ( $d_{(C=O)-(C=S)}$ , in angstroms) for the optimized structures of chemosensor <b>2</b> rotamers.....                                                                                                                                                                                                                                                                                                                                                                          | 30 |
| <b>Part 7</b> -Simulated UV-Vis spectra of selected optimized geometries of rotamers of <b>1</b> . ....                                                                                                                                                                                                                                                                                                                                                                                                                                                                                                                                                                                                                                        | 31 |
| <b>Figure S32.</b> Simulated UV-Vis spectra from the TD-DFT vertical excitation energies analysis of selected X3LYP/6-31+G(d,p)/PCM(DMSO) optimized geometries of rotamers of <b>1</b> at the same theory level (15 states, singlets only). Please, note that the main band is centered around 340-350 nm and that whenever N <sub>3</sub> H-C thiourea bond adopts an <i>E</i> conformation (see <b>1-conf12</b> and <b>1-conf20</b> ), a shoulder at 390 nm appears, which is not seen at the experimental UV-Vis spectra, fact that agrees with the appearance of <i>Z,Z</i> - rotamers (the ones that enables chemosensors to establish readily an effective hydrogen-bond interaction with the carboxylate of GHB) as the main ones. .... | 31 |
| <b>Part 8</b> -Simulated UV-Vis spectra of selected optimized geometries of rotamers of <b>2</b> . ....                                                                                                                                                                                                                                                                                                                                                                                                                                                                                                                                                                                                                                        | 32 |
| <b>Figure S33.</b> Simulated UV-Vis spectra from the TD-DFT vertical excitation energies analysis of selected X3LYP/6-31+G(d,p)/PCM(DMSO) optimized geometries of rotamers of <b>2</b> at the same theory level (15 states, singlets only). Please, note that the main band is centered around 340-350 nm and that whenever N <sub>3</sub> H-C thiourea bond adopts an <i>E</i> conformation (see <b>1-conf14</b> and <b>1-conf22</b> ), a shoulder at 390 nm appears, which is not seen at the experimental UV-Vis spectra, fact that agrees with the appearance of <i>Z,Z</i> - rotamers (the ones that enables chemosensors to establish readily an effective hydrogen-bond interaction with the carboxylate of GHB) as the main ones. .... | 32 |
| <b>Part 9</b> - X3LYP/6-31+G(d,p)/PCM(DMSO) energies of the optimized structures of 1-GHB derivatives with hydrogen bonds between the thiourea and carboxylate moieties and between the N <sub>3</sub> -deprotonated thiourea and the carboxylic acid group .....                                                                                                                                                                                                                                                                                                                                                                                                                                                                              | 32 |
| <b>Table S5.</b> X3LYP/6-31+G(d,p)/PCM(DMSO) energy ( <i>E</i> , in hartrees), relative energy ( $\Delta E$ , in kcal/mol) and hydrogen-bond type, of the optimized structures of <b>1-GHB</b> derivatives with single/double hydrogen bonds between the thiourea and carboxylate or between the N <sub>3</sub> -deprotonated thiourea and the carboxylic acid group. ....                                                                                                                                                                                                                                                                                                                                                                     | 32 |
| <b>Part 10</b> - X3LYP/6-31+G(d,p)/PCM(DMSO) energies of the optimized structures of 2-GHB derivatives .....                                                                                                                                                                                                                                                                                                                                                                                                                                                                                                                                                                                                                                   | 33 |
| <b>Table S6.</b> X3LYP/6-31+G(d,p)/PCM(DMSO) energy ( <i>E</i> , in hartrees), relative energy ( $\Delta E$ , in kcal/mol) and hydrogen-bond type, of the optimized structures of <b>2-GHB</b> derivatives with                                                                                                                                                                                                                                                                                                                                                                                                                                                                                                                                |    |

|                                                                                                                                                                                                                                                                                                                                                                                                                                                                                                                                                                                                                                                                                                                          |    |
|--------------------------------------------------------------------------------------------------------------------------------------------------------------------------------------------------------------------------------------------------------------------------------------------------------------------------------------------------------------------------------------------------------------------------------------------------------------------------------------------------------------------------------------------------------------------------------------------------------------------------------------------------------------------------------------------------------------------------|----|
| single/double hydrogen bonds between the thiourea and carboxylate or between the N <sub>3</sub> -deprotonated thiourea and the carboxylic acid group. ....                                                                                                                                                                                                                                                                                                                                                                                                                                                                                                                                                               | 33 |
| <b>Part 11</b> - Simulated UV-Vis spectra of selected optimized geometries of rotamers of <b>1-GHB</b> derivatives.....                                                                                                                                                                                                                                                                                                                                                                                                                                                                                                                                                                                                  | 34 |
| <b>Figure S34.</b> Simulated UV-Vis spectra from the TD-DFT vertical excitation energies analysis of selected X3LYP/6-31+G(d,p)/PCM(DMSO) optimized geometries of rotamers of <b>1-GHB</b> derivatives at the same theory level (15 states, singlets only). Please, note that the main band is centered around 380 nm for species where the hydrogen bond takes place between the thiourea moiety and the carboxylate ( <b>1-GHB-a to 1-GHB-d</b> ) regardless of the number of hydrogen bonds formed and the main band is centered around 430-440 nm for species where the hydrogen bond takes place between the N <sub>3</sub> -deprotonated thiourea and the carboxylic acid group ( <b>1-GHB-e to 1-GHB-g</b> )..... | 34 |
| <b>Part 12</b> - Simulated UV-Vis spectra of selected optimized geometries of rotamers of <b>2-GHB</b> derivatives.....                                                                                                                                                                                                                                                                                                                                                                                                                                                                                                                                                                                                  | 35 |
| <b>Figure S35.</b> Simulated UV-Vis spectra from the TD-DFT vertical excitation energies analysis of selected X3LYP/6-31+G(d,p)/PCM(DMSO) optimized geometries of rotamers of <b>2-GHB</b> derivatives at the same theory level (15 states, singlets only). Please, note that the main band is centered around 380 nm for species where the hydrogen bond takes place between the thiourea moiety and the carboxylate ( <b>2-GHB-a to 2-GHB-d</b> ) regardless of the number of hydrogen bonds formed and the main band is centered around 430-440 nm for species where the hydrogen bond takes place between the N <sub>3</sub> -deprotonated thiourea and the carboxylic acid group ( <b>2-GHB-e to 2-GHB-h</b> )..... | 35 |
| <b>Part 13</b> - X3LYP/6-31+G(d,p)/PCM(DMSO) absolute (E, in hartrees) and relative (ΔE, in kcal/mol) of chemosensor 2-GHB-a (double hydrogen bond between thiourea and carboxylate) and 2-GHB-a' (no hydrogen bond, equivalent 1,2-trans cyclohexane ring substituents, Z,Z- thiourea and ester conformations) of increasing hydroxyacid chain .....                                                                                                                                                                                                                                                                                                                                                                    | 35 |
| <b>Table S7.</b> X3LYP/6-31+G(d,p)/PCM(DMSO) energy (E, in hartrees), relative energy (ΔE, in kcal/mol) and hydrogen-bond type, of the optimized structures of 2-GHB derivatives with (2-GHB-a) and without (2-GHB-a') double hydrogen bonds between the thiourea and carboxylate of increasing hydroxyacid chain (3 to 7 carbon atoms, noted as XC) with equivalent conformations of cyclohexane ring substituents, thiourea moiety and ester group. Please, note that the lowest stabilization due to the hydrogen bond formation takes place at the 3-hydroxypropionate, is maximum at GHB and, from there, decreases.....                                                                                            | 35 |
| <b>Part 14</b> –Stabilization of butyric acid and 1-methyl-3-(4-nitrophenyl)thiourea in different hydrogen-bonded complexes and protonation states.....                                                                                                                                                                                                                                                                                                                                                                                                                                                                                                                                                                  | 36 |
| <b>Table S8.</b> X3LYP/6-31+G(d,p)/PCM(DMSO) energy (E, in hartrees), relative energy (ΔE, in kcal/mol) of butyric acid/butyrate, 1-methyl-3-(4-nitrophenyl)thiourea and N <sub>3</sub> -deprotonated 1-methyl-3-(4-nitrophenyl)thiourea in different hydrogen-bonded complexes.....                                                                                                                                                                                                                                                                                                                                                                                                                                     | 36 |
| <b>Annex I:</b> XYZ cartesian coordinates of the optimized energies of 32 starting rotamers of chemosensor <b>1</b> ( <b>1-conf1 to 1-conf32</b> ).....                                                                                                                                                                                                                                                                                                                                                                                                                                                                                                                                                                  | 37 |
| <b>Annex II:</b> XYZ cartesian coordinates of the optimized energies of 28 starting rotamers of chemosensor <b>2</b> ( <b>2-conf1 to 2-conf28</b> ).....                                                                                                                                                                                                                                                                                                                                                                                                                                                                                                                                                                 | 63 |

|                                                                                                                                                                                                                                                             |     |
|-------------------------------------------------------------------------------------------------------------------------------------------------------------------------------------------------------------------------------------------------------------|-----|
| <b>Annex III:</b> XYZ cartesian coordinates of the optimized energies of several <b>1-GHB</b> geometries bearing different hydrogen bonding modes between the thiourea and carboxylate moieties.<br>.....                                                   | 91  |
| <b>Annex IV:</b> XYZ cartesian coordinates of the optimized energies of several <b>2-GHB</b> geometries bearing different hydrogen bonding modes between the thiourea and carboxylate moieties.<br>.....                                                    | 98  |
| <b>Annex V:</b> XYZ cartesian coordinates of the optimized energies of the two <b>2-GHB</b> series (with and without hydrogen bond) with increasing hydroxyacid chain (XYZ cartesian coordinates of 2-GHB-a is present already on previous Annex IV). ..... | 108 |

## Reported data and comparison

**Table S1.** Comparison with other sensors published

| SENSOR                                                                              | DETECTION                                           | RECOGNITION                                            | LoDs (mg/mL) | INTERFERENTS          | REFERENCE                                              |
|-------------------------------------------------------------------------------------|-----------------------------------------------------|--------------------------------------------------------|--------------|-----------------------|--------------------------------------------------------|
| 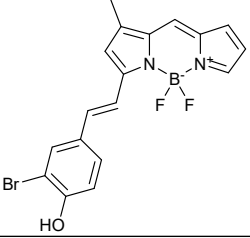   | FLUORESCENCE<br>On-Off                              | Acid moiety by hydrogen bond                           | 5            | Some Acids            | <i>Chem. Commun.</i> , <b>2014</b> , 50, 2904          |
|    | FLUORESCENCE<br>Off-On<br>Pre-treatment is required | No data available                                      | 10           | No data available     | <i>Chem. Commun.</i> , <b>2013</b> , 49, 6170-6172     |
|   | FLUORESCENCE<br>On-Off                              | No data available                                      | 0.15         | No data available     | <i>J. Mater. Chem. B</i> , <b>2017</b> , 5, 2739--2742 |
|  | COLOUR<br>Yellow to red<br>FLUORESCENCE<br>Off-On   | Deprotonation of acid moiety                           | 0.04         | Some Acids and sugars | <i>Chem. Commun.</i> , <b>2020</b> , 56, 12600-12603   |
|  | COLOUR<br>Yellow to orange                          | Double recognition: Acid-base and hemiacetal formation | 0.17         | Some Acids and sugars | <i>This work</i>                                       |

## NMR Spectra

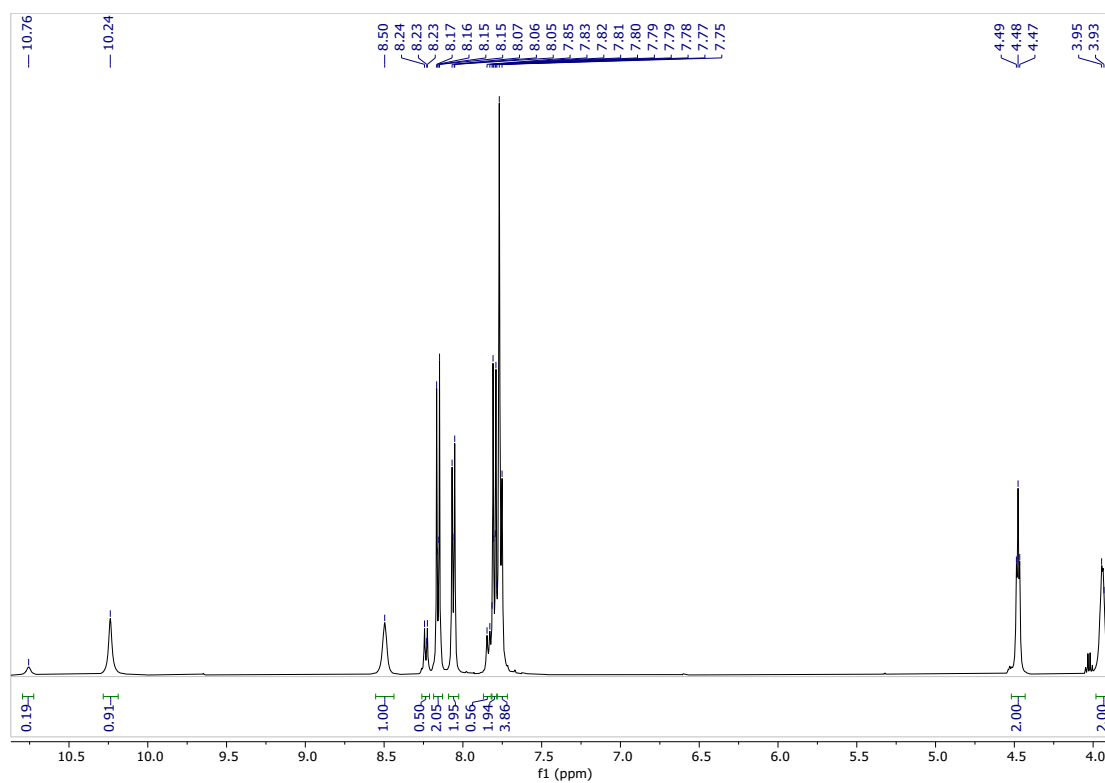

Figure S1.  $^1\text{H}$  NMR spectrum of compound 1 in  $\text{DMSO-}d_6$ .

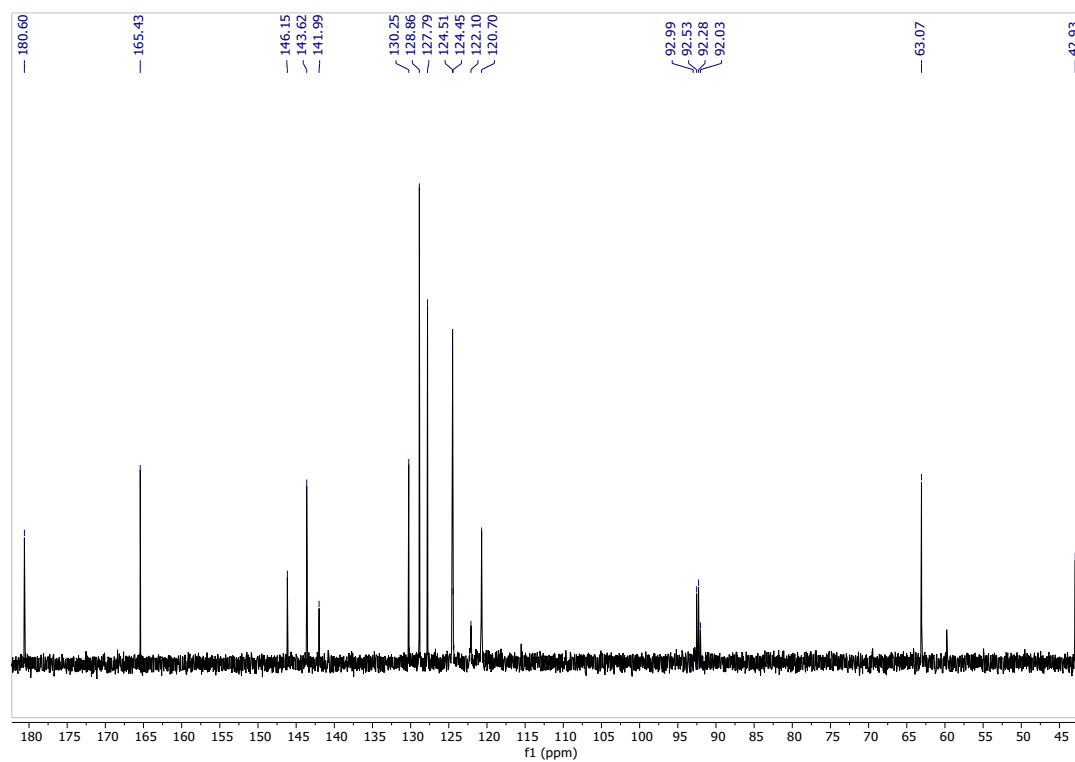

Figure S2.  $^{13}\text{C}$  NMR spectrum of compound 1 in  $\text{DMSO-}d_6$ .

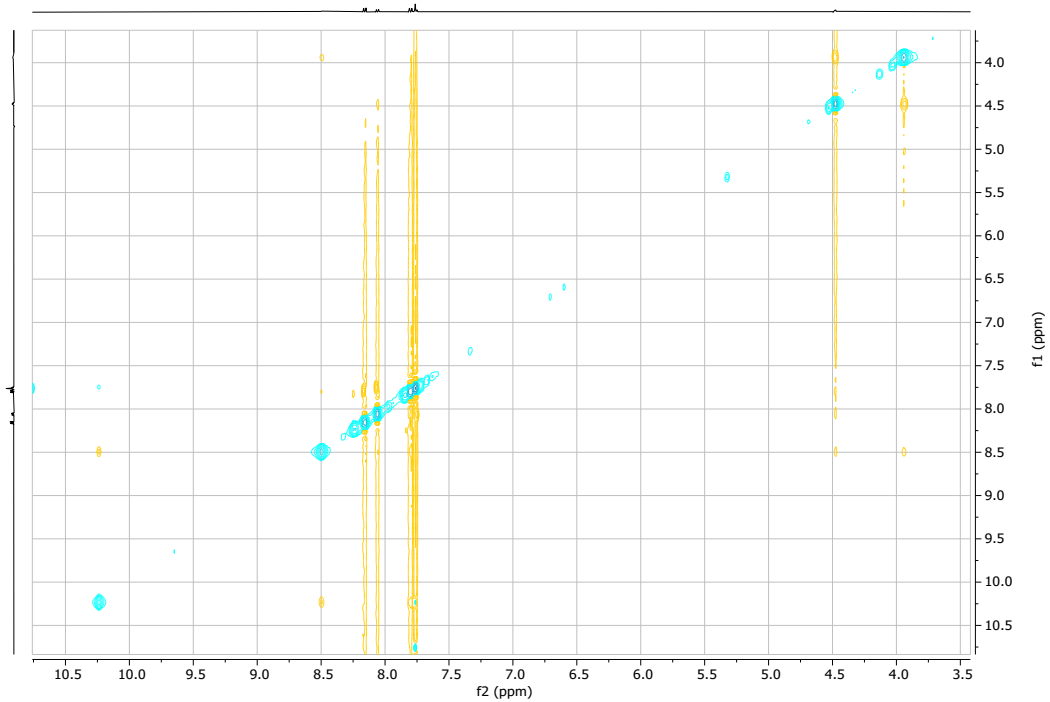

Figure S3. NOESY spectrum of compound **1** in DMSO- $d_6$ .

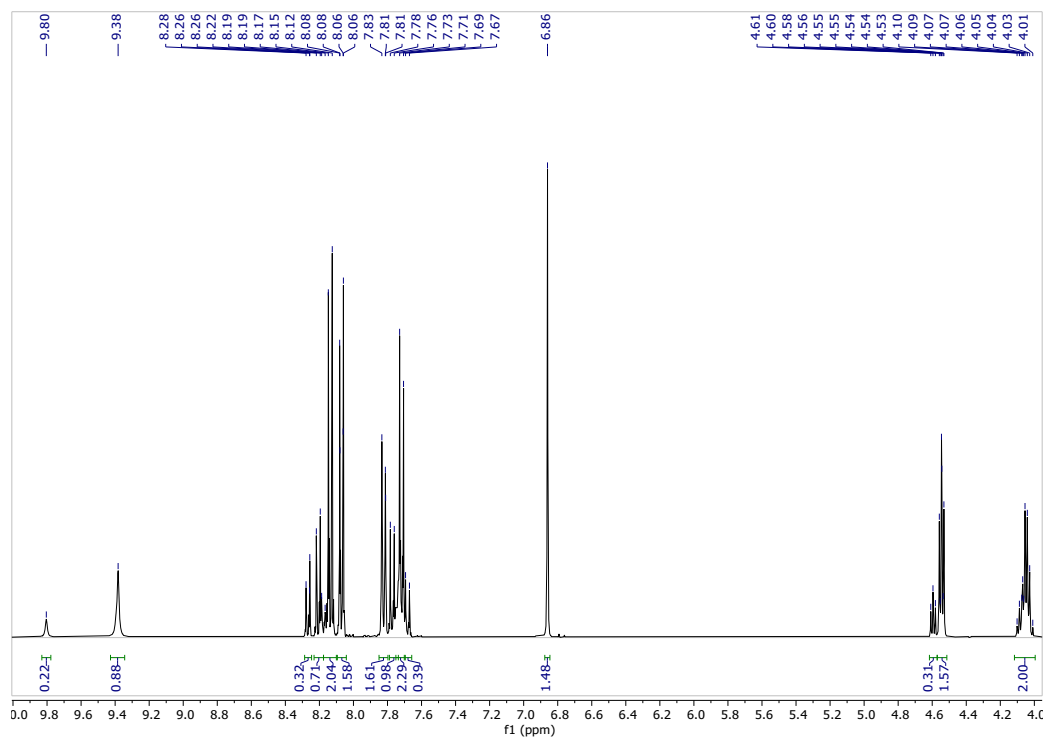

Figure S4.  $^1\text{H}$  NMR spectrum of compound **1** in THF- $d_8$ .



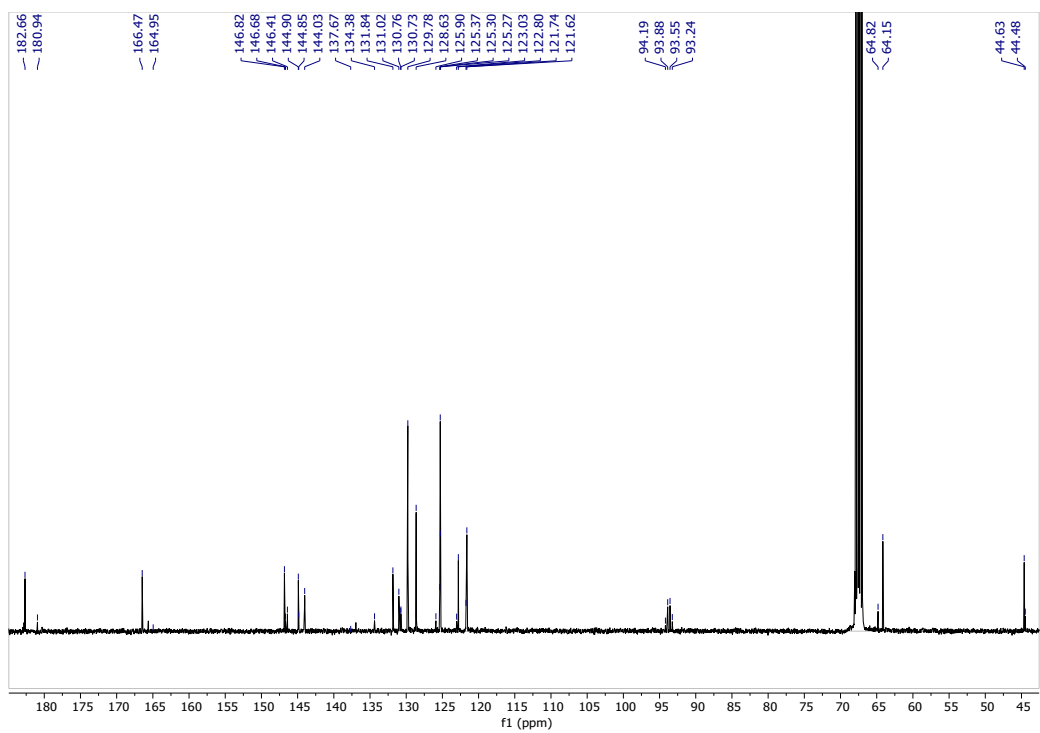

Figure S5.  $^{13}\text{C}$  NMR spectrum of compound **1** in  $\text{THF-}d_8$ .

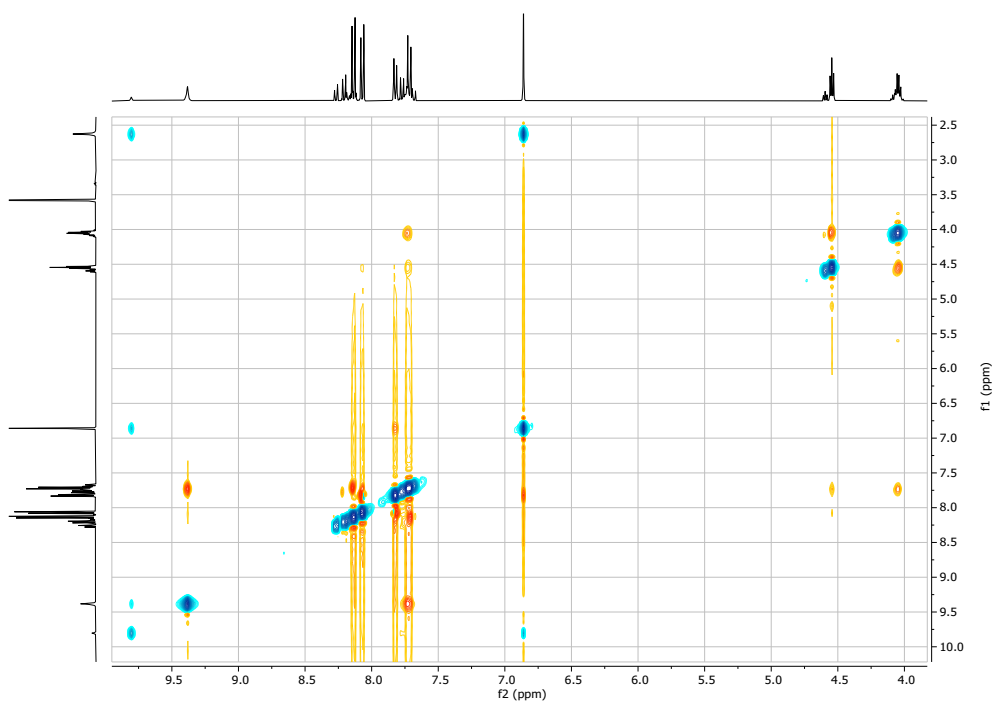

Figure S6. NOESY spectrum of compound **1** in  $\text{THF-}d_8$ .

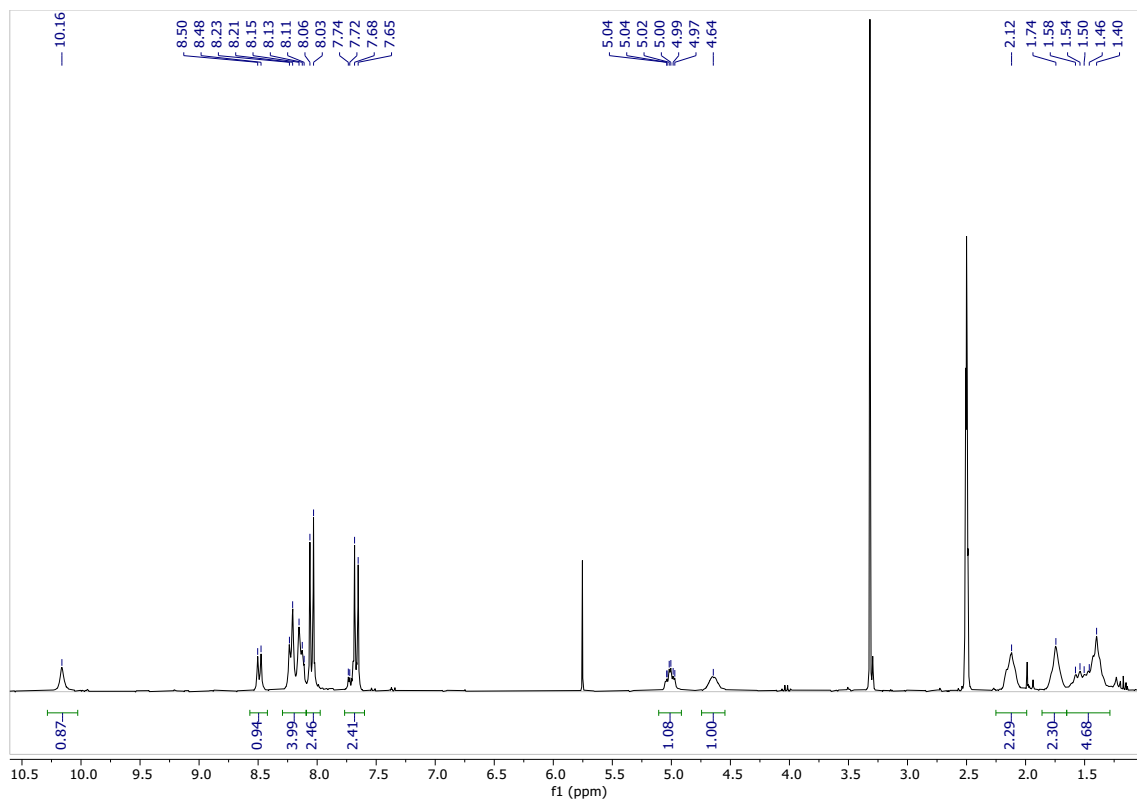

Figure S7.  $^1\text{H}$  NMR spectrum of compound **2** in  $\text{DMSO-}d_6$ .

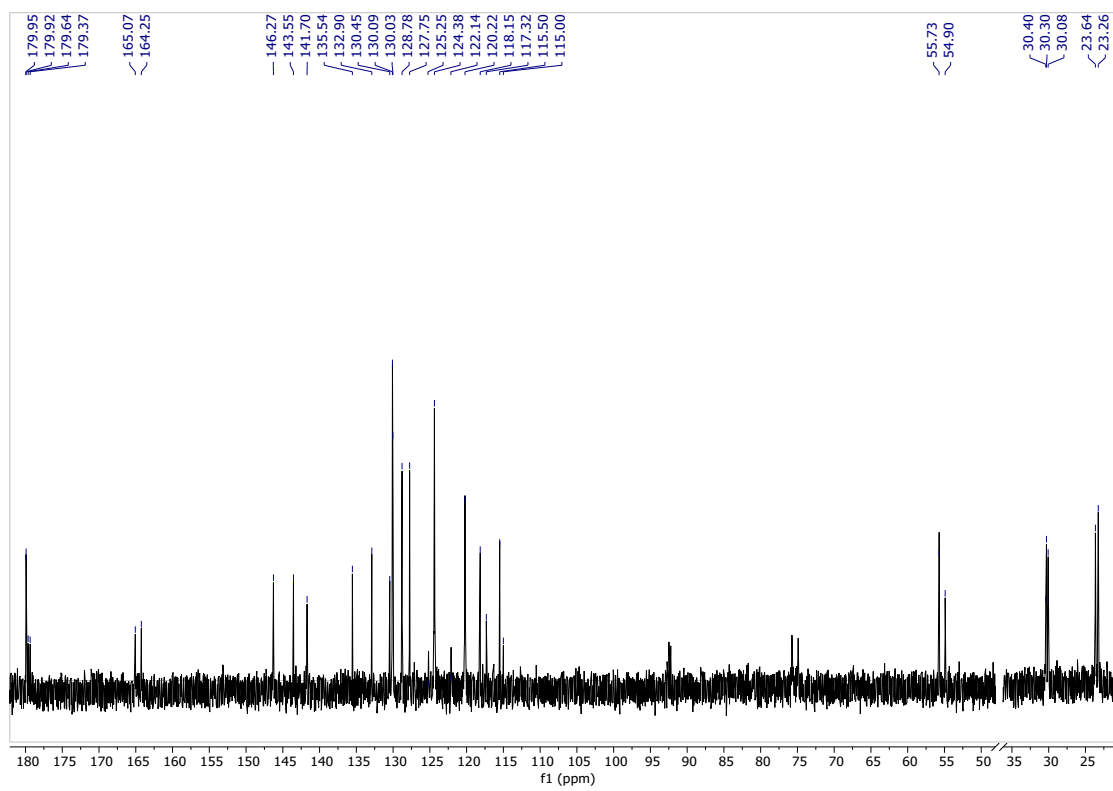

Figure S8.  $^{13}\text{C}$  NMR spectrum of compound **2** in  $\text{DMSO-}d_6$ .

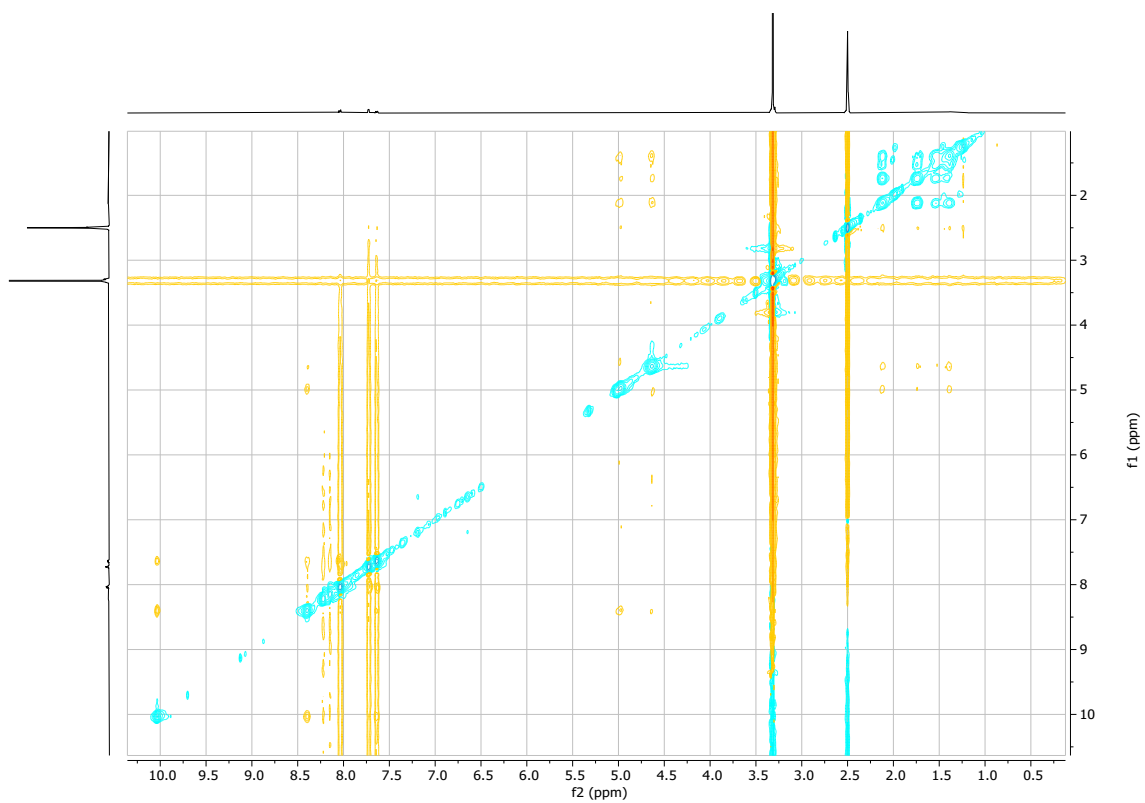

Figure S9. NOESY spectrum of compound **2** in DMSO- $d_6$ .

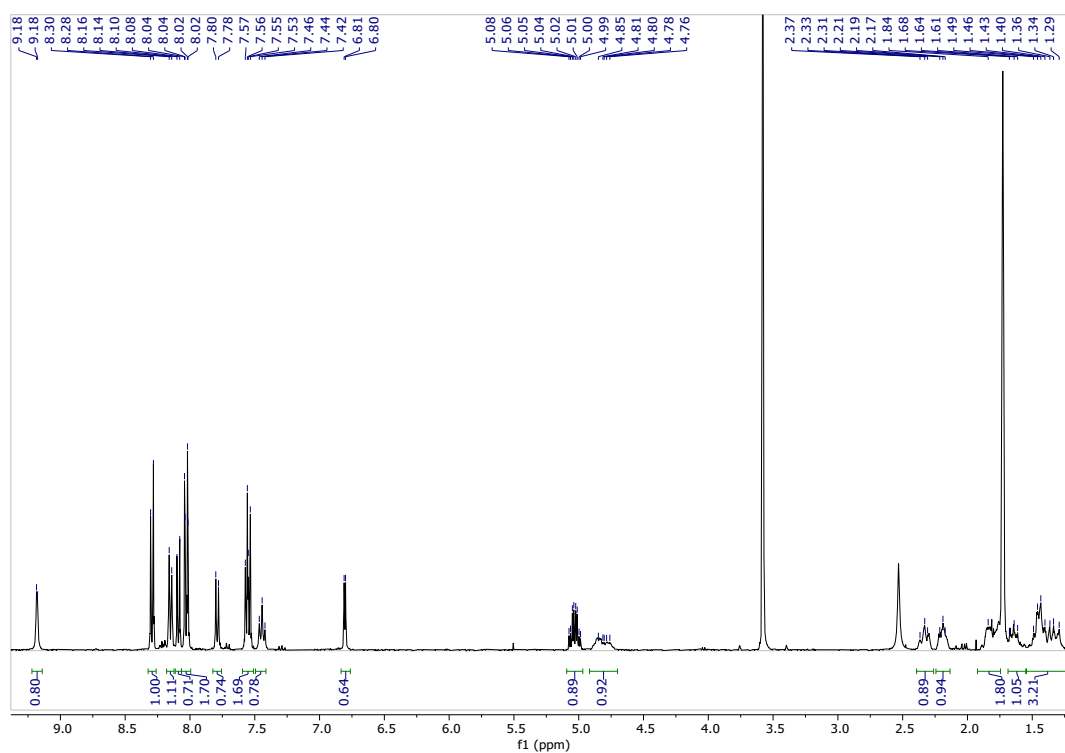

Figure S10.  $^1\text{H}$  NMR spectrum of compound **2** in THF- $d_8$ .

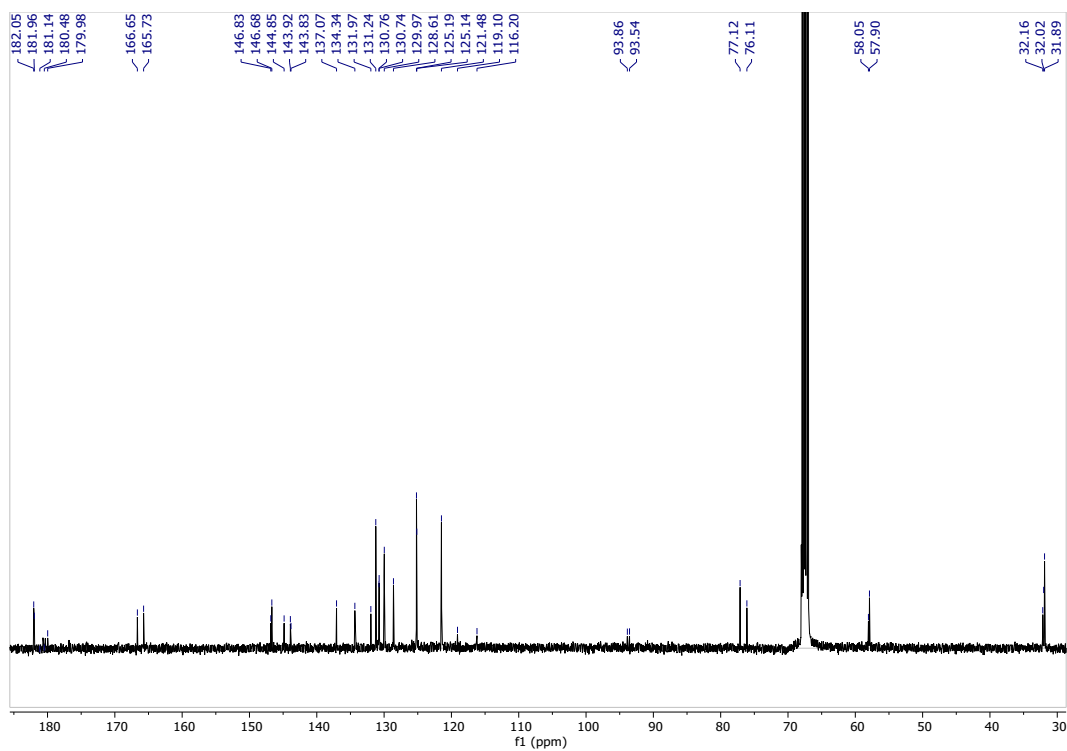

Figure S11.  $^{13}\text{C}$  NMR spectrum of compound **2** in  $\text{THF-}d_8$ .

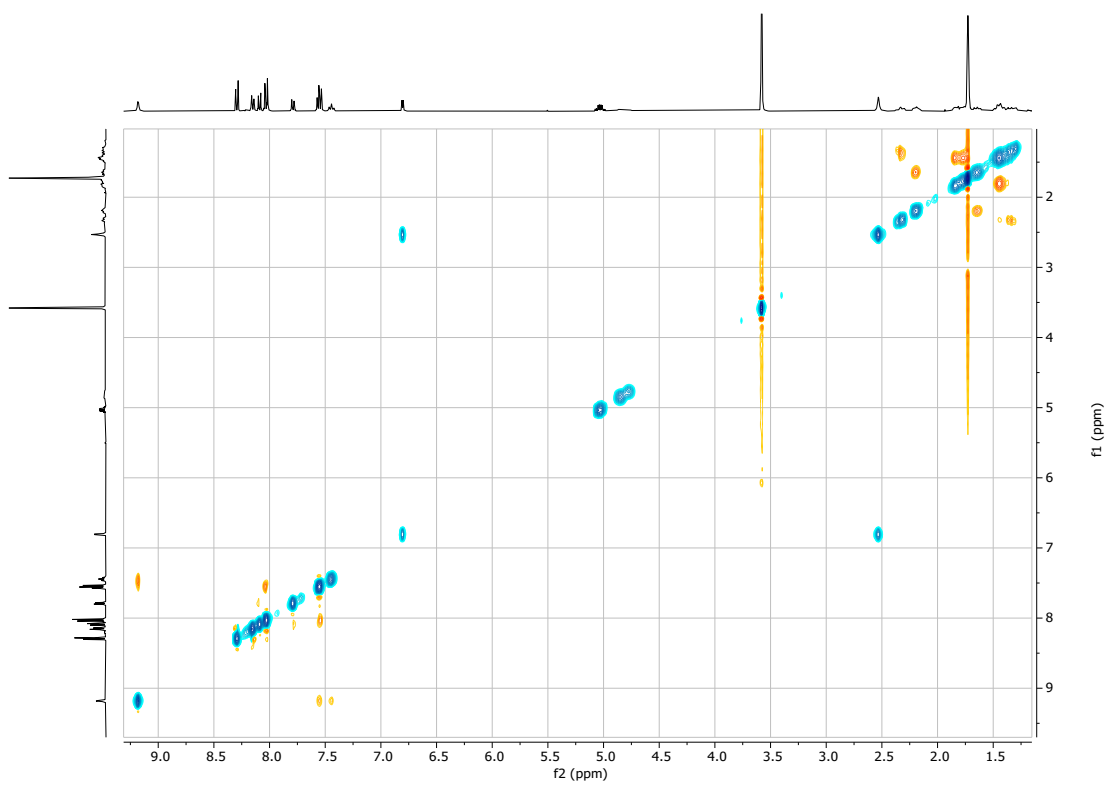

Figure S12. NOESY spectrum of compound **2** in  $\text{THF-}d_8$ .

## Mass Spectrometry Spectra

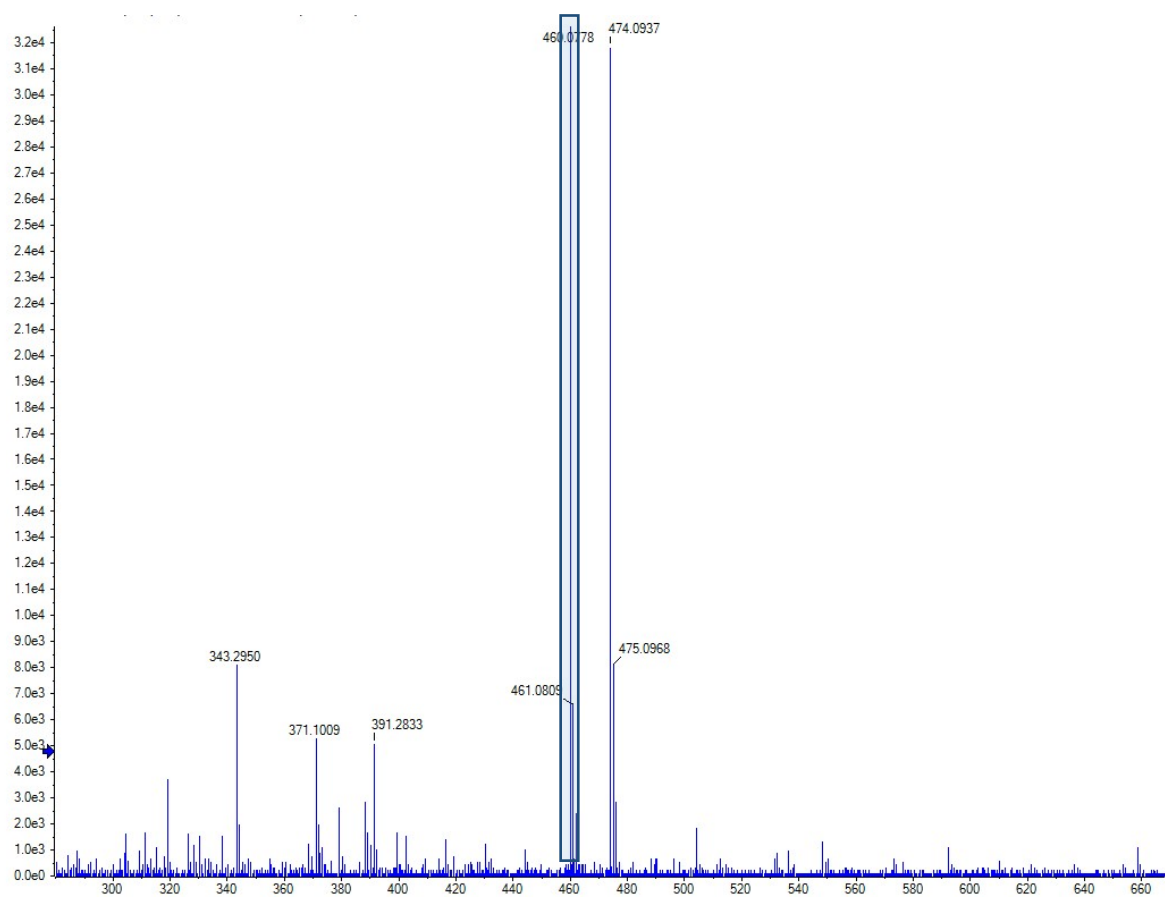

Figure S13. Mass Spectrum of compound 1.

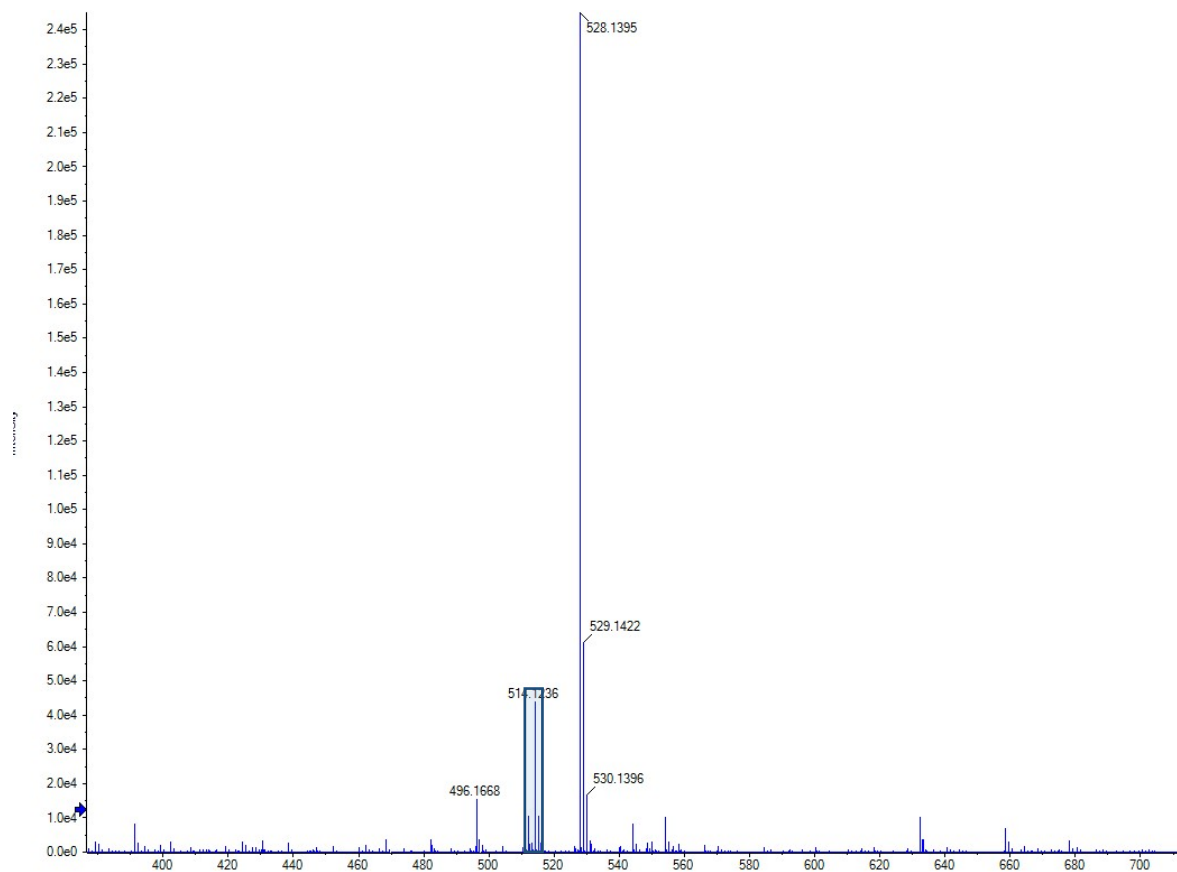

**Figure S14.** Mass Spectrum of compound 2.

## UV-Vis analysis

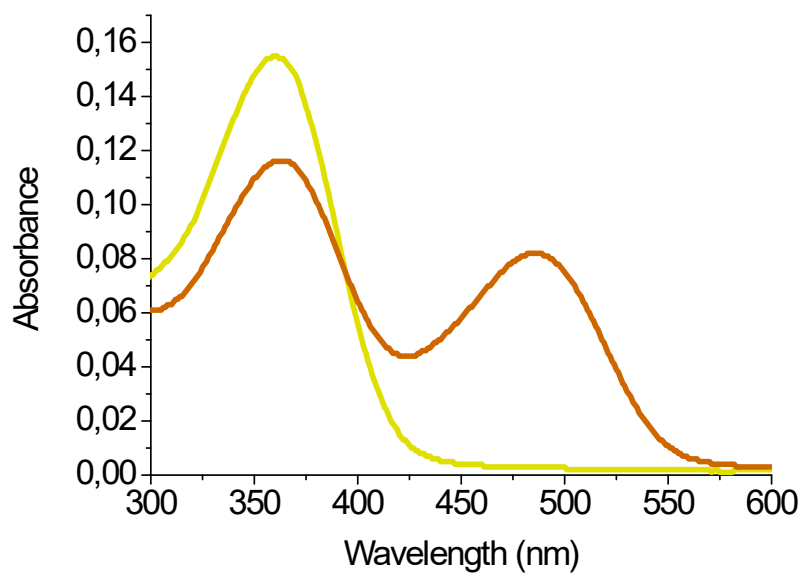

**Figure S15.** Changes observed in UV spectrum of compound **2** in presence of an excess of NaGHB.

## NMR Analysis

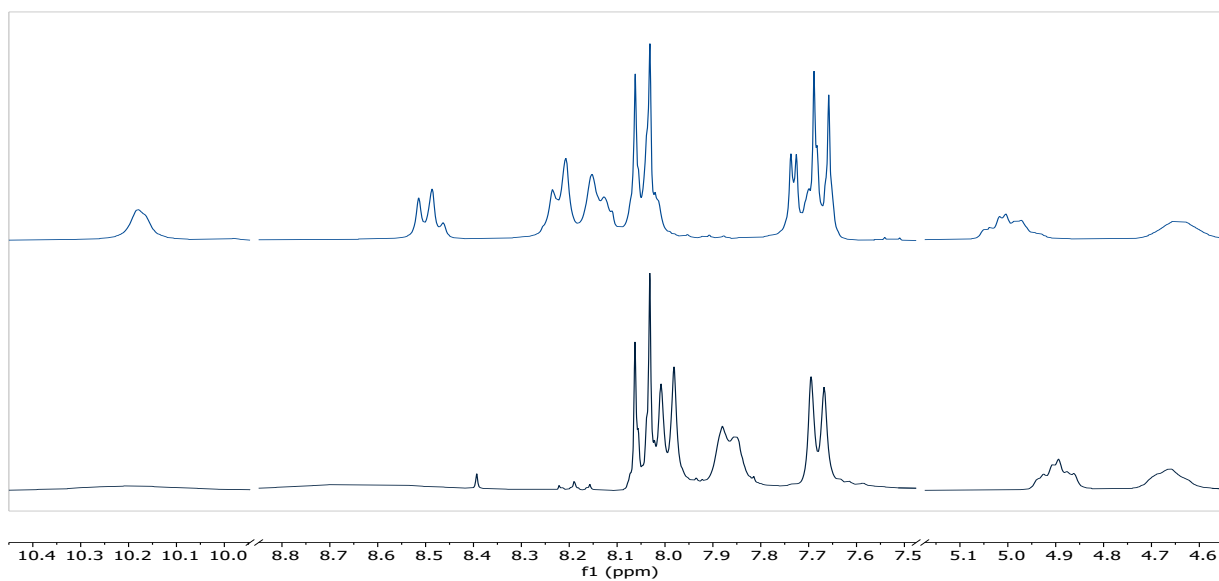

**Figure S16.** Changes observed in  $^1\text{H}$  NMR spectrum of **2** in presence of an excess of GHB in  $\text{DMSO-}d_6$ .

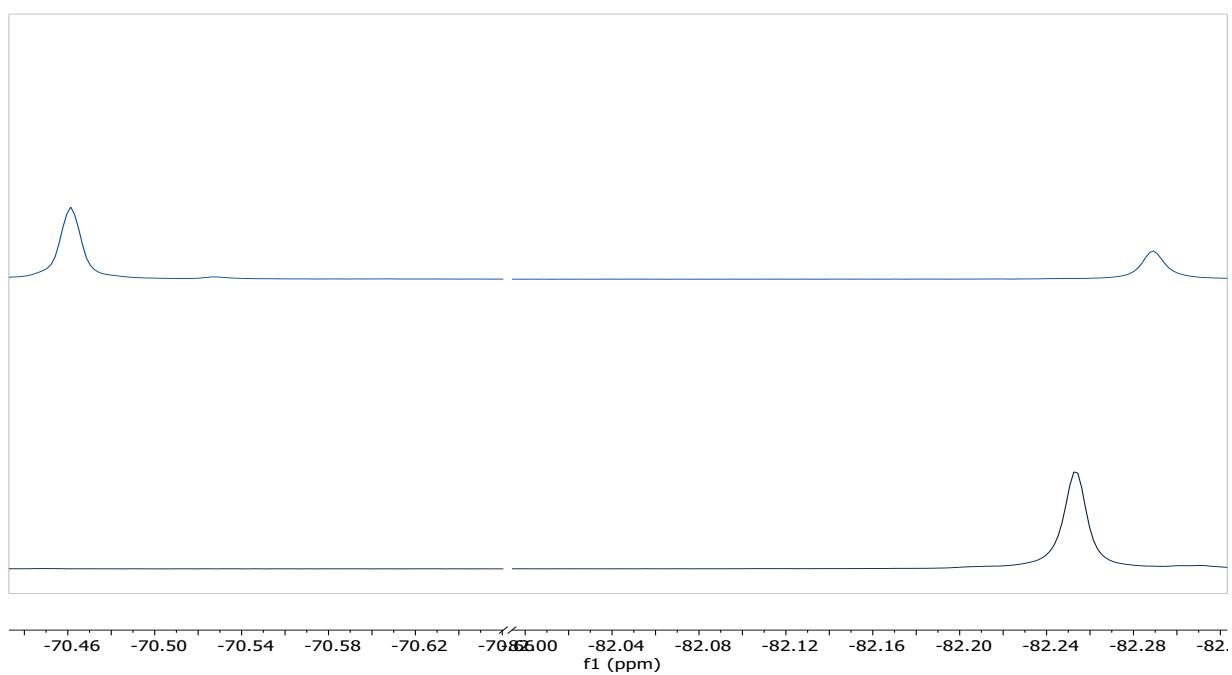

**Figure S17.** Changes observed in  $^{19}\text{F}$  NMR spectrum of **2** in presence of an excess of GHB in  $\text{DMSO-}d_6$ .



## UV-Vis titrations spectra

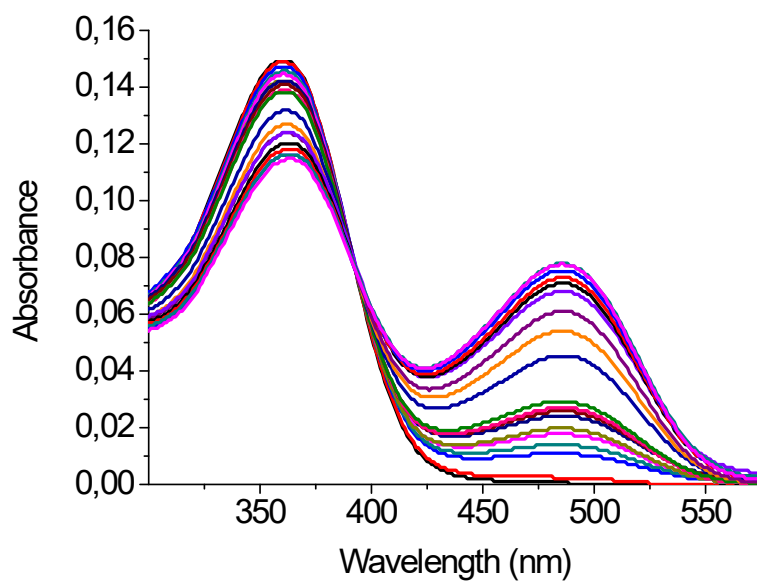

**Figure S18.** UV-visible spectra of probe **2** with increasing amounts of GHB (0–10 eq.) in DMSO (10  $\mu$ M of **2**)

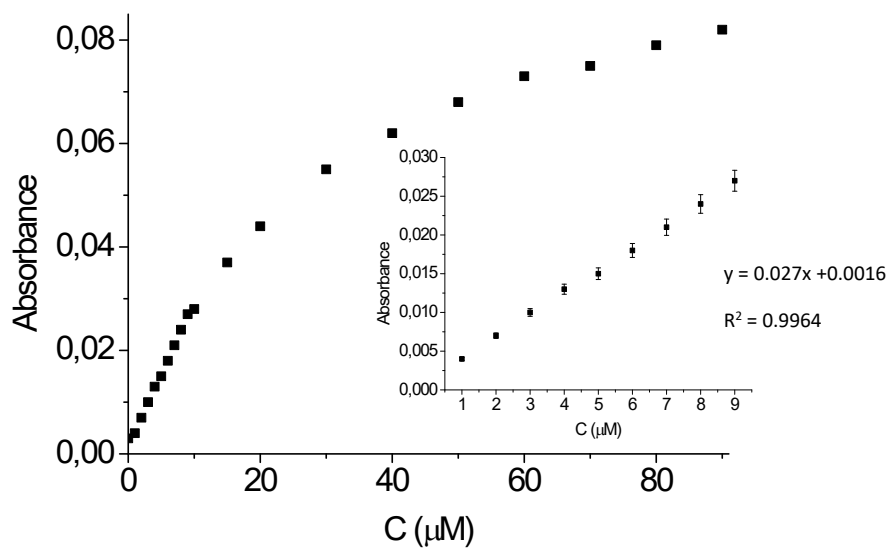

**Figure S19.** Changes in the absorbance at 485 nm of DMSO solutions of probe **2** upon the addition of increasing amounts of GHB

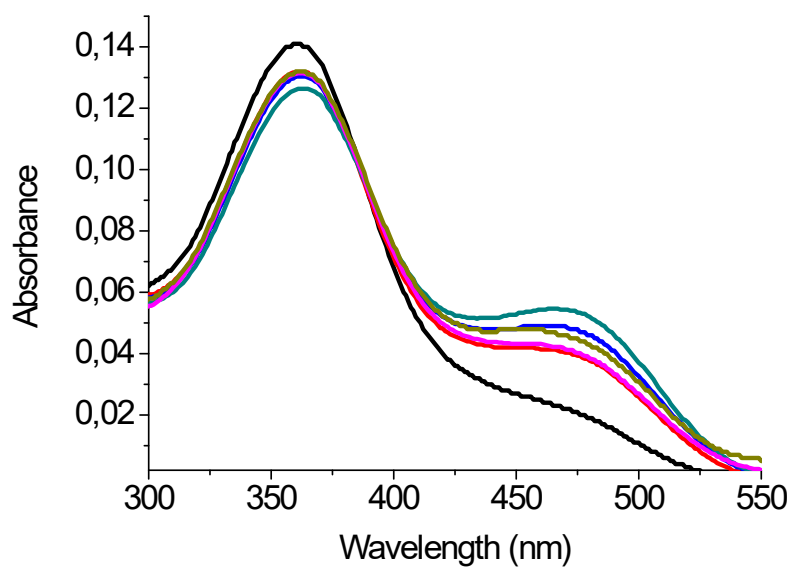

**Figure S20.** UV-visible changes of probe **1** with increasing amounts of GHB (0–21 eq.) in DMSO:H<sub>2</sub>O 95:5 media (10  $\mu$ M of **1**).

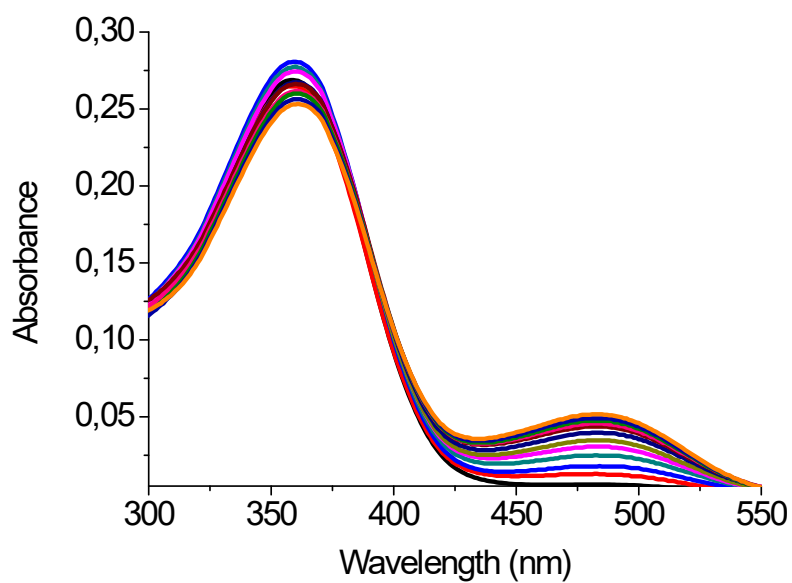

**Figure S21.** UV-visible changes of probe **2** with increasing amounts of GHB (0–42 eq.) in DMSO:H<sub>2</sub>O 95:5 media (10  $\mu$ M of **2**).

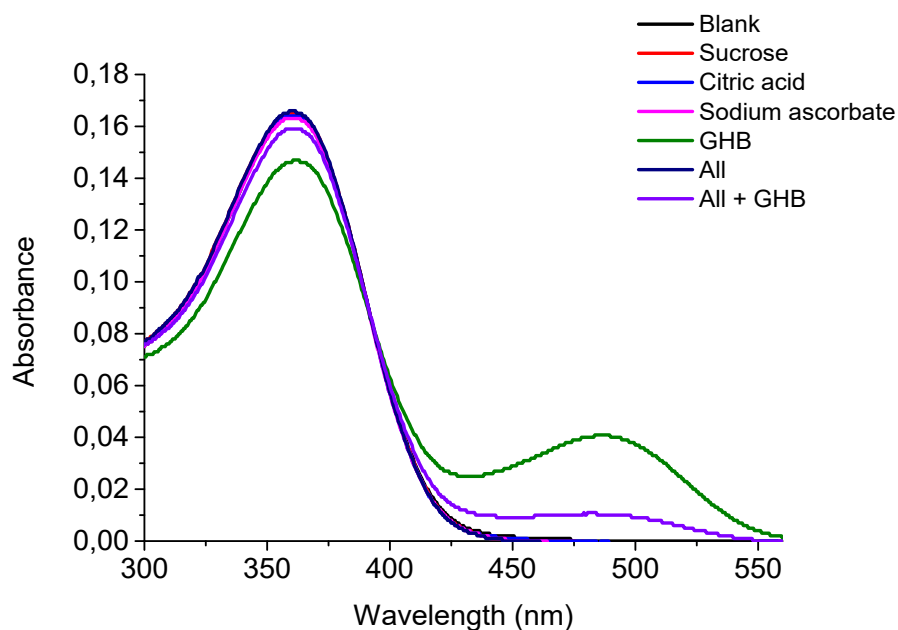

**Figure S22.** Absorbance spectra of **2** (10  $\mu\text{M}$  in DMSO) in the presence of citric acid, sodium ascorbate, sucrose (in real concentration present in beverages) and NaGHB (1 eq).

**Table S2.** Recovery and accuracy determination of the method to probe **1**. Recovery and accuracy of the method were calculated according to reference K. A. Rawat, R.K. Singhal, S. K. Kailasa, *RSC Advances*, 2016, **6**, 32025.

| KNOWN CONCENTRATION ( $\mu\text{M}$ ) | FOUND CONCENTRATION ( $\mu\text{M}$ ) | RECOVERY % <sup>a</sup> | ACCURACY % <sup>b</sup> |
|---------------------------------------|---------------------------------------|-------------------------|-------------------------|
| 5                                     | 4.48                                  | 89.50                   | -10,50                  |

<sup>a</sup> % recovery (found concentration/known concentration) x 100

<sup>b</sup> % accuracy (found concentration – known concentration/known concentration) x 100

### Constant determination

The binding process can be described by the reaction

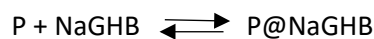

P= Probe, P@NaGHB = complex

The equilibrium constant was defined as  $K = \frac{[P@NaGHB]}{[P][NaGHB]}$

The analysis of the titration curves were done according to the following equation:[1]

$$\left[ \frac{C_P C_{NaGHB}}{\Delta A} \right] + \left( \frac{\Delta A}{\Delta \epsilon^2} \right) = \left( \frac{1}{K \Delta \epsilon} \right) + \left[ \frac{C_P + C_{NaGHB}}{\Delta \epsilon} \right]$$

where:

$C_P$  and  $C_{NaGHB}$  are the total probe and drug concentrations

$$\Delta A = A - \epsilon_p C_p$$

$$\epsilon_p = \Delta A^0 / C_p, A^0 \text{ initial absorbance of NaGHB}$$

$$\Delta\varepsilon = \varepsilon_{p@NaGHB} - \varepsilon_p$$

Iterations were carried out using Origin 2000.

[1] Borja Díaz de Greñu, José García-Calvo, José Cuevas, Gabriel García-Herbosa,<sup>a</sup> Begoña Garía, Natalia Busto, Saturnino Ibeas, Tomás Torroba, Blanca Torroba, Antonio Herrera and Sebastian Pons, *Chem. Sci.*, 2015, 6, 3757

## $\omega$ -hydroxyacids analysis

### NMR essays

A solution 100 mM of **1** and 100 mM of each  $\omega$ -hydroxyacid were prepared in DMSO- $d_6$ . 50  $\mu$ L of solution of **1** and 50  $\mu$ L of solution of each  $\omega$ -hydroxyacid were mixed and then diluted until 500  $\mu$ L with DMSO- $d_6$ .

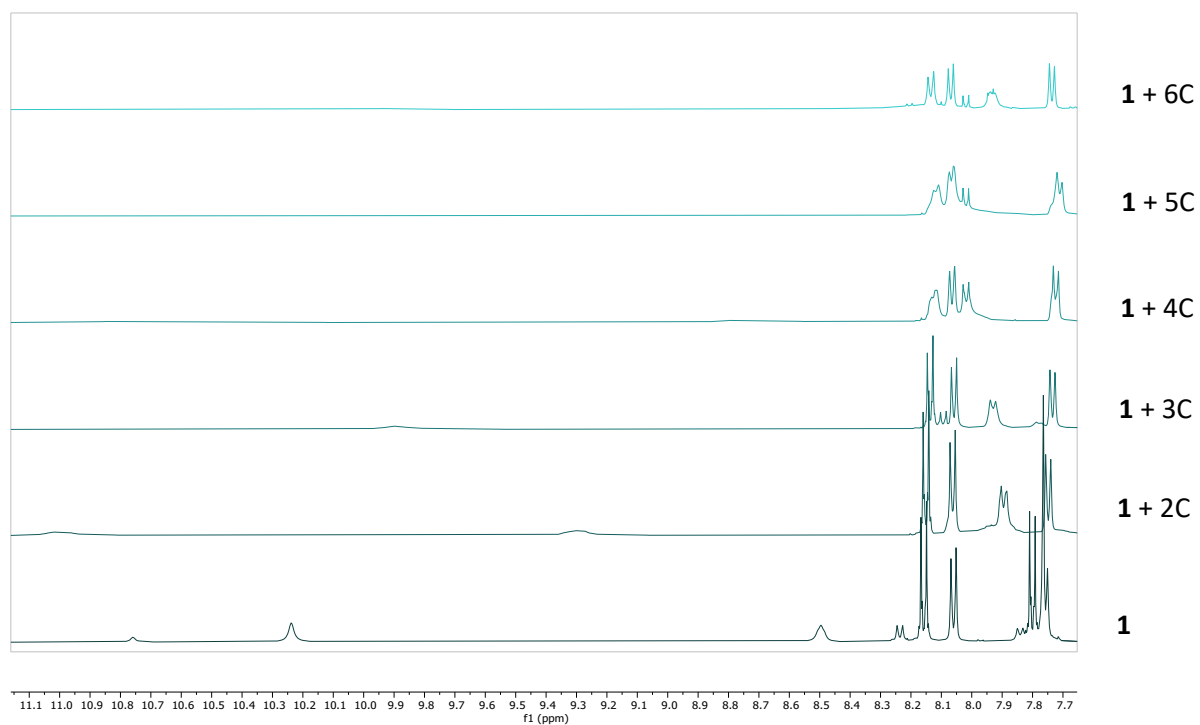

**Figure S23.** Changes observed in  $^1\text{H}$  NMR spectrum of **1** in presence of 1 eq. of  $\omega$ -hydroxyacids of  $n$  carbon atoms in DMSO- $d_6$ .

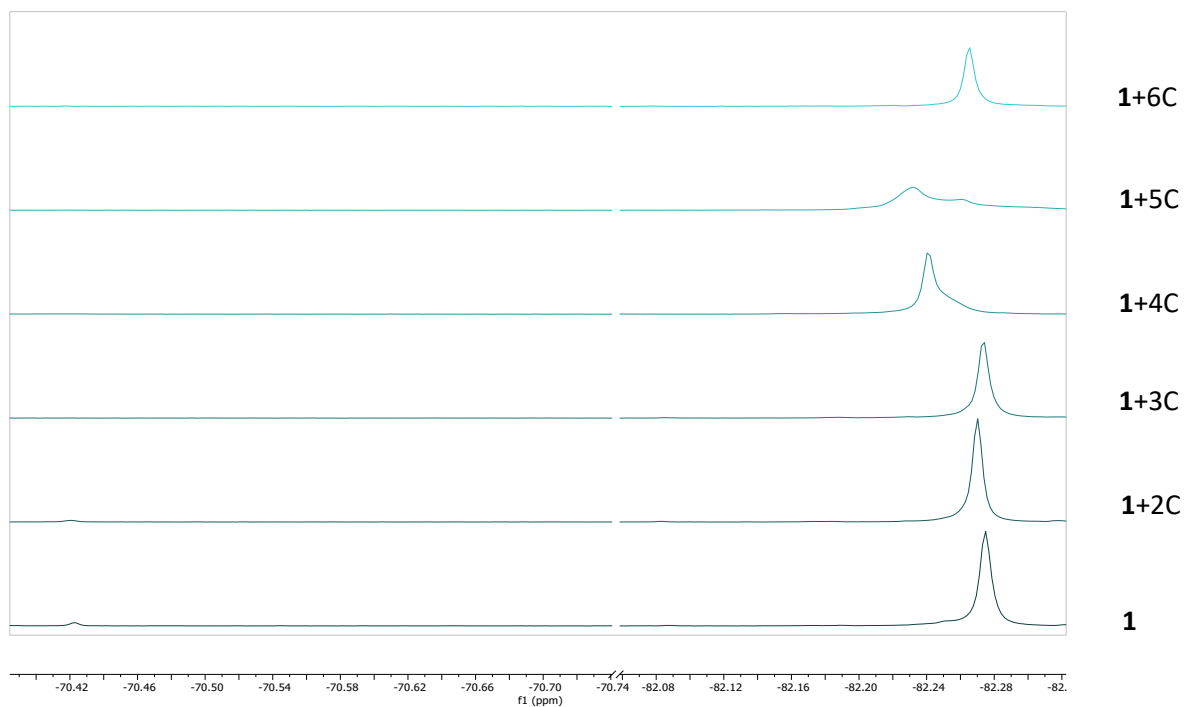

**Figure S24.** Changes observed in  $^{19}\text{F}$  NMR spectrum of **1** in presence of 1 eq of  $\omega$ -hydroxyacid in  $\text{DMSO-}d_6$ .

#### UV-Vis essays

In a cuvette of 3 mL, 3  $\mu\text{L}$  of solution of **1** (100 mM in DMSO) and 9.9  $\mu\text{L}$  of solution of each  $\omega$ -hydroxyacid (100 mM in DMSO) were mixed and diluted until 3000  $\mu\text{L}$  with DMSO.

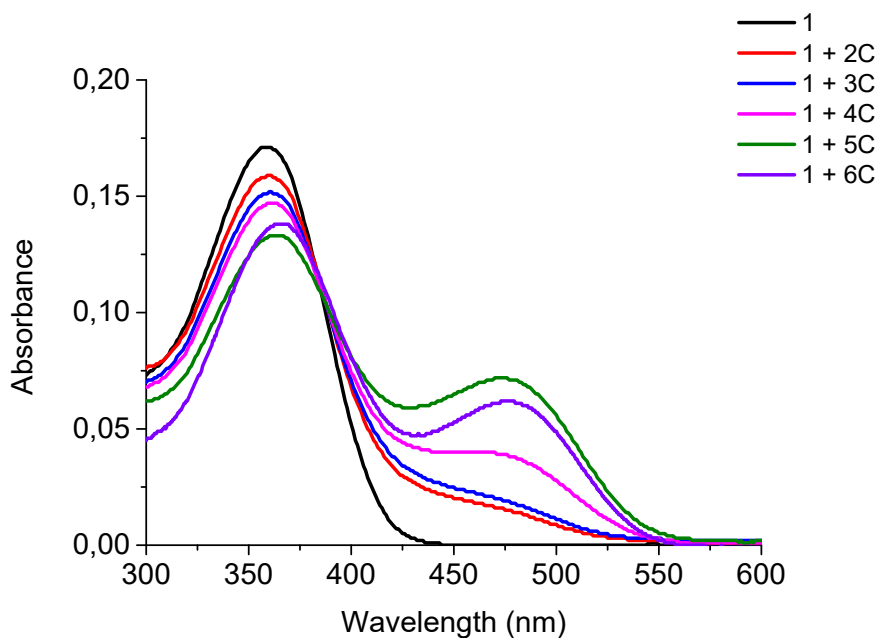

**Figure S25.** Changes observed in UV-Vis spectrum of **1** in presence of 3.3 eq. of  $\omega$ -hydroxyacids in DMSO.

## Real Samples Analysis

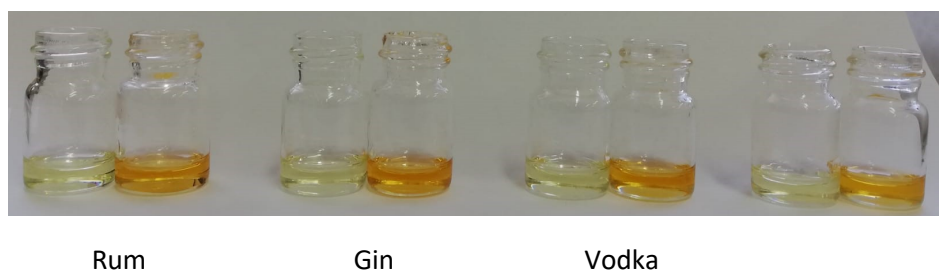

**Figure S26.** Colour changes observed in real samples with compound **2** (alcoholic drinks).

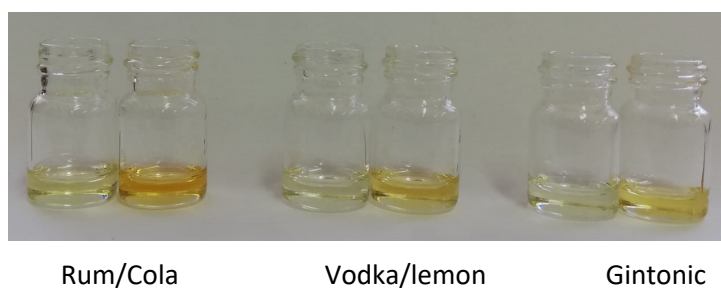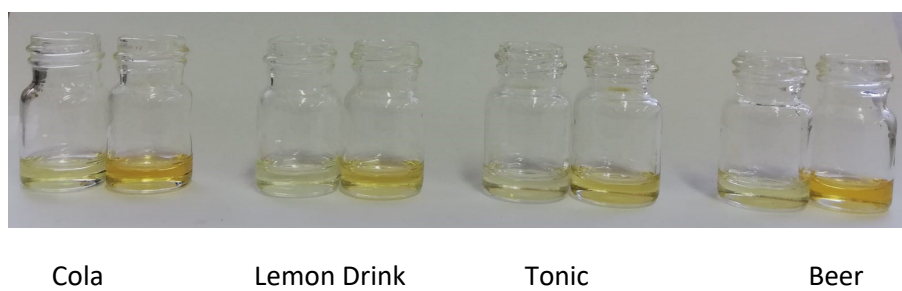

**Figure S27.** Colour changes observed in real samples with compound **2** (soft drinks and beverages).

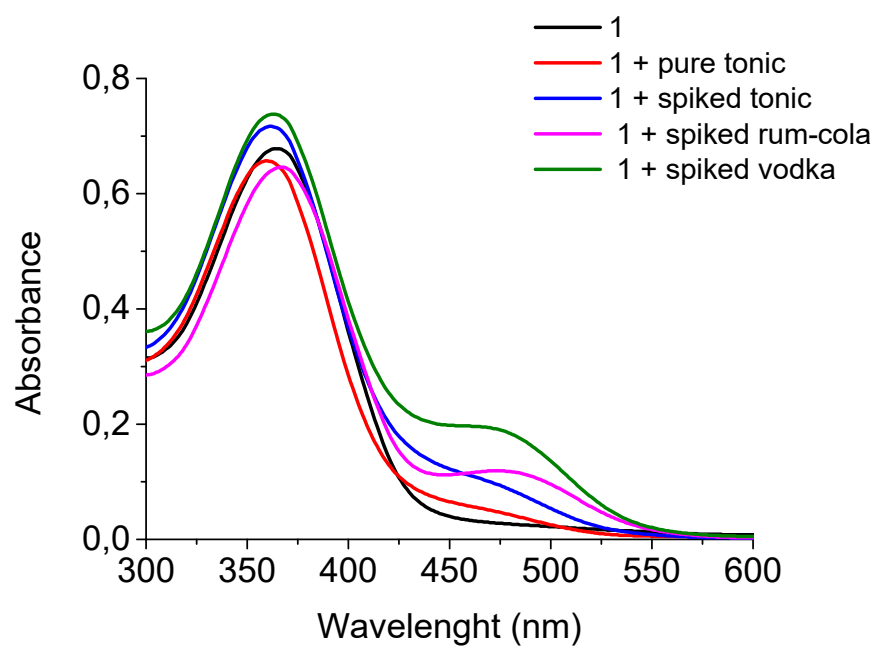

**Figure S28.** Changes observed in UV-Vis spectrum of **1** pure and in presence of spiked rum-cola, spiked vodka, spiked tonic and pure tonic. Sensor 60  $\mu$ M in DMSO in presence of GHB 0.75 mM in the spiked samples. (percent of water < 5%)



## Theoretical calculations

Complete reference for Gaussian09, Rev. D.01:

Gaussian 09, Revision D.01, M. J. Frisch, G. W. Trucks, H. B. Schlegel, G. E. Scuseria, M. A. Robb, J. R. Cheeseman, G. Scalmani, V. Barone, G. A. Petersson, H. Nakatsuji, X. Li, M. Caricato, A. Marenich, J. Bloino, B. G. Janesko, R. Gomperts, B. Mennucci, H. P. Hratchian, J. V. Ortiz, A. F. Izmaylov, J. L. Sonnenberg, D. Williams-Young, F. Ding, F. Lipparini, F. Egidi, J. Goings, B. Peng, A. Petrone, T. Henderson, D. Ranasinghe, V. G. Zakrzewski, J. Gao, N. Rega, G. Zheng, W. Liang, M. Hada, M. Ehara, K. Toyota, R. Fukuda, J. Hasegawa, M. Ishida, T. Nakajima, Y. Honda, O. Kitao, H. Nakai, T. Vreven, K. Throssell, J. A. Montgomery, Jr., J. E. Peralta, F. Ogliaro, M. Bearpark, J. J. Heyd, E. Brothers, K. N. Kudin, V. N. Staroverov, T. Keith, R. Kobayashi, J. Normand, K. Raghavachari, A. Rendell, J. C. Burant, S. S. Iyengar, J. Tomasi, M. Cossi, J. M. Millam, M. Klene, C. Adamo, R. Cammi, J. W. Ochterski, R. L. Martin, K. Morokuma, O. Farkas, J. B. Foresman, and D. J. Fox, Gaussian, Inc., Wallingford CT, 2016.

The following Supporting Information section, which contains the details of computational calculations performed in this work, has been structured in the following subsections (which, in turn, has its own bibliographic references included at the end):

- **Part 1** - Computational methods. In this section, computational details about the geometrical optimizations and the vertical excitation analysis are given.
- **Part 2** - Figure of X3LYP/6-31G(d)/PCM(DMSO) energy barrier profiles along restricted singlet potential energy hypersurface (PES) of the dihedral angle of both NH-C bonds at the reduced 1-methyl-3-(4-nitrophenyl)thiourea going from *Z* to *E* rotamer (relaxed PES scan, 12 points, 15° each one at the corresponding dihedral angle).
- **Part 3** -Figure of X3LYP/6-31G(d)/PCM(DMSO) energy barrier profiles along restricted singlet PES of the dihedral angle of both NH-C bonds of compound **1** (starting from one of its selected minimum-energy optimized conformations) going from *Z* to *E* rotamer (relaxed PES scan, 12 points, 15° each one at the corresponding dihedral angle).
- **Part 4** -Figure of X3LYP/6-31G(d)/PCM(DMSO) energy barrier profiles along restricted singlet PES of the dihedral angle of both NH-C bonds of compound **2** (starting from one of its selected minimum-energy optimized conformations) going from *Z* to *E* rotamer (relaxed PES scan, 12 points, 15° each one at the corresponding dihedral angle).
- **Part 5** -X3LYP/6-31+G(d,p)/PCM(DMSO) energies of the optimized structures for the different 32 starting rotamers found along the full-search of the PES for chemosensor **1**. Starting structures were the six different eclipsed and staggered conformers along the C-C ethylenic bond as well as the *E,E*-, *E,Z*-, *Z,E*- and *Z,Z*- thiourea conformers and rotamers around –CH<sub>2</sub>-O-C(=O)-Ar dihedral angle. Distances between C=O of trifluoromethyl acetate group and C=S thiourea carbon atoms are also depicted.
- **Part 6** -X3LYP/6-31+G(d,p)/PCM(DMSO) energies of the optimized structures for the different 28 starting rotamers found along the full-search of the PES for chemosensor **2**. Starting structures were the different ester and thiourea diaxial 1,2-*anti*- or diequatorial 1,2-*anti*- diastereoisomers over the cyclohexane ring together with the rotamers around –CH<sub>2</sub>-O-C(=O)-Ar dihedral angle. Distances between C=O of trifluoromethyl acetate group and C=S thiourea carbon atoms are also depicted.

- **Part 7** - Simulated UV-Vis spectra from the TD-DFT vertical excitation energies analysis of selected X3LYP/6-31+G(d,p)/PCM(DMSO) optimized geometries of rotamers of **1** at the same theory level (30 states, singlets only).
- **Part 8** - Simulated UV-Vis spectra from the TD-DFT vertical excitation energies analysis of selected X3LYP/6-31+G(d,p)/PCM(DMSO) optimized geometries of rotamers of **2** at the same theory level (30 states, singlets only).
- **Part 9** - X3LYP/6-31+G(d,p)/PCM(DMSO) energies of the optimized structures of **1-GHB** derivatives with hydrogen bonds between the thiourea and carboxylate moieties and between the N<sub>3</sub>-deprotonated thiourea and the carboxylic acid group.
- **Part 10** - X3LYP/6-31+G(d,p)/PCM(DMSO) energies of the optimized structures of **2-GHB** derivatives with hydrogen bonds between the thiourea and carboxylate moieties and between the N<sub>3</sub>-deprotonated thiourea and the carboxylic acid group.
- **Part 11** - Simulated UV-Vis spectra from the TD-DFT vertical excitation energies analysis of X3LYP/6-31+G(d,p)/PCM(DMSO) **1-GHB** optimized geometries at the same theory level (15 states, singlets only).
- **Part 12** - Simulated UV-Vis spectra from the TD-DFT vertical excitation energies analysis of X3LYP/6-31+G(d,p)/PCM(DMSO) **2-GHB** optimized geometries at the same theory level (15 states, singlets only).
- **Part 13** - X3LYP/6-31+G(d,p)/PCM(DMSO) energies of the optimized structures for chemosensor **2-GHB** with and without hydrogen bond between the hydroxyacid carboxylate and thiourea moiety with increasing hydroxyacid chain (3 to 7 carbon atoms).
- **Part 14** – X3LYP/6-31+G(d,p)/PCM(DMSO) energies of butyric acid and 1-methyl-3-(4-nitrophenyl)thiourea in different hydrogen-bonded complexes in different protonation states.
- **Annex I**: XYZ cartesian coordinates of the optimized energies of 32 starting rotamers of chemosensor **1**.
- **Annex II**: XYZ cartesian coordinates of the optimized energies of 28 starting rotamers of chemosensor **1**.
- **Annex III**: XYZ cartesian coordinates of the optimized energies of several **1-GHB** geometries bearing different hydrogen bonding modes between the thiourea and carboxylate moieties.
- **Annex IV**: XYZ cartesian coordinates of the optimized energies of several **2-GHB** geometries bearing different hydrogen bonding modes between the thiourea and carboxylate moieties.
- **Annex V**: XYZ cartesian coordinates of the optimized energies of the two **2-GHB** series (with and without hydrogen bond) with increasing hydroxyacid chain.

#### Part 1 - Computational methods.

In order to gain insight in the behavior of chemosensors **1** and **2** with and without the presence of GHB, DFT calculations have been carried out using Gaussian09 rev. D01 program package[a] and GaussView 5 [b] was employed to visualize the results. The geometrical optimization was performed using the X3LYP hybrid DFT functional of Xu and Goddard[c] which accounts for the accurate description of nonbonding interactions as those we are dealing here with **1-GHB** and **2-GHB** structures. The double- $\zeta$  6-31+G(d,p) basis set[d] was used in the optimization of the real systems although for the sake of simplicity, 6-31G(d) basis set was used to perform the relaxed PES scan along the dihedral angle of both NH-C thiourea bonds at the reduced and complete

models. To take into account the effect of the solvent, DMSO, PCM solvation model was used[e]. Frequency calculations were performed over optimized structures to properly characterize minima structures (no imaginary frequencies).

On the other hand, to explore the electronic transitions responsible for the UV-Vis spectra, vertical excitation energies were computed over X3LYP/6-31+G(d,p)/PCM(DMSO) geometries through single-point TD-DFT[f] calculations (15 states, singlets only) in solution using non-equilibrium formalism at the same theory level. Geometry details of all optimized geometries as well as excitation energies, oscillator strengths, spin and spatial symmetry,  $S^2$  and largest coefficients in the CI expansion for all TD-DFT vertical excitation energies computed for **1**, **2**, **1-GHB** and **2-GHB** geometries can be found in the different Annex sections.

[a] Gaussian 09, Revision D.01. See complete reference at the beginning of the theoretical calculations at the Supporting Information.

[b] GaussView, Version 5, Roy Dennington, Todd Keith, and John Millam, Semichem Inc., Shawnee Mission, KS, 2009.

[c] X. Xu, W. A. Goddard III, Proc. Natl. Acad. Sci. USA, 101 (2004) 2673-77.

[d] a) G. A. Petersson, A. Bennett, T. G. Tensfeldt, M. A. Al-Laham, W. A. Shirley, and J. Mantzaris, "A complete basis set model chemistry. I. The total energies of closed-shell atoms and hydrides of the first-row atoms," J. Chem. Phys., 89 (1988) 2193-218. b) G. A. Petersson and M. A. Al-Laham, "A complete basis set model chemistry. II. Open-shell systems and the total energies of the first-row atoms," J. Chem. Phys., 94 (1991) 6081-90. c) A. D. McLean and G. S. Chandler, "Contracted Gaussian-basis sets for molecular calculations. 1. 2nd row atoms, Z=11-18," J. Chem. Phys., 72 (1980) 5639-48. d) K. Raghavachari, J. S. Binkley, R. Seeger, and J. A. Pople, "Self-Consistent Molecular Orbital Methods. 20. Basis set for correlated wave-functions," J. Chem. Phys., 72 (1980) 650-54. e) J.-P. Blaudeau, M. P. McGrath, L. A. Curtiss, and L. Radom, "Extension of Gaussian-2 (G2) theory to molecules containing third-row atoms K and Ca," J. Chem. Phys., 107 (1997) 5016- 21. f) A. J. H. Wachters, "Gaussian basis set for molecular wavefunctions containing third-row atoms," J. Chem. Phys., 52 (1970) 1033. g) P. J. Hay, "Gaussian basis sets for molecular calculations – representation of 3D orbitals in transition-metal atoms," J. Chem. Phys., 66 (1977) 4377-84. h) K. Raghavachari and G. W. Trucks, "Highly correlated systems: Excitation energies of first row transition metals Sc-Cu," J. Chem. Phys., 91 (1989) 1062-65. i) R. C. Binning Jr. and L. A. Curtiss, 16 "Compact contracted basis-sets for 3rd-row atoms – GA-KR," J. Comp. Chem., 11 (1990) 1206-16. j) M. P. McGrath and L. Radom, "Extension of Gaussian-1 (G1) theory to bromine-containing molecules," J. Chem. Phys., 94 (1991) 511-16. k) L. A. Curtiss, M. P. McGrath, J.-P. Blaudeau, N. E. Davis, R. C. Binning Jr., and L. Radom, "Extension of Gaussian-2 theory to molecules containing third-row atoms Ga-Kr," J. Chem. Phys., 103 (1995) 6104-13.

[e] G. Scalmani and M. J. Frisch, "Continuous surface charge polarizable continuum models of solvation. I. General formalism," J. Chem. Phys., 132 (2010) 114110.

[f] a) C. Adamo and D. Jacquemin, "The calculations of excited-state properties with Time-Dependent Density Functional Theory," Chem. Soc. Rev., 2013, 42, 845. b) A. D. Laurent, C. Adamo, D. Jacquemin, "Dye chemistry with time-dependent density functional theory," Phys. Chem. Chem. Phys., 2014, 16, 14334-56.

**Part 2** –X3LYP/6-31G(d)/PCM(DMSO) energy profile of the dihedral bond rotation from Z to E rotamer for both NH-C thiourea bonds (N3H-C, left and N1H-C, right) at the reduced 1-methyl-3-(4-nitrophenyl)thiourea model. The energy difference between the first and the most energetic rotamer in the profile is 6.5 (N<sub>3</sub>H-C) and 17.2 kcal/mol (N<sub>1</sub>H-C), respectively.

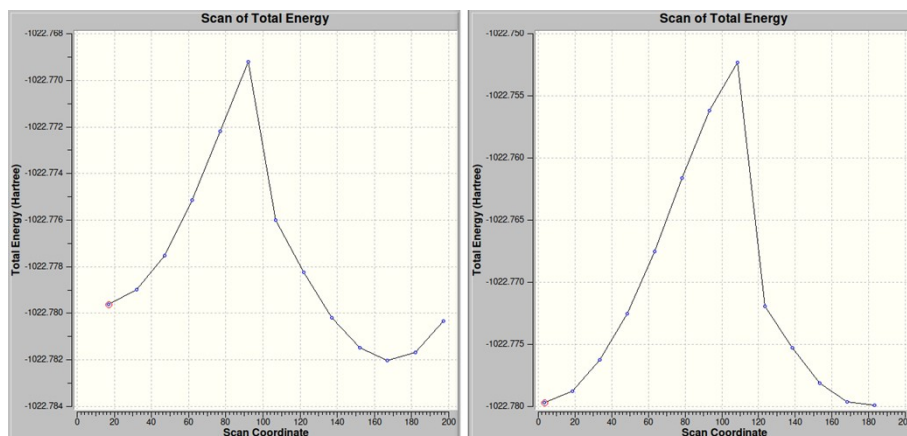

**Figure S29.** N<sub>3</sub>H-C (left) and N<sub>1</sub>H-C (right) energy profile of the dihedral bond-rotation from Z to E rotamer at 1-methyl-3-(4-nitrophenyl)thiourea.

**Part 3** –X3LYP/6-31G(d)/PCM(DMSO) energy profile of the dihedral bond rotation from Z to E rotamer for both NH-C thiourea bonds (N3H-C, left and N1H-C, right) at chemosensor **1**. The energy difference between the first and the most energetic rotamer in the profile is 5.5 (N<sub>3</sub>H-C) and 13.9 kcal/mol (N<sub>1</sub>H-C), respectively.

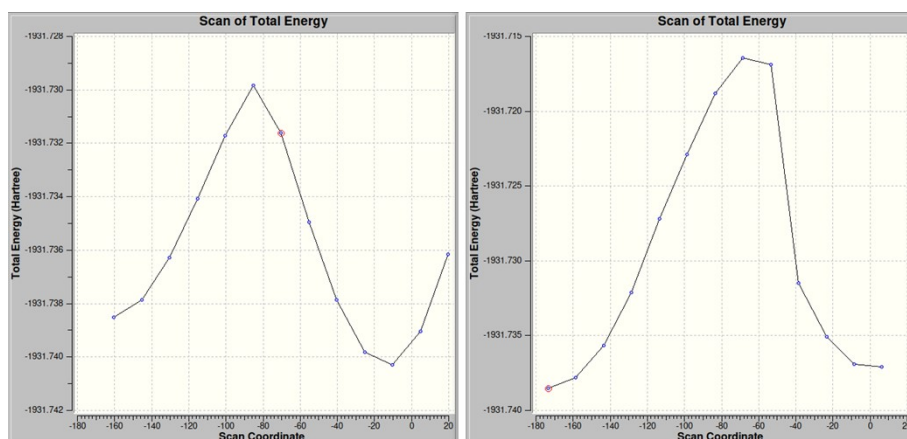

**Figure S30.** N<sub>3</sub>H-C (left) and N<sub>1</sub>H-C (right) energy profile of the dihedral bond-rotation from Z to E rotamer at chemosensor **1**.

**Part 4** –X3LYP/6-31G(d)/PCM(DMSO) energy profile of the dihedral bond rotation from Z to E rotamer for both NH-C thiourea bonds (N3H-C, left and N1H-C, right) at chemosensor **2**. The energy difference between the first and the most energetic rotamer in the profile is 5.5 (N<sub>3</sub>H-C) and 13.9 kcal/mol (N<sub>1</sub>H-C), respectively.

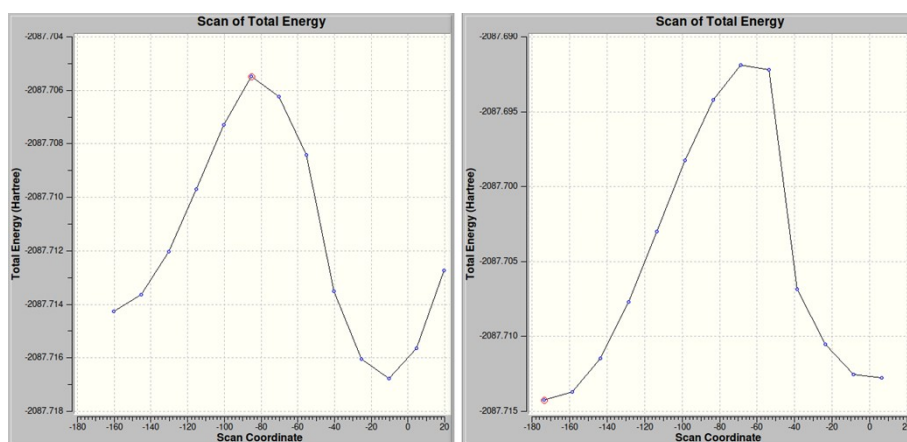

**Figure S31.**  $N_3H-C$  (left) and  $N_1H-C$  (right) energy profile of the dihedral bond-rotation from Z to E rotamer at chemosensor **2**.

**Part 5** -X3LYP/6-31+G(d,p)/PCM(DMSO) energy and (C=O)-(C=S) distance of the optimized structures of the rotamers found along the full-search of the PES for chemosensor 1.

**Table S3.** X3LYP/6-31+G(d,p)/PCM(DMSO) energy (E, in hartrees), energy difference ( $\Delta E$ , in kcal/mol) with respect to the most stable structure and distance between C=O of trifluoromethyl acetate group and C=S thiourea carbon atoms ( $d_{(C=O)-(C=S)}$ , in angstroms) for the optimized structures of chemosensor **1** rotamers.

| Structure       | E<br>(hartrees) | $\Delta E$<br>(kcal/mol) | $d_{(C=O)-(C=S)}$<br>( $\text{\AA}$ ) |
|-----------------|-----------------|--------------------------|---------------------------------------|
| <b>1-conf1</b>  | -1931,820057    | 10,6                     | 8,14                                  |
| <b>1-conf2</b>  | -1931,833730    | 2,0                      | 10,83                                 |
| <b>1-conf3</b>  | -1931,821545    | 9,6                      | 8,08                                  |
| <b>1-conf4</b>  | -1931,835218    | 1,1                      | 10,82                                 |
| <b>1-conf5</b>  | -1931,818129    | 11,8                     | 7,93                                  |
| <b>1-conf6</b>  | -1931,831972    | 3,1                      | 10,87                                 |
| <b>1-conf7</b>  | -1931,815870    | 13,2                     | 8,67                                  |
| <b>1-conf8</b>  | -1931,829810    | 4,5                      | 10,98                                 |
| <b>1-conf9</b>  | -1931,820038    | 10,6                     | 9,40                                  |
| <b>1-conf10</b> | -1931,834990    | 1,2                      | 9,43                                  |
| <b>1-conf11</b> | -1931,823127    | 8,7                      | 9,39                                  |
| <b>1-conf12</b> | -1931,836035    | 0,6                      | 8,15                                  |
| <b>1-conf13</b> | -1931,823717    | 8,3                      | 9,11                                  |
| <b>1-conf14</b> | -1931,833079    | 2,4                      | 8,07                                  |
| <b>1-conf15</b> | -1931,817851    | 12,0                     | 9,22                                  |
| <b>1-conf16</b> | -1931,831860    | 3,2                      | 8,40                                  |
| <b>1-conf17</b> | -1931,820042    | 10,6                     | 9,22                                  |
| <b>1-conf18</b> | -1931,834246    | 1,7                      | 8,16                                  |
| <b>1-conf19</b> | -1931,821940    | 9,4                      | 9,40                                  |
| <b>1-conf20</b> | -1931,836066    | 0,5                      | 8,23                                  |
| <b>1-conf21</b> | -1931,823759    | 8,3                      | 9,13                                  |
| <b>1-conf22</b> | -1931,834246    | 1,7                      | 8,05                                  |
| <b>1-conf23</b> | -1931,817851    | 12,0                     | 9,22                                  |
| <b>1-conf24</b> | -1931,831879    | 3,2                      | 8,39                                  |
| <b>1-conf25</b> | -1931,821427    | 9,7                      | 9,42                                  |
| <b>1-conf26</b> | -1931,835008    | 1,2                      | 9,44                                  |

|                 |              |      |      |
|-----------------|--------------|------|------|
| <b>1-conf27</b> | -1931,823127 | 8,7  | 9,39 |
| <b>1-conf28</b> | -1931,836917 | 0,0  | 9,39 |
| <b>1-conf29</b> | -1931,819072 | 11,2 | 9,36 |
| <b>1-conf30</b> | -1931,833163 | 2,4  | 9,26 |
| <b>1-conf31</b> | -1931,818218 | 11,7 | 9,83 |
| <b>1-conf32</b> | -1931,832086 | 3,0  | 9,49 |

**Part 6** -X3LYP/6-31+G(d,p)/PCM(DMSO) energy and (C=O)-(C=S) distance of the optimized structures of the rotamers found along the full-search of the PES for chemosensor **2**.

**Table S4.** X3LYP/6-31+G(d,p)/PCM(DMSO) energy (*E*, in hartrees), energy difference ( $\Delta E$ , in kcal/mol) with respect to the most stable structure and distance between C=O of trifluoromethyl acetate group and C=S thiourea carbon atoms ( $d_{(C=O)-(C=S)}$ , in angstroms) for the optimized structures of chemosensor **2** rotamers.

| <b>Structure</b> | <b><i>E</i><br/>(hartrees)</b> | <b><math>\Delta E</math><br/>(kcal/mol)</b> | <b><math>d_{(C=O)-(C=S)}</math><br/>(Å)</b> |
|------------------|--------------------------------|---------------------------------------------|---------------------------------------------|
| <b>2-conf1</b>   | -2087,804293                   | 12,1                                        | 7,20                                        |
| <b>2-conf2</b>   | -2087,805636                   | 11,3                                        | 7,29                                        |
| <b>2-conf3</b>   | -2087,803340                   | 12,7                                        | 7,03                                        |
| <b>2-conf4</b>   | -2087,800198                   | 14,7                                        | 7,06                                        |
| <b>2-conf5</b>   | -2087,804254                   | 12,1                                        | 7,24                                        |
| <b>2-conf6</b>   | -2087,805538                   | 11,3                                        | 7,35                                        |
| <b>2-conf7</b>   | -2087,803070                   | 12,9                                        | 7,05                                        |
| <b>2-conf8</b>   | -2087,800157                   | 14,7                                        | 7,04                                        |
| <b>2-conf9</b>   | -2087,817794                   | 3,6                                         | 10,52                                       |
| <b>2-conf10</b>  | -2087,819088                   | 2,8                                         | 10,48                                       |
| <b>2-conf11</b>  | -2087,816545                   | 4,4                                         | 10,57                                       |
| <b>2-conf12</b>  | -2087,813976                   | 6,0                                         | 10,51                                       |
| <b>2-conf13</b>  | -2087,815185                   | 5,3                                         | 8,49                                        |
| <b>2-conf14</b>  | -2087,817538                   | 3,8                                         | 8,61                                        |
| <b>2-conf15</b>  | -2087,815219                   | 5,2                                         | 8,38                                        |
| <b>2-conf16</b>  | -2087,807389                   | 10,2                                        | 7,84                                        |
| <b>2-conf17</b>  | -2087,810663                   | 8,1                                         | 8,32                                        |
| <b>2-conf18</b>  | -2087,812682                   | 6,8                                         | 8,54                                        |
| <b>2-conf19</b>  | -2087,810178                   | 8,4                                         | 8,32                                        |
| <b>2-conf20</b>  | -2087,803182                   | 12,8                                        | 9,09                                        |
| <b>2-conf21</b>  | -2087,815893                   | 4,8                                         | 8,43                                        |
| <b>2-conf22</b>  | -2087,817592                   | 3,8                                         | 8,45                                        |
| <b>2-conf23</b>  | -2087,818135                   | 3,4                                         | 8,56                                        |
| <b>2-conf24</b>  | -2087,811224                   | 7,8                                         | 9,07                                        |
| <b>2-conf25</b>  | -2087,821879                   | 1,1                                         | 8,63                                        |
| <b>2-conf26</b>  | -2087,823581                   | 0,0                                         | 8,77                                        |
| <b>2-conf27</b>  | -2087,820226                   | 2,1                                         | 8,84                                        |
| <b>2-conf28</b>  | -2087,817651                   | 3,7                                         | 9,03                                        |

**Part 7** -Simulated UV-Vis spectra of selected optimized geometries of rotamers of **1**.

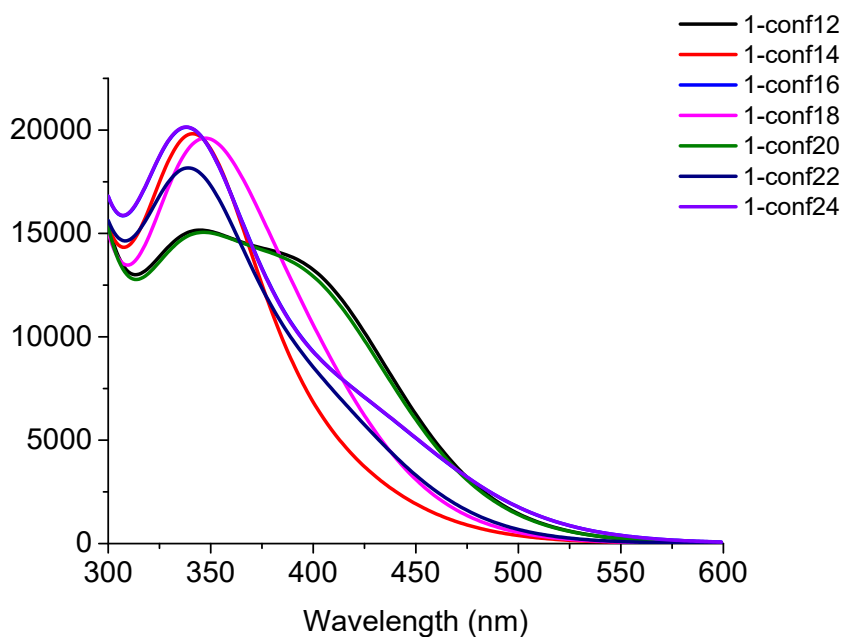

**Figure S32.** Simulated UV-Vis spectra from the TD-DFT vertical excitation energies analysis of selected X3LYP/6-31+G(d,p)/PCM(DMSO) optimized geometries of rotamers of **1** at the same theory level (15 states, singlets only). Please, note that the main band is centered around 340-350 nm and that whenever  $N_3H-C$  thiourea bond adopts an *E* conformation (see **1-conf12** and **1-conf20**), a shoulder at 390 nm appears, which is not seen at the experimental UV-Vis spectra, fact that agrees with the appearance of *Z,Z*-rotamers (the ones that enables chemosensors to establish readily an effective hydrogen-bond interaction with the carboxylate of GHB) as the main ones.

**Part 8** -Simulated UV-Vis spectra of selected optimized geometries of rotamers of **2**.

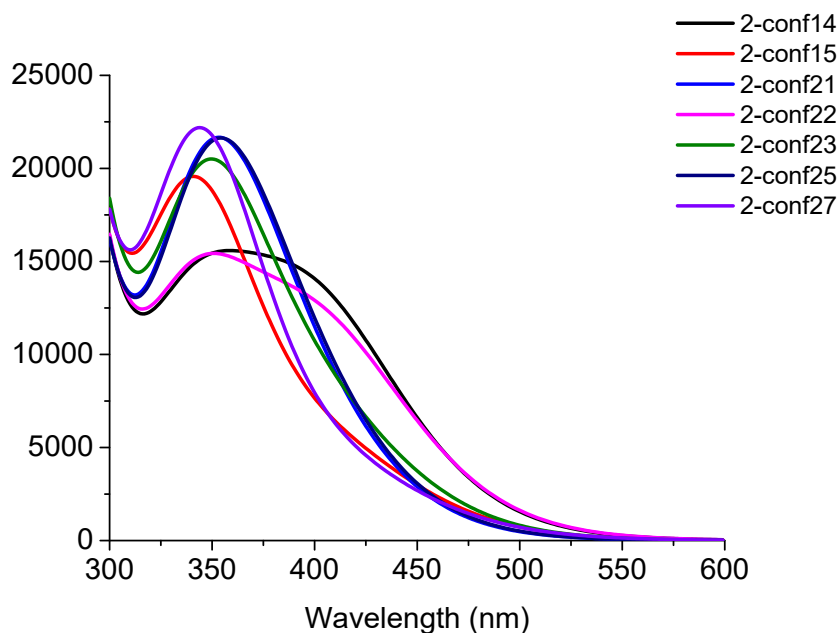

**Figure S33.** Simulated UV-Vis spectra from the TD-DFT vertical excitation energies analysis of selected X3LYP/6-31+G(d,p)/PCM(DMSO) optimized geometries of rotamers of **2** at the same theory level (15 states, singlets only). Please, note that the main band is centered around 340-350 nm and that whenever N<sub>3</sub>H-C thiourea bond adopts an *E* conformation (see **1-conf14** and **1-conf22**), a shoulder at 390 nm appears, which is not seen at the experimental UV-Vis spectra, fact that agrees with the appearance of *Z,Z*- rotamers (the ones that enables chemosensors to establish readily an effective hydrogen-bond interaction with the carboxylate of GHB) as the main ones.

**Part 9** - X3LYP/6-31+G(d,p)/PCM(DMSO) energies of the optimized structures of 1-GHB derivatives with hydrogen bonds between the thiourea and carboxylate moieties and between the N<sub>3</sub>-deprotonated thiourea and the carboxylic acid group.

**Table S5.** X3LYP/6-31+G(d,p)/PCM(DMSO) energy (*E*, in hartrees), relative energy ( $\Delta E$ , in kcal/mol) and hydrogen-bond type, of the optimized structures of **1-GHB** derivatives with single/double hydrogen bonds between the thiourea and carboxylate or between the N<sub>3</sub>-deprotonated thiourea and the carboxylic acid group.

| Structure      | <i>E</i><br>(hartrees) | $\Delta E$<br>(kcal/mol) | Hydrogen-bond<br>type                                             |
|----------------|------------------------|--------------------------|-------------------------------------------------------------------|
| <b>1-GHB-a</b> | -2314,199679           | 0,00                     | double HB (carboxylate-thiourea)                                  |
| <b>1-GHB-b</b> | -2314,191321           | 5,24                     | double HB (carboxylate-thiourea)                                  |
| <b>1-GHB-c</b> | -2314,195948           | 2,34                     | double HB (carboxylate-thiourea)                                  |
| <b>1-GHB-d</b> | -2314,184309           | 9,64                     | single HB (carboxylate-thiourea)                                  |
| <b>1-GHB-e</b> | -2314,181783           | 11,23                    | double HB (carboxylic acid-N <sub>3</sub> -deprotonated thiourea) |
| <b>1-GHB-f</b> | -2314,190573           | 5,71                     | double HB (carboxylic acid-N <sub>3</sub> -deprotonated thiourea) |
| <b>1-GHB-g</b> | -2314,186472           | 8,29                     | double HB (carboxylic acid-N <sub>3</sub> -deprotonated thiourea) |



**Part 10** - X3LYP/6-31+G(d,p)/PCM(DMSO) energies of the optimized structures of 2-GHB derivatives with hydrogen bonds between the thiourea and carboxylate moieties and between the N3-deprotonated thiourea and the carboxylic acid group.

**Table S6.** X3LYP/6-31+G(d,p)/PCM(DMSO) energy (*E*, in hartrees), relative energy ( $\Delta E$ , in kcal/mol) and hydrogen-bond type, of the optimized structures of **2-GHB** derivatives with single/double hydrogen bonds between the thiourea and carboxylate or between the N<sub>3</sub>-deprotonated thiourea and the carboxylic acid group.

| Structure      | <i>E</i><br>(hartrees) | $\Delta E$<br>(kcal/mol) | Hydrogen-bond<br>type                                |
|----------------|------------------------|--------------------------|------------------------------------------------------|
| <b>2-GHB-a</b> | -2470,1733572          | 0,18                     | double HB (carboxylate-thiourea)                     |
| <b>2-GHB-b</b> | -2470,1736486          | 0,00                     | double HB (carboxylate-thiourea)                     |
| <b>2-GHB-c</b> | -2470,1715432          | 1,32                     | single HB (carboxylate-thiourea)                     |
| <b>2-GHB-d</b> | -2470,1664388          | 4,52                     | single HB (carboxylate-thiourea)                     |
| <b>2-GHB-e</b> | -2470,1646541          | 5,64                     | double HB (carboxylic acid-N3-deprotonated thiourea) |
| <b>2-GHB-f</b> | -2470,1651804          | 5,31                     | double HB (carboxylic acid-N3-deprotonated thiourea) |
| <b>2-GHB-g</b> | -2470,1660697          | 4,76                     | single HB (carboxylic acid-N3-deprotonated thiourea) |
| <b>2-GHB-h</b> | -2470,1586224          | 9,43                     | single HB (carboxylic acid-N3-deprotonated thiourea) |

**Part 11** - Simulated UV-Vis spectra of selected optimized geometries of rotamers of **1-GHB** derivatives.

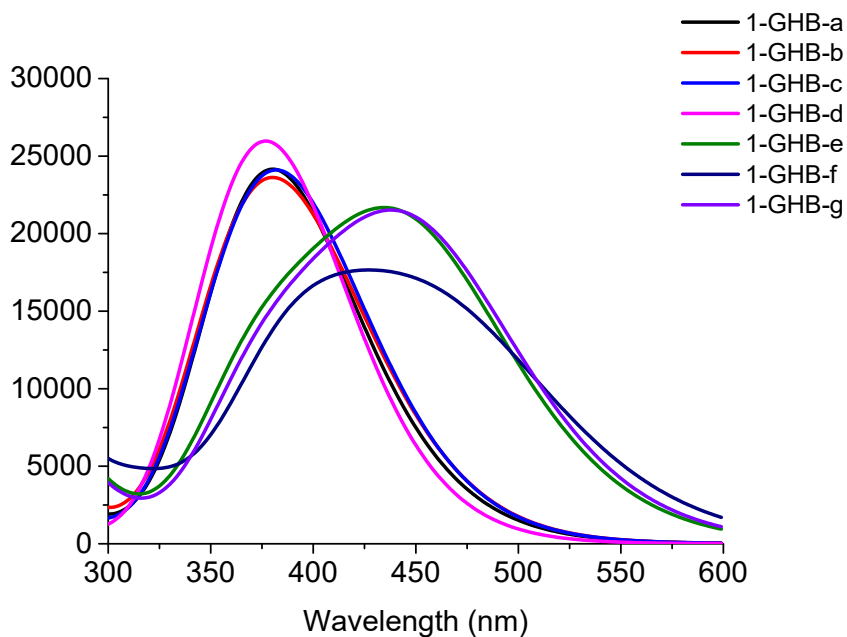

**Figure S34.** Simulated UV-Vis spectra from the TD-DFT vertical excitation energies analysis of selected X3LYP/6-31+G(d,p)/PCM(DMSO) optimized geometries of rotamers of **1-GHB** derivatives at the same theory level (15 states, singlets only). Please, note that the main band is centered around 380 nm for species where the hydrogen bond takes place between the thiourea moiety and the carboxylate (**1-GHB-a to 1-GHB-d**) regardless of the number of hydrogen bonds formed and the main band is centered around 430-440 nm for species where the hydrogen bond takes place between the N<sub>3</sub>-deprotonated thiourea and the carboxylic acid group (**1-GHB-e to 1-GHB-g**).

**Part 12** - Simulated UV-Vis spectra of selected optimized geometries of rotamers of **2-GHB** derivatives.

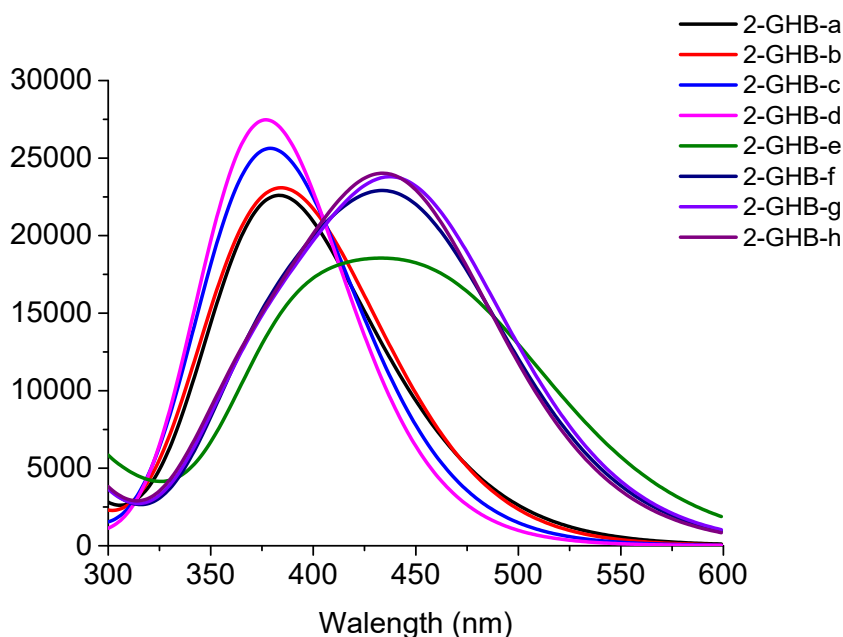

**Figure S35.** Simulated UV-Vis spectra from the TD-DFT vertical excitation energies analysis of selected X3LYP/6-31+G(d,p)/PCM(DMSO) optimized geometries of rotamers of **2-GHB** derivatives at the same theory level (15 states, singlets only). Please, note that the main band is centered around 380 nm for species where the hydrogen bond takes place between the thiourea moiety and the carboxylate (**2-GHB-a to 2-GHB-d**) regardless of the number of hydrogen bonds formed and the main band is centered around 430-440 nm for species where the hydrogen bond takes place between the N<sub>3</sub>-deprotonated thiourea and the carboxylic acid group (**2-GHB-e to 2-GHB-h**).

**Part 13** - X3LYP/6-31+G(d,p)/PCM(DMSO) absolute ( $E$ , in hartrees) and relative ( $\Delta E$ , in kcal/mol) of chemosensor 2-GHB-a (double hydrogen bond between thiourea and carboxylate) and 2-GHB-a' (no hydrogen bond, equivalent 1,2-trans cyclohexane ring substituents, Z,Z- thiourea and ester conformations) of increasing hydroxyacid chain.

**Table S7.** X3LYP/6-31+G(d,p)/PCM(DMSO) energy ( $E$ , in hartrees), relative energy ( $\Delta E$ , in kcal/mol) and hydrogen-bond type, of the optimized structures of 2-GHB derivatives with (2-GHB-a) and without (2-GHB-a') double hydrogen bonds between the thiourea and carboxylate of increasing hydroxyacid chain (3 to 7 carbon atoms, noted as XC) with equivalent conformations of cyclohexane ring substituents, thiourea moiety and ester group. Please, note that the lowest stabilization due to the hydrogen bond formation takes place at the 3-hydroxypropionate, is maximum at GHB and, from there, decreases.

| Structure   | $E$ (hartrees) | $\Delta E$ (2-GHB-a vs 2-GHB-a') (kcal/mol) |
|-------------|----------------|---------------------------------------------|
| 2-GHB-a(3C) | -2430,872711   | 4,02                                        |
| 2-GHB-a     | -2470,173357   | 0,09                                        |
| 2-GHB-a(5C) | -2509,467970   | 0,56                                        |
| 2-GHB-a(6C) | -2548,762117   | 1,50                                        |
| 2-GHB-a(7C) | -2588,057222   | 1,82                                        |

|                     |              |
|---------------------|--------------|
| <b>2-GHB-a'(3C)</b> | -2430,879116 |
| <b>2-GHB-a'</b>     | -2470,173500 |
| <b>2-GHB-a'(5C)</b> | -2509,468869 |
| <b>2-GHB-a'(6C)</b> | -2548,764502 |
| <b>2-GHB-a'(7C)</b> | -2588,060122 |

**Part 14** –Stabilization of butyric acid and 1-methyl-3-(4-nitrophenyl)thiourea in different hydrogen-bonded complexes and protonation states.

**Table S8.** X3LYP/6-31+G(d,p)/PCM(DMSO) energy (E, in hartrees), relative energy ( $\Delta E$ , in kcal/mol) of butyric acid/butyrate, 1-methyl-3-(4-nitrophenyl)thiourea and N<sub>3</sub>-deprotonated 1-methyl-3-(4-nitrophenyl)thiourea in different hydrogen-bonded complexes.

| Structure                                              | E<br>(hartrees) | $\Delta E$ (kcal/mol) | Hydrogen bond        |
|--------------------------------------------------------|-----------------|-----------------------|----------------------|
| <b>butyrate</b>                                        | -307,14534413   |                       |                      |
| <b>butyric acid</b>                                    | -307,61249807   |                       |                      |
| <b>1-methyl-3-(4-nitrophenyl)thiourea</b>              | -1022,82522452  |                       |                      |
| <b>N<sub>3</sub>-deprotonated thiourea</b>             | -1022,35725196  |                       |                      |
| <b>acid + thiourea<sub>conformation 1</sub></b>        | -1330,44706964  | -5,87                 | single hydrogen bond |
| <b>acid + thiourea<sub>conformation 2</sub></b>        | -1330,44612229  | -5,27                 | single hydrogen bond |
| <b>carboxylate + thiourea<sub>conformation 1</sub></b> | -1329,99267431  | -13,87                | single hydrogen bond |
| <b>carboxylate + thiourea<sub>conformation 2</sub></b> | -1329,99140705  | -13,08                | single hydrogen bond |
| <b>carboxylate + thiourea<sub>conformation 3</sub></b> | -1329,99773512  | -17,05                | double hydrogen bond |
| <b>carboxylate + thiourea<sub>conformation 4</sub></b> | -1329,99773511  | -17,05                | double hydrogen bond |
| <b>acid + N<sub>3</sub>-deprotonated thiourea</b>      | -1329,98884260  | -11,98                | double hydrogen bond |

**Annex I: XYZ cartesian coordinates of the optimized energies of 32 starting rotamers of chemosensor 1 (1-conf1 to 1-conf32).**

**1-conf1**

|   |             |             |             |
|---|-------------|-------------|-------------|
| C | -0.84887900 | 2.91940100  | 0.61635600  |
| C | 0.44303800  | 3.64159000  | 0.22984900  |
| H | 0.50358900  | 3.73840300  | -0.85548300 |
| N | 1.61221500  | 2.92354400  | 0.71417100  |
| H | -0.88405600 | 1.92857900  | 0.16159400  |
| O | -1.93278200 | 3.74540400  | 0.12192000  |
| H | 1.98879000  | 3.23071900  | 1.60282500  |
| C | -3.09008000 | 3.24423000  | -0.34520000 |
| O | -3.82661700 | 3.97019000  | -0.98688100 |
| C | -3.46363900 | 1.82256700  | -0.04119200 |
| C | -3.91025000 | 1.01476100  | -1.09410100 |
| C | -4.33120500 | -0.28855000 | -0.84728900 |
| C | -4.33465700 | -0.78908300 | 0.46645200  |
| C | -3.90614600 | 0.03469100  | 1.52268100  |
| C | -3.46514000 | 1.32738800  | 1.27214200  |
| C | 2.23385100  | 1.91044800  | 0.06643700  |
| N | 3.24904700  | 1.35178800  | 0.81378200  |
| S | 1.75991000  | 1.38087200  | -1.46700300 |
| C | 4.24751500  | 0.43101300  | 0.47691300  |
| C | 4.80710400  | -0.30781900 | 1.53956800  |
| C | 5.83398000  | -1.20924900 | 1.31326600  |
| C | 6.30954700  | -1.37840700 | 0.00932300  |
| C | 5.77840400  | -0.64701700 | -1.05616600 |
| C | 4.75293600  | 0.25972000  | -0.82503200 |
| F | -6.34209200 | -2.57968600 | -0.96505700 |
| C | -5.27280300 | -3.10569800 | -0.32386200 |
| F | -5.63461000 | -4.29785800 | 0.16380900  |
| F | -4.30265000 | -3.31296800 | -1.24416200 |
| N | 7.37995800  | -2.32581800 | -0.23982800 |
| O | 7.76999800  | -2.48349400 | -1.40326100 |
| O | 7.86089800  | -2.93843300 | 0.72161700  |
| H | -3.92342600 | 1.40604900  | -2.10503200 |
| H | -4.65741600 | -0.89633400 | -1.68148700 |
| H | -3.92317900 | -0.35146900 | 2.53519100  |
| H | -3.14519300 | 1.95173000  | 2.09894400  |
| H | 3.23195800  | 1.57973400  | 1.80161400  |
| H | 4.42498300  | -0.17631500 | 2.54689600  |
| H | 6.25775100  | -1.78168900 | 2.12798900  |
| H | 6.17623900  | -0.77860200 | -2.05415800 |
| H | 4.34983100  | 0.83470300  | -1.64495400 |
| C | -4.77744200 | -2.15957700 | 0.81444100  |
| O | -4.78316900 | -2.60702600 | 1.94490200  |
| H | 0.45916300  | 4.63902500  | 0.67411800  |
| H | -0.93539500 | 2.83395700  | 1.70192800  |

**1-conf2**

|   |             |             |             |
|---|-------------|-------------|-------------|
| C | -0.06916200 | -0.94576700 | -0.57962500 |
| C | -0.84667800 | -0.02449300 | -1.51699600 |
| H | -0.76869900 | 1.00958100  | -1.17780400 |
| N | -2.25191100 | -0.39911000 | -1.57420900 |
| H | -0.45083000 | -0.88578700 | 0.44225400  |
| O | 1.29971300  | -0.48177800 | -0.60598800 |

|   |              |             |             |
|---|--------------|-------------|-------------|
| H | -2.51001300  | -1.05124300 | -2.30503000 |
| C | 2.19088600   | -1.17999200 | 0.11381500  |
| O | 1.90047500   | -2.16556000 | 0.77048100  |
| C | 3.57339700   | -0.61814500 | 0.01966200  |
| C | 4.60037800   | -1.27834300 | 0.70502300  |
| C | 5.90453200   | -0.79712400 | 0.64819100  |
| C | 6.19367300   | 0.35882100  | -0.09869800 |
| C | 5.15776100   | 1.01952100  | -0.78404100 |
| C | 3.85739500   | 0.53591300  | -0.72741800 |
| C | -3.22149300  | 0.05544400  | -0.74772300 |
| N | -4.43420500  | -0.56547900 | -0.96436500 |
| S | -2.93991300  | 1.22060500  | 0.44449100  |
| C | -5.71353800  | -0.27145800 | -0.47787000 |
| C | -6.62332800  | -1.34435200 | -0.39245700 |
| C | -7.92559000  | -1.13691300 | 0.03266700  |
| C | -8.32534700  | 0.15732100  | 0.37838500  |
| C | -7.44355400  | 1.23773800  | 0.28730400  |
| C | -6.14140800  | 1.02670400  | -0.14443800 |
| F | 8.53277100   | 0.17701200  | 1.85439600  |
| C | 8.73893900   | 0.22592000  | 0.51792200  |
| F | 9.89125200   | 0.87220400  | 0.30605000  |
| F | 8.89151500   | -1.04478000 | 0.07834900  |
| N | -9.68454100  | 0.38357300  | 0.83395700  |
| O | -10.01543300 | 1.53100900  | 1.15707000  |
| O | -10.45902500 | -0.58017700 | 0.88082500  |
| H | 4.36949500   | -2.16790200 | 1.27923300  |
| H | 6.67982100   | -1.32713700 | 1.18644800  |
| H | 5.38760700   | 1.91014800  | -1.35726200 |
| H | 3.06355500   | 1.04767200  | -1.25713700 |
| H | -4.38940500  | -1.43551400 | -1.48336700 |
| H | -6.29942700  | -2.34681900 | -0.65313700 |
| H | -8.62185700  | -1.96198400 | 0.10721500  |
| H | -7.78153900  | 2.23468100  | 0.53919800  |
| H | -5.46191100  | 1.86162900  | -0.22873000 |
| C | 7.55444500   | 0.93567400  | -0.21022000 |
| O | 7.81875700   | 1.94024000  | -0.84193300 |
| H | -0.44348600  | -0.09329000 | -2.52983900 |
| H | -0.10367000  | -1.98520200 | -0.91528500 |

### 1-conf3

|   |             |             |             |
|---|-------------|-------------|-------------|
| C | 0.02285200  | 2.09523100  | -0.86711400 |
| C | -1.15239500 | 2.85044400  | -0.24441200 |
| H | -0.79465200 | 3.48975000  | 0.56482700  |
| N | -2.15337800 | 1.92631200  | 0.27386900  |
| H | 0.52015100  | 1.47848600  | -0.11753000 |
| O | 0.92480200  | 3.10877000  | -1.37628200 |
| H | -2.96939100 | 1.77826400  | -0.30609600 |
| C | 2.26460900  | 3.00696400  | -1.31588600 |
| O | 2.93719900  | 4.00298900  | -1.50685300 |
| C | 2.89927400  | 1.67295100  | -1.05073800 |
| C | 3.90009900  | 1.59594800  | -0.07460200 |
| C | 4.56117600  | 0.39336200  | 0.15698200  |
| C | 4.24506500  | -0.74150400 | -0.61027100 |
| C | 3.25476600  | -0.65162000 | -1.60483200 |
| C | 2.57872000  | 0.54242600  | -1.81820500 |
| C | -2.13873900 | 1.39208200  | 1.50880300  |

|   |             |             |             |
|---|-------------|-------------|-------------|
| N | -3.16429800 | 0.53987900  | 1.84450000  |
| S | -0.95566400 | 1.73924900  | 2.67547700  |
| C | -4.16182200 | -0.06184500 | 1.06053600  |
| C | -5.40451500 | -0.31572700 | 1.67268700  |
| C | -6.41759300 | -0.95103000 | 0.97246300  |
| C | -6.18991900 | -1.32990200 | -0.35400500 |
| C | -4.96114500 | -1.10247500 | -0.97617000 |
| C | -3.94392000 | -0.47679800 | -0.26682200 |
| F | 7.03822400  | -1.36386000 | 0.45199400  |
| C | 6.00158900  | -2.20581500 | 0.67082100  |
| F | 6.48705200  | -3.45222200 | 0.70043800  |
| F | 5.49850500  | -1.92917200 | 1.89602900  |
| N | -7.25257100 | -1.98678800 | -1.09827400 |
| O | -7.04199700 | -2.29379600 | -2.27690300 |
| O | -8.32208700 | -2.21069200 | -0.52061000 |
| H | 4.15582200  | 2.47535200  | 0.50563300  |
| H | 5.32024300  | 0.35735900  | 0.92787900  |
| H | 3.02331800  | -1.52613300 | -2.20170800 |
| H | 1.82083200  | 0.59656500  | -2.59192100 |
| H | -3.21315100 | 0.36135000  | 2.83986400  |
| H | -5.57119900 | -0.00318600 | 2.69804000  |
| H | -7.37668200 | -1.14138900 | 1.43629100  |
| H | -4.79860400 | -1.43186500 | -1.99420000 |
| H | -2.97485100 | -0.35648500 | -0.73508400 |
| C | 4.91004900  | -2.05383300 | -0.43453000 |
| O | 4.66012500  | -3.03892100 | -1.10184100 |
| H | -1.63637200 | 3.47363900  | -0.99861400 |
| H | -0.31038300 | 1.47180700  | -1.70014800 |

#### 1-conf4

|   |             |             |             |
|---|-------------|-------------|-------------|
| C | -0.54896700 | 0.36194100  | 0.35045600  |
| C | -1.28481100 | 1.02681500  | -0.81036400 |
| H | -0.91029800 | 2.04028900  | -0.96375600 |
| N | -2.71898800 | 1.07999300  | -0.55369900 |
| H | -0.67714000 | 0.92618500  | 1.27716400  |
| O | 0.84940300  | 0.35357400  | -0.01431500 |
| H | -3.27466500 | 0.34193800  | -0.96674500 |
| C | 1.69795500  | -0.22125200 | 0.85171100  |
| O | 1.34487700  | -0.72398800 | 1.90495600  |
| C | 3.11708000  | -0.17602400 | 0.38314600  |
| C | 4.09864600  | -0.74785800 | 1.20154600  |
| C | 5.43418300  | -0.73149300 | 0.81211800  |
| C | 5.80133700  | -0.13809100 | -0.40881900 |
| C | 4.81108300  | 0.43476800  | -1.22771900 |
| C | 3.47885600  | 0.41706700  | -0.83670500 |
| C | -3.35610500 | 2.08600400  | 0.07133000  |
| N | -4.71497900 | 1.96164900  | 0.24639700  |
| S | -2.59351900 | 3.50249000  | 0.61328000  |
| C | -5.56965800 | 0.85899000  | 0.08775200  |
| C | -6.89904200 | 1.11589000  | -0.30052400 |
| C | -7.80859900 | 0.07823800  | -0.42807500 |
| C | -7.38537700 | -1.22953400 | -0.17219900 |
| C | -6.07722200 | -1.50625800 | 0.22901700  |
| C | -5.17171300 | -0.46229600 | 0.36748000  |
| F | 8.39543500  | -0.10264700 | 1.19365200  |
| C | 8.33359900  | -0.69838300 | -0.01963600 |

|   |             |             |             |
|---|-------------|-------------|-------------|
| F | 9.52788600  | -0.55534000 | -0.60581700 |
| F | 8.12806800  | -2.02068800 | 0.18136500  |
| N | -8.33143900 | -2.32430600 | -0.31540500 |
| O | -7.93334900 | -3.47631300 | -0.10953700 |
| O | -9.49458500 | -2.05695500 | -0.63714500 |
| H | 3.80774700  | -1.20316400 | 2.14087400  |
| H | 6.17278900  | -1.18086600 | 1.46346500  |
| H | 5.10125600  | 0.89056300  | -2.16721300 |
| H | 2.72047100  | 0.85992400  | -1.47029600 |
| H | -5.15714500 | 2.83549200  | 0.50299600  |
| H | -7.21028000 | 2.13376800  | -0.50963700 |
| H | -8.82883300 | 0.27048800  | -0.73376800 |
| H | -5.78049000 | -2.52320500 | 0.45059000  |
| H | -4.17559500 | -0.67723000 | 0.73385700  |
| C | 7.19999200  | -0.07832300 | -0.89580500 |
| O | 7.53335300  | 0.42915200  | -1.94909400 |
| H | -1.13398800 | 0.45321400  | -1.72725700 |
| H | -0.88720100 | -0.66549000 | 0.50621800  |

### 1-conf5

|   |             |             |             |
|---|-------------|-------------|-------------|
| C | 0.28259700  | -3.53398100 | -0.08935400 |
| C | 1.72067800  | -3.92216400 | 0.27167900  |
| H | 1.96911900  | -3.56211800 | 1.27523600  |
| N | 2.67290700  | -3.43959700 | -0.72328000 |
| H | 0.16679000  | -2.45035200 | -0.13691100 |
| O | -0.56023700 | -4.09357600 | 0.94458200  |
| H | 2.95969200  | -4.08915900 | -1.44306900 |
| C | -1.60659200 | -3.44195000 | 1.48861600  |
| O | -2.07116900 | -3.85513500 | 2.53394300  |
| C | -2.19274500 | -2.25493800 | 0.78258500  |
| C | -2.45880900 | -1.10245100 | 1.53209300  |
| C | -3.05949900 | -0.00005200 | 0.93147400  |
| C | -3.42839000 | -0.05248100 | -0.42409600 |
| C | -3.18019200 | -1.22147900 | -1.16536300 |
| C | -2.55723300 | -2.31131100 | -0.57164000 |
| C | 3.14783900  | -2.18359700 | -0.89697200 |
| N | 2.83128700  | -1.30168500 | 0.10513200  |
| S | 4.10543900  | -1.82130600 | -2.24793600 |
| C | 3.01029900  | 0.08848000  | 0.18545200  |
| C | 3.17002800  | 0.63730300  | 1.47189300  |
| C | 3.29479200  | 2.00730100  | 1.64459300  |
| C | 3.25932900  | 2.83498400  | 0.51936700  |
| C | 3.08767900  | 2.31089400  | -0.76451800 |
| C | 2.95847100  | 0.93897900  | -0.93246900 |
| F | -5.15727100 | 2.20013200  | 0.70103200  |
| C | -4.34420300 | 2.40299800  | -0.36144000 |
| F | -4.92435500 | 3.31287600  | -1.15211700 |
| F | -3.18827500 | 2.93350700  | 0.10055600  |
| N | 3.39481400  | 4.27174300  | 0.68950200  |
| O | 3.38177900  | 4.98819700  | -0.31819600 |
| O | 3.51684300  | 4.71994800  | 1.83558100  |
| H | -2.19079000 | -1.06843400 | 2.58199300  |
| H | -3.24032900 | 0.88372100  | 1.52979700  |
| H | -3.47722200 | -1.26104500 | -2.20687600 |
| H | -2.37437500 | -3.20628200 | -1.15601400 |
| H | 2.52844800  | -1.71713100 | 0.97772300  |



|   |             |             |             |
|---|-------------|-------------|-------------|
| H | 3.20421500  | -0.01633900 | 2.33767600  |
| H | 3.42618700  | 2.43191400  | 2.63123100  |
| H | 3.04191100  | 2.97399400  | -1.61869200 |
| H | 2.81246500  | 0.52950000  | -1.92119400 |
| C | -4.08252200 | 1.07224600  | -1.13384900 |
| O | -4.43190700 | 1.03170900  | -2.29747100 |
| H | 1.81277500  | -5.00891600 | 0.30427800  |
| H | -0.00150800 | -3.97215100 | -1.04872000 |

### 1-conf6

|   |             |             |             |
|---|-------------|-------------|-------------|
| C | -0.50430400 | -2.07759600 | 0.42794600  |
| C | -1.18127600 | -2.55848600 | -0.85610700 |
| H | -1.21299600 | -1.75482400 | -1.59931000 |
| N | -2.51358400 | -3.09373600 | -0.59309800 |
| H | -1.06012300 | -1.26882500 | 0.90880700  |
| O | 0.79743900  | -1.59412200 | 0.03438100  |
| H | -2.59392000 | -4.09433900 | -0.47307300 |
| C | 1.59109100  | -1.12828600 | 1.01322400  |
| O | 1.25938400  | -1.09635700 | 2.18554200  |
| C | 2.91573300  | -0.65877100 | 0.50487900  |
| C | 3.83647100  | -0.15761900 | 1.43300700  |
| C | 5.08458600  | 0.28970800  | 1.01143800  |
| C | 5.42372200  | 0.23974000  | -0.35237700 |
| C | 4.49447000  | -0.26370400 | -1.28093100 |
| C | 3.24977000  | -0.71045300 | -0.85763500 |
| C | -3.67103600 | -2.42330900 | -0.38735600 |
| N | -3.60615600 | -1.07112400 | -0.60206300 |
| S | -5.07269000 | -3.27441300 | 0.04738400  |
| C | -4.56726800 | -0.06938600 | -0.38528700 |
| C | -4.53517900 | 1.04258200  | -1.24717300 |
| C | -5.41236300 | 2.10132200  | -1.06666700 |
| C | -6.32905400 | 2.04490900  | -0.01388700 |
| C | -6.36730400 | 0.95635200  | 0.86134600  |
| C | -5.48392800 | -0.09915800 | 0.67954300  |
| F | 7.33742900  | 2.33428700  | 0.77294000  |
| C | 7.79971500  | 1.24745200  | 0.11249200  |
| F | 8.91714900  | 1.60522800  | -0.53064500 |
| F | 8.13470400  | 0.31663100  | 1.03565000  |
| N | -7.25629600 | 3.14743600  | 0.18029600  |
| O | -8.07391100 | 3.07370100  | 1.10479400  |
| O | -7.18935000 | 4.11479700  | -0.58702800 |
| H | 3.56794300  | -0.12218700 | 2.48228100  |
| H | 5.77800900  | 0.67197200  | 1.74948200  |
| H | 4.76255100  | -0.29947100 | -2.33044100 |
| H | 2.53846300  | -1.09822700 | -1.57620700 |
| H | -2.79553800 | -0.74363100 | -1.11305900 |
| H | -3.82598700 | 1.06954300  | -2.06822500 |
| H | -5.39701300 | 2.95372300  | -1.73316200 |
| H | -7.07169400 | 0.94624600  | 1.68301100  |
| H | -5.49856100 | -0.93691700 | 1.36120500  |
| C | 6.73111600  | 0.69524300  | -0.88235800 |
| O | 7.03582500  | 0.66728100  | -2.05889300 |
| H | -0.59568300 | -3.36391300 | -1.30274800 |
| H | -0.38856400 | -2.89753000 | 1.14088000  |

### 1-conf7

|   |             |             |             |
|---|-------------|-------------|-------------|
| C | 0.15906200  | 0.07119100  | 1.39108600  |
| C | 1.64100700  | -0.26122800 | 1.20999300  |
| H | 1.97815900  | 0.11088600  | 0.24399400  |
| N | 1.82746000  | -1.71049400 | 1.27078500  |
| H | -0.43178800 | -0.32254200 | 0.56203200  |
| O | 0.08617400  | 1.51596200  | 1.42980600  |
| H | 1.36181200  | -2.19322600 | 2.03028200  |
| C | -0.97821500 | 2.21101700  | 0.98341500  |
| O | -0.85600300 | 3.40549100  | 0.79110200  |
| C | -2.28590600 | 1.50833500  | 0.76558100  |
| C | -2.95450100 | 1.71042700  | -0.44803200 |
| C | -4.20048800 | 1.12987300  | -0.66573300 |
| C | -4.80371500 | 0.36085000  | 0.34474000  |
| C | -4.13711900 | 0.18077500  | 1.56981700  |
| C | -2.88365200 | 0.74123500  | 1.77756400  |
| C | 2.24553000  | -2.53199900 | 0.28616200  |
| N | 3.02749000  | -1.99977700 | -0.71813600 |
| S | 1.81920900  | -4.17005000 | 0.24601100  |
| C | 4.08486500  | -1.07856300 | -0.62712200 |
| C | 4.58290100  | -0.54136700 | -1.82977800 |
| C | 5.65527400  | 0.33576800  | -1.81588000 |
| C | 6.23199900  | 0.68350500  | -0.59007800 |
| C | 5.75773700  | 0.15488800  | 0.61281400  |
| C | 4.68741000  | -0.72854000 | 0.59485800  |
| F | -7.16169300 | 1.19718400  | -1.39819500 |
| C | -6.90968000 | -0.10794800 | -1.14496600 |
| F | -8.08236800 | -0.75076000 | -1.10783200 |
| F | -6.20143200 | -0.59991900 | -2.18782100 |
| N | 7.35124400  | 1.60841200  | -0.56756100 |
| O | 7.84001900  | 1.91573200  | 0.52613100  |
| O | 7.77061400  | 2.05118500  | -1.64347400 |
| H | -2.49714500 | 2.31744500  | -1.22111900 |
| H | -4.68899500 | 1.28957700  | -1.61841400 |
| H | -4.61248900 | -0.40179800 | 2.35033600  |
| H | -2.38725800 | 0.59973200  | 2.73115500  |
| H | 3.03244300  | -2.57304700 | -1.55313500 |
| H | 4.11857600  | -0.81078500 | -2.77249300 |
| H | 6.03851400  | 0.75602700  | -2.73662800 |
| H | 6.23245200  | 0.42281000  | 1.54781600  |
| H | 4.33866100  | -1.15918200 | 1.52496900  |
| C | -6.13110200 | -0.28137600 | 0.19677300  |
| O | -6.66589100 | -0.94610000 | 1.06277700  |
| H | 2.22855000  | 0.23042700  | 1.99167200  |
| H | -0.22050400 | -0.33026400 | 2.33436900  |

### 1-conf8

|   |             |             |             |
|---|-------------|-------------|-------------|
| C | -1.02403200 | -2.54372700 | -0.36223700 |
| C | -2.20882700 | -1.59773400 | -0.54106200 |
| H | -2.29939200 | -0.95662700 | 0.33476700  |
| N | -3.43443200 | -2.38087800 | -0.69874700 |
| H | -1.10627500 | -3.11946400 | 0.56283100  |
| O | 0.14602500  | -1.70163600 | -0.30434900 |
| H | -3.38171200 | -3.18056700 | -1.31873800 |
| C | 1.32980400  | -2.32232600 | -0.16650400 |

|   |             |             |             |
|---|-------------|-------------|-------------|
| O | 1.44539800  | -3.53312100 | -0.09018200 |
| C | 2.47777800  | -1.36666800 | -0.11893800 |
| C | 3.76649300  | -1.89408500 | 0.02721800  |
| C | 4.86941000  | -1.04744800 | 0.07567300  |
| C | 4.69051300  | 0.34384500  | -0.02291800 |
| C | 3.39348100  | 0.86855700  | -0.16957000 |
| C | 2.29416400  | 0.02161800  | -0.21723900 |
| C | -4.52106400 | -2.38914000 | 0.09835900  |
| N | -4.77016200 | -1.27576700 | 0.87516000  |
| S | -5.55701200 | -3.72614900 | 0.18551600  |
| C | -4.66654300 | 0.08406900  | 0.53949500  |
| C | -4.80179800 | 1.02238400  | 1.58140200  |
| C | -4.75529900 | 2.38064300  | 1.31325300  |
| C | -4.56835100 | 2.80685000  | -0.00581200 |
| C | -4.44324700 | 1.89222600  | -1.05423500 |
| C | -4.49615600 | 0.53208900  | -0.78317600 |
| F | 7.40675400  | 0.08149000  | 1.33657400  |
| C | 7.26881900  | 0.77621700  | 0.18363700  |
| F | 8.15212800  | 1.78096900  | 0.20414400  |
| F | 7.60443100  | -0.04788300 | -0.83586700 |
| N | -4.51123200 | 4.22882400  | -0.29240300 |
| O | -4.33065900 | 4.58778700  | -1.46219700 |
| O | -4.64540100 | 5.02427300  | 0.64519500  |
| H | 3.89616400  | -2.96730300 | 0.10208300  |
| H | 5.85481400  | -1.48073400 | 0.18917400  |
| H | 3.26315800  | 1.94181100  | -0.24496100 |
| H | 1.29786800  | 0.43054700  | -0.33033300 |
| H | -5.38469000 | -1.47697200 | 1.65458300  |
| H | -4.93697400 | 0.67913700  | 2.60170800  |
| H | -4.85286900 | 3.10563600  | 2.11081200  |
| H | -4.32082200 | 2.24484000  | -2.07016000 |
| H | -4.42871600 | -0.17487500 | -1.60027700 |
| C | 5.81206300  | 1.31237700  | 0.01848100  |
| O | 5.67505000  | 2.51711200  | -0.06917600 |
| H | -2.04813700 | -0.96134400 | -1.41725300 |
| H | -0.92580900 | -3.23594500 | -1.20349200 |

### 1-conf9

|   |             |             |             |
|---|-------------|-------------|-------------|
| C | 0.89069400  | 2.42773800  | -0.61480100 |
| C | -0.46042500 | 2.74835600  | -1.23646500 |
| H | -0.95698000 | 3.54351500  | -0.68064100 |
| N | -1.35070600 | 1.59826100  | -1.26724800 |
| H | 1.36597800  | 1.57384900  | -1.10289400 |
| O | 0.67218600  | 2.13913400  | 0.78998900  |
| H | -1.05588500 | 0.82556800  | -1.85365100 |
| C | 1.43400900  | 1.28679300  | 1.49685100  |
| O | 1.03055100  | 0.89671100  | 2.57702700  |
| C | 2.76987300  | 0.85911500  | 0.96180200  |
| C | 3.07778500  | -0.50688200 | 0.95896600  |
| C | 4.32925600  | -0.94197500 | 0.53314300  |
| C | 5.29893700  | -0.00680400 | 0.13079900  |
| C | 4.99163600  | 1.36527700  | 0.15862000  |
| C | 3.73432200  | 1.79651400  | 0.56075500  |
| C | -2.55031800 | 1.49558000  | -0.65153700 |
| N | -3.07820100 | 0.22354200  | -0.75260600 |
| S | -3.28904700 | 2.76470800  | 0.18604000  |

|   |             |             |             |
|---|-------------|-------------|-------------|
| C | -4.36329400 | -0.26077400 | -0.48495400 |
| C | -4.47182100 | -1.62700800 | -0.15626300 |
| C | -5.71038500 | -2.20447200 | 0.07240300  |
| C | -6.85564500 | -1.40874600 | -0.02572200 |
| C | -6.77139300 | -0.05467100 | -0.36247500 |
| C | -5.52950900 | 0.51876400  | -0.59589800 |
| F | 6.95019800  | -2.47344600 | 0.83694700  |
| C | 7.03876400  | -1.89876500 | -0.38488400 |
| F | 8.29224600  | -2.06206600 | -0.82304800 |
| F | 6.21768000  | -2.57770900 | -1.21938200 |
| N | -8.15675800 | -2.00215400 | 0.21844100  |
| O | -9.15775600 | -1.27792900 | 0.15252300  |
| O | -8.21457700 | -3.20980500 | 0.48211400  |
| H | 2.33653600  | -1.22711000 | 1.28630100  |
| H | 4.53589900  | -2.00455100 | 0.52715800  |
| H | 5.74704300  | 2.08288500  | -0.13967200 |
| H | 3.51528400  | 2.85824600  | 0.58239800  |
| H | -2.40927100 | -0.50423700 | -0.97770200 |
| H | -3.57558200 | -2.23361700 | -0.07309900 |
| H | -5.79365500 | -3.25157500 | 0.33270900  |
| H | -7.67306700 | 0.53708600  | -0.45382800 |
| H | -5.46245600 | 1.56146100  | -0.86889200 |
| C | 6.65618900  | -0.38652800 | -0.32651400 |
| O | 7.50765800  | 0.41104500  | -0.66855600 |
| H | -0.28724700 | 3.10057000  | -2.25931300 |
| H | 1.54015100  | 3.30173200  | -0.70402100 |

### 1-conf10

|   |             |             |             |
|---|-------------|-------------|-------------|
| C | 0.02205900  | 3.41379400  | -0.06799900 |
| C | 1.01811500  | 3.34631300  | 1.07744900  |
| H | 1.76328800  | 4.13105500  | 0.93707300  |
| N | 1.70095200  | 2.06284700  | 1.17620300  |
| H | -0.42123800 | 4.41125000  | -0.12813100 |
| O | -1.02158700 | 2.44720800  | 0.20822900  |
| H | 1.24763300  | 1.36294800  | 1.75059300  |
| C | -2.00907800 | 2.34406000  | -0.69286600 |
| O | -2.06779800 | 3.01783100  | -1.70785200 |
| C | -3.02721100 | 1.31538500  | -0.31543100 |
| C | -4.11620800 | 1.12015300  | -1.17337100 |
| C | -5.09044100 | 0.17507000  | -0.86750800 |
| C | -4.98224000 | -0.58853800 | 0.30841500  |
| C | -3.88641900 | -0.38793800 | 1.16766200  |
| C | -2.91579600 | 0.55606800  | 0.86003500  |
| C | 2.84592600  | 1.72991000  | 0.54077000  |
| N | 3.18436100  | 0.40395400  | 0.71904300  |
| S | 3.72380400  | 2.82589700  | -0.40284500 |
| C | 4.35145300  | -0.29877100 | 0.39802800  |
| C | 4.21925200  | -1.68689100 | 0.19059600  |
| C | 5.32742600  | -2.47099900 | -0.08584600 |
| C | 6.58452900  | -1.86339000 | -0.15775200 |
| C | 6.74011200  | -0.49161600 | 0.05889300  |
| C | 5.62824300  | 0.28990200  | 0.34107900  |
| F | -7.95219100 | -0.75562400 | -0.36303900 |
| C | -7.20601500 | -1.87502200 | -0.21721000 |
| F | -7.99558000 | -2.82888900 | 0.28980500  |
| F | -6.81658300 | -2.27366700 | -1.45030800 |

|   |             |             |             |
|---|-------------|-------------|-------------|
| N | 7.75026500  | -2.67450500 | -0.45540500 |
| O | 8.85198400  | -2.11743500 | -0.53644100 |
| O | 7.59672000  | -3.89172300 | -0.61601400 |
| H | -4.19263700 | 1.71234300  | -2.07765500 |
| H | -5.92213000 | 0.04473400  | -1.54795100 |
| H | -3.80945800 | -0.97958900 | 2.07244400  |
| H | -2.07463200 | 0.70709900  | 1.52508800  |
| H | 2.43707600  | -0.19121100 | 1.05897000  |
| H | 3.23789400  | -2.14798700 | 0.23797200  |
| H | 5.22470400  | -3.53505400 | -0.25404100 |
| H | 7.72581100  | -0.04613700 | 0.02015300  |
| H | 5.74739400  | 1.34764000  | 0.52163900  |
| C | -5.97450900 | -1.61542900 | 0.70589600  |
| O | -5.89504000 | -2.28300800 | 1.71889300  |
| H | 0.50735300  | 3.52000100  | 2.02764000  |
| H | 0.48881500  | 3.17074400  | -1.02483600 |

### 1-conf11

|   |             |             |             |
|---|-------------|-------------|-------------|
| C | -0.18558100 | 1.14714700  | 0.88466300  |
| C | 0.91269500  | 1.78896200  | 1.71849200  |
| H | 0.67457300  | 2.84603900  | 1.85334400  |
| N | 2.23149500  | 1.66904400  | 1.10791600  |
| H | -1.15076700 | 1.28524100  | 1.37622200  |
| O | 0.12799400  | -0.26823400 | 0.77806500  |
| H | 2.79911200  | 0.89248400  | 1.42095300  |
| C | -0.80892400 | -1.22036500 | 0.63243100  |
| O | -0.49350400 | -2.38456200 | 0.79645700  |
| C | -2.20987100 | -0.83556100 | 0.25334500  |
| C | -3.26650100 | -1.33282600 | 1.02594900  |
| C | -4.58355000 | -1.05278900 | 0.67414200  |
| C | -4.85730100 | -0.29194500 | -0.47591600 |
| C | -3.79204000 | 0.18404300  | -1.26116700 |
| C | -2.47761500 | -0.07614200 | -0.89622200 |
| C | 2.75532000  | 2.52805600  | 0.21812200  |
| N | 3.98693100  | 2.21701000  | -0.31069000 |
| S | 2.01153900  | 3.98063200  | -0.25271900 |
| C | 4.72593000  | 1.02365800  | -0.28262300 |
| C | 6.13027900  | 1.12598800  | -0.31747800 |
| C | 6.91911800  | -0.01303600 | -0.34285800 |
| C | 6.30026300  | -1.26671200 | -0.32604200 |
| C | 4.90997500  | -1.39233000 | -0.30528100 |
| C | 4.12221800  | -0.24855200 | -0.29147700 |
| F | -7.46213800 | -1.81012600 | -0.00532900 |
| C | -7.44244900 | -0.45901100 | -0.07810500 |
| F | -8.60143100 | -0.06192700 | -0.61570200 |
| F | -7.38831900 | 0.01994800  | 1.18636100  |
| N | 7.12220000  | -2.46580100 | -0.34157400 |
| O | 6.55860400  | -3.56560600 | -0.31216900 |
| O | 8.35074100  | -2.33545000 | -0.38371000 |
| H | -3.05674700 | -1.93413500 | 1.90336400  |
| H | -5.38082800 | -1.43711600 | 1.29733100  |
| H | -4.00863600 | 0.75869600  | -2.15418200 |
| H | -1.66829500 | 0.29196500  | -1.51709500 |
| H | 4.42397400  | 3.00268800  | -0.77614500 |
| H | 6.59731400  | 2.10512100  | -0.31590000 |
| H | 7.99862200  | 0.06118500  | -0.36226200 |

|   |             |             |             |
|---|-------------|-------------|-------------|
| H | 4.45264200  | -2.37311200 | -0.32128300 |
| H | 3.04480100  | -0.35348000 | -0.32953600 |
| C | -6.22961900 | 0.04185200  | -0.92347200 |
| O | -6.48250700 | 0.69072500  | -1.92006600 |
| H | 0.96191400  | 1.31326300  | 2.70010400  |
| H | -0.21439600 | 1.58062400  | -0.11659000 |

### 1-conf12

|   |             |             |             |
|---|-------------|-------------|-------------|
| C | 0.99868900  | -3.00171700 | -1.88979900 |
| C | 1.93795700  | -3.53530900 | -0.82067700 |
| H | 1.39582100  | -4.15589800 | -0.10737800 |
| N | 2.60445900  | -2.47027000 | -0.07988000 |
| H | 1.49962500  | -2.31134100 | -2.57381000 |
| O | -0.07258200 | -2.30322300 | -1.21602500 |
| H | 3.33051200  | -1.97167300 | -0.58023100 |
| C | -0.99460300 | -1.70479100 | -1.98275600 |
| O | -0.97408500 | -1.72352900 | -3.20227700 |
| C | -2.04720400 | -1.01571300 | -1.17405000 |
| C | -3.07071100 | -0.34627900 | -1.85534900 |
| C | -4.07386500 | 0.30795500  | -1.14719500 |
| C | -4.06138200 | 0.29624900  | 0.25908000  |
| C | -3.03030100 | -0.37801100 | 0.93859600  |
| C | -2.02946800 | -1.02943500 | 0.22992700  |
| C | 2.42428100  | -2.17778700 | 1.21898200  |
| N | 3.10518600  | -1.08750700 | 1.71385100  |
| S | 1.46330300  | -3.07785500 | 2.29278100  |
| C | 3.76731000  | -0.03764000 | 1.05896100  |
| C | 4.85151400  | 0.56547900  | 1.72621700  |
| C | 5.51830400  | 1.63955100  | 1.15889500  |
| C | 5.10375500  | 2.11264500  | -0.08986900 |
| C | 4.02225200  | 1.54053500  | -0.76254900 |
| C | 3.34914100  | 0.47176900  | -0.18551900 |
| F | -5.76678300 | 2.73375500  | -0.40090700 |
| C | -6.24934300 | 1.73664000  | 0.37636000  |
| F | -7.08401200 | 2.28212100  | 1.26866800  |
| F | -6.97348200 | 0.91187700  | -0.41514700 |
| N | 5.80724600  | 3.23082100  | -0.69592700 |
| O | 5.44144900  | 3.62196000  | -1.81022300 |
| O | 6.74252400  | 3.74434800  | -0.07159600 |
| H | -3.07409000 | -0.34292100 | -2.93902200 |
| H | -4.85353800 | 0.81808400  | -1.69820700 |
| H | -3.02685000 | -0.38269000 | 2.02240000  |
| H | -1.23743700 | -1.54721300 | 0.75788700  |
| H | 3.13385700  | -1.06969700 | 2.72547800  |
| H | 5.17245300  | 0.17952900  | 2.68793200  |
| H | 6.35680200  | 2.10043200  | 1.66462600  |
| H | 3.70041000  | 1.94210700  | -1.71469300 |
| H | 2.47879600  | 0.06698300  | -0.68634900 |
| C | -5.09259900 | 0.96574600  | 1.08676200  |
| O | -5.10126000 | 0.95820800  | 2.30253100  |
| H | 2.69838900  | -4.15288600 | -1.30858600 |
| H | 0.58194300  | -3.82967300 | -2.46976400 |

### 1-conf13

|   |             |             |             |
|---|-------------|-------------|-------------|
| C | -0.39710300 | 2.00250800  | -1.49226600 |
| C | 0.77964500  | 2.95260500  | -1.31598300 |
| H | 1.57166700  | 2.70346700  | -2.02845200 |
| N | 1.33176200  | 3.00068800  | 0.03785400  |
| H | -1.15106300 | 2.15396000  | -0.71846500 |
| O | 0.12829300  | 0.64577400  | -1.41803700 |
| H | 1.02295200  | 3.75781700  | 0.63247400  |
| C | -0.54746900 | -0.40486400 | -0.89799800 |
| O | 0.08591900  | -1.39517900 | -0.58945000 |
| C | -2.03509100 | -0.32822900 | -0.74794300 |
| C | -2.59927400 | -0.77235500 | 0.45448600  |
| C | -3.98117600 | -0.77755600 | 0.61854100  |
| C | -4.81503600 | -0.36219600 | -0.43415200 |
| C | -4.24303200 | 0.05999000  | -1.64724400 |
| C | -2.86331700 | 0.08661600  | -1.80228400 |
| C | 2.37651000  | 2.30212900  | 0.54113000  |
| N | 2.74090500  | 1.20151900  | -0.19097300 |
| S | 3.08829300  | 2.77635100  | 2.00772000  |
| C | 3.86734700  | 0.37729900  | -0.05501600 |
| C | 3.70226600  | -0.98930400 | -0.34976000 |
| C | 4.78377500  | -1.85591400 | -0.29393800 |
| C | 6.03773000  | -1.35029700 | 0.06000900  |
| C | 6.22326600  | 0.00615600  | 0.34464000  |
| C | 5.13969900  | 0.87069800  | 0.28288800  |
| F | -6.65752000 | -2.10998600 | 1.25266400  |
| C | -6.97655100 | -0.82429600 | 0.97733900  |
| F | -8.30882500 | -0.74335400 | 0.88798500  |
| F | -6.58616500 | -0.06917000 | 2.03011000  |
| N | 7.17385500  | -2.25233100 | 0.12742900  |
| O | 8.27286800  | -1.79319700 | 0.46150400  |
| O | 6.99810500  | -3.44438000 | -0.15267500 |
| H | -1.95595600 | -1.10710900 | 1.26020100  |
| H | -4.39125200 | -1.11074400 | 1.56324800  |
| H | -4.89113600 | 0.36521100  | -2.46043300 |
| H | -2.43893600 | 0.40503700  | -2.74755800 |
| H | 2.00543000  | 0.81223700  | -0.77792600 |
| H | 2.71702200  | -1.36662000 | -0.60598200 |
| H | 4.66163200  | -2.90952900 | -0.50893900 |
| H | 7.20846400  | 0.37677100  | 0.59652600  |
| H | 5.27800300  | 1.92288800  | 0.48744800  |
| C | -6.29501800 | -0.34667400 | -0.34332900 |
| O | -7.02730300 | 0.01699000  | -1.24252200 |
| H | 0.42991300  | 3.95939800  | -1.55789200 |
| H | -0.83855000 | 2.15109800  | -2.48004400 |

#### 1-conf14

|   |             |            |             |
|---|-------------|------------|-------------|
| C | 1.89573500  | 4.10467800 | -0.80964500 |
| C | 3.27575200  | 3.47198600 | -0.90067400 |
| H | 3.32986800  | 2.78384800 | -1.74863700 |
| N | 3.71427500  | 2.82123200 | 0.33200800  |
| H | 1.83386100  | 4.80744100 | 0.02498900  |
| O | 0.92728200  | 3.04966500 | -0.60450000 |
| H | 4.14817000  | 3.41538200 | 1.02621200  |
| C | -0.36418700 | 3.42336000 | -0.57060500 |
| O | -0.72996300 | 4.57496800 | -0.72995900 |
| C | -1.29483300 | 2.28107500 | -0.32107300 |

|   |             |             |             |
|---|-------------|-------------|-------------|
| C | -2.67116600 | 2.52836700  | -0.39307900 |
| C | -3.58164600 | 1.50088100  | -0.16758200 |
| C | -3.11918400 | 0.20835400  | 0.13736100  |
| C | -1.73568100 | -0.03350900 | 0.21425200  |
| C | -0.82933400 | 0.99342800  | -0.01339100 |
| C | 3.65869200  | 1.52107700  | 0.70399100  |
| N | 3.08811600  | 0.67118600  | -0.20564100 |
| S | 4.31419800  | 1.06879100  | 2.20549200  |
| C | 2.87904000  | -0.71689600 | -0.20415700 |
| C | 2.65889600  | -1.30669800 | -1.46660100 |
| C | 2.40287500  | -2.66252500 | -1.58272400 |
| C | 2.36475700  | -3.44351200 | -0.42374600 |
| C | 2.56801900  | -2.87884900 | 0.83664700  |
| C | 2.82071900  | -1.51732600 | 0.95054800  |
| F | -5.96096300 | 0.19929700  | 1.24300600  |
| C | -5.56557900 | -0.71704300 | 0.32926800  |
| F | -6.22658200 | -1.85342000 | 0.57787600  |
| F | -5.94980100 | -0.27435800 | -0.89038700 |
| N | 2.10269500  | -4.86805500 | -0.53398900 |
| O | 2.08721500  | -5.54647000 | 0.49975900  |
| O | 1.90502000  | -5.34483900 | -1.65795200 |
| H | -3.02006100 | 3.52704200  | -0.62778700 |
| H | -4.63999200 | 1.71847200  | -0.23281800 |
| H | -1.38572200 | -1.03068800 | 0.45448500  |
| H | 0.23381400  | 0.80272300  | 0.05340500  |
| H | 2.82315700  | 1.09913900  | -1.08377800 |
| H | 2.69824500  | -0.69442000 | -2.36191200 |
| H | 2.24193100  | -3.11458700 | -2.55264800 |
| H | 2.51774000  | -3.49930600 | 1.72218000  |
| H | 2.97190800  | -1.07557200 | 1.92352000  |
| C | -4.02190000 | -0.94060000 | 0.38844000  |
| O | -3.63729500 | -2.06524200 | 0.64331000  |
| H | 3.99136400  | 4.26977600  | -1.11707600 |
| H | 1.66513700  | 4.63372500  | -1.73773500 |

### 1-conf15

|   |             |             |             |
|---|-------------|-------------|-------------|
| C | 0.18407000  | -0.53759100 | 0.56217100  |
| C | 1.57139700  | -0.32467800 | -0.02413400 |
| H | 2.29359700  | -0.21746500 | 0.78468700  |
| N | 1.61536800  | 0.86776600  | -0.87228800 |
| H | -0.58316000 | -0.54476900 | -0.21538600 |
| O | -0.06109900 | 0.53175200  | 1.50783400  |
| H | 0.81674000  | 1.01698900  | -1.47752800 |
| C | -1.26627600 | 1.09875300  | 1.70378000  |
| O | -1.32317700 | 2.15043000  | 2.31267900  |
| C | -2.50522600 | 0.41751300  | 1.20092400  |
| C | -3.44008000 | 1.18560600  | 0.49588900  |
| C | -4.63524700 | 0.61556200  | 0.06798900  |
| C | -4.91884400 | -0.72872600 | 0.36629200  |
| C | -3.98586400 | -1.48867300 | 1.09402900  |
| C | -2.78374400 | -0.92492700 | 1.50129900  |
| C | 2.38521200  | 1.96215000  | -0.71913300 |
| N | 3.57259600  | 1.83181200  | -0.02703100 |
| S | 1.92490200  | 3.47501300  | -1.32624800 |
| C | 4.53096600  | 0.80784100  | -0.09323200 |
| C | 5.57123500  | 0.83032500  | 0.85640900  |



|   |             |             |             |
|---|-------------|-------------|-------------|
| C | 6.57589300  | -0.12260700 | 0.82012600  |
| C | 6.54003000  | -1.11046900 | -0.16966800 |
| C | 5.52276500  | -1.14361400 | -1.12649300 |
| C | 4.52127900  | -0.18341000 | -1.09170800 |
| F | -7.67497100 | 0.46976000  | -0.13889500 |
| C | -7.24012800 | -0.59959200 | -0.84473400 |
| F | -8.30307100 | -1.35967400 | -1.13147700 |
| F | -6.73193000 | -0.14239900 | -2.01271400 |
| N | 7.58417800  | -2.11798300 | -0.20728800 |
| O | 7.52265500  | -2.99906000 | -1.07329300 |
| O | 8.49381600  | -2.05494200 | 0.62844700  |
| H | -3.22859800 | 2.22689700  | 0.28086200  |
| H | -5.33392500 | 1.22813700  | -0.48726100 |
| H | -4.21512400 | -2.52067200 | 1.33273900  |
| H | -2.07925200 | -1.52289600 | 2.06874600  |
| H | 3.91927900  | 2.71781900  | 0.32017600  |
| H | 5.58183300  | 1.59610600  | 1.62497000  |
| H | 7.37417200  | -0.11296500 | 1.55085700  |
| H | 5.52667500  | -1.90438100 | -1.89634000 |
| H | 3.75088500  | -0.19226900 | -1.85233500 |
| C | -6.17127500 | -1.40691000 | -0.04335900 |
| O | -6.42938500 | -2.56850000 | 0.20558300  |
| H | 1.83798100  | -1.21587500 | -0.60246000 |
| H | 0.16576400  | -1.49195600 | 1.09359200  |

### 1-conf16

|   |             |             |             |
|---|-------------|-------------|-------------|
| C | 0.99846900  | 2.52666700  | -0.58602500 |
| C | 2.20645400  | 1.75814200  | -0.08162700 |
| H | 2.26034200  | 0.79047400  | -0.58101200 |
| N | 2.13698600  | 1.54696800  | 1.36690600  |
| H | 0.85253800  | 3.46837600  | -0.04868300 |
| O | -0.16416400 | 1.68932700  | -0.39867100 |
| H | 1.74899000  | 2.30700800  | 1.91277600  |
| C | -1.34053500 | 2.18502700  | -0.81474600 |
| O | -1.46074000 | 3.28300500  | -1.33099400 |
| C | -2.47681800 | 1.24302000  | -0.57842800 |
| C | -3.75255900 | 1.63074300  | -1.00542700 |
| C | -4.84348600 | 0.78970700  | -0.81017100 |
| C | -4.66539300 | -0.45537400 | -0.18122500 |
| C | -3.38159100 | -0.83945900 | 0.24714000  |
| C | -2.29431000 | 0.00160800  | 0.05108500  |
| C | 2.19097300  | 0.37923100  | 2.03404300  |
| N | 2.81685700  | -0.69034800 | 1.42696200  |
| S | 1.49049600  | 0.18787300  | 3.56580300  |
| C | 4.00800800  | -0.71505500 | 0.68246600  |
| C | 4.31280200  | -1.89824800 | -0.01791100 |
| C | 5.49534500  | -2.00681000 | -0.73134600 |
| C | 6.37883500  | -0.92254300 | -0.75039000 |
| C | 6.09890300  | 0.25601100  | -0.05468600 |
| C | 4.91638300  | 0.35883100  | 0.66480500  |
| F | -7.62719500 | 0.11678300  | 0.23533100  |
| C | -7.21910400 | -1.01765600 | -0.37891700 |
| F | -8.09367300 | -1.98363300 | -0.07509400 |
| F | -7.28271400 | -0.80812000 | -1.71435700 |
| N | 7.61560500  | -1.02650700 | -1.50386600 |
| O | 8.37760100  | -0.05250700 | -1.52395000 |

|   |             |             |             |
|---|-------------|-------------|-------------|
| O | 7.85726100  | -2.08561400 | -2.09509300 |
| H | -3.88168300 | 2.59138500  | -1.48993500 |
| H | -5.81870700 | 1.11293800  | -1.15097300 |
| H | -3.25180700 | -1.79972000 | 0.73254900  |
| H | -1.30840500 | -0.29804200 | 0.38407400  |
| H | 2.54476900  | -1.57997400 | 1.82784400  |
| H | 3.61291300  | -2.72706400 | -0.00344200 |
| H | 5.73221100  | -2.91154900 | -1.27594100 |
| H | 6.80733700  | 1.07416800  | -0.06608700 |
| H | 4.71449100  | 1.26018200  | 1.22980500  |
| C | -5.77363600 | -1.40954700 | 0.06141400  |
| O | -5.63396000 | -2.49561100 | 0.58949300  |
| H | 3.10544700  | 2.32616300  | -0.34432700 |
| H | 1.11929400  | 2.74907300  | -1.64903500 |

### 1-conf17

|   |             |             |             |
|---|-------------|-------------|-------------|
| C | 0.91217800  | 2.67821600  | -0.60800100 |
| C | -0.44681500 | 2.92404100  | -1.24762700 |
| H | -0.98625900 | 3.70599100  | -0.71349500 |
| N | -1.27869100 | 1.73069900  | -1.25858300 |
| H | 1.42800000  | 1.83783600  | -1.07674100 |
| O | 0.69971400  | 2.41190500  | 0.80173800  |
| H | -0.93536400 | 0.95599900  | -1.81507300 |
| C | 1.40494200  | 1.50719800  | 1.50228000  |
| O | 0.98418100  | 1.14683300  | 2.58619600  |
| C | 2.70424100  | 0.98785000  | 0.95833700  |
| C | 2.92187800  | -0.39533000 | 0.96606100  |
| C | 4.13876700  | -0.91518400 | 0.53492000  |
| C | 5.16386300  | -0.04906200 | 0.11570700  |
| C | 4.94696700  | 1.34038700  | 0.13176200  |
| C | 3.72411600  | 1.85653000  | 0.54008000  |
| C | -2.47784400 | 1.58205000  | -0.65198800 |
| N | -2.92911700 | 0.27772700  | -0.70629200 |
| S | -3.30126200 | 2.83670000  | 0.12565000  |
| C | -4.19520900 | -0.26161400 | -0.45347000 |
| C | -4.24523300 | -1.60910600 | -0.04468800 |
| C | -5.46053600 | -2.23831400 | 0.17301700  |
| C | -6.64071000 | -1.51370200 | -0.01756800 |
| C | -6.61376900 | -0.17945900 | -0.43393500 |
| C | -5.39494000 | 0.44558500  | -0.65517200 |
| F | 6.66554000  | -2.59407600 | 0.86062900  |
| C | 6.77940400  | -2.05434800 | -0.37492700 |
| F | 8.01725800  | -2.30350000 | -0.81707500 |
| F | 5.91218400  | -2.70121300 | -1.18803800 |
| N | -7.91784600 | -2.16224600 | 0.21280000  |
| O | -8.95219900 | -1.50062400 | 0.06036100  |
| O | -7.92262200 | -3.35235700 | 0.55169600  |
| H | 2.13756500  | -1.06225100 | 1.30580600  |
| H | 4.27526700  | -1.98906000 | 0.53666200  |
| H | 5.74490100  | 2.00412800  | -0.18020700 |
| H | 3.57375000  | 2.93039400  | 0.55183700  |
| H | -2.21338300 | -0.42076200 | -0.87318600 |
| H | -3.32278600 | -2.16001400 | 0.10921600  |
| H | -5.49966600 | -3.27083700 | 0.49474500  |
| H | -7.54062500 | 0.35555700  | -0.59594200 |
| H | -5.37122700 | 1.47223000  | -0.98997900 |

|   |             |             |             |
|---|-------------|-------------|-------------|
| C | 6.48970800  | -0.52086500 | -0.34833900 |
| O | 7.38407300  | 0.21553600  | -0.71687700 |
| H | -0.28148200 | 3.26223200  | -2.27653900 |
| H | 1.52503300  | 3.57761500  | -0.70622400 |

### 1-conf18

|   |             |             |             |
|---|-------------|-------------|-------------|
| C | 0.25632100  | 4.39567800  | -0.27432700 |
| C | -1.11659600 | 4.32167200  | 0.37377500  |
| H | -1.02906200 | 4.06598500  | 1.42964400  |
| N | -1.98591600 | 3.33792400  | -0.25659700 |
| H | 0.19580800  | 4.57733100  | -1.35099100 |
| O | 0.91647200  | 3.12915500  | -0.04980200 |
| H | -2.28938500 | 3.55734200  | -1.19874800 |
| C | 2.15462500  | 2.98887300  | -0.54323000 |
| O | 2.74181300  | 3.86799600  | -1.15194100 |
| C | 2.73170800  | 1.63770500  | -0.26371200 |
| C | 4.03344500  | 1.37255600  | -0.70538200 |
| C | 4.61373800  | 0.12934600  | -0.47434700 |
| C | 3.88956300  | -0.86725500 | 0.20402800  |
| C | 2.58231300  | -0.59490400 | 0.64715000  |
| C | 2.00592000  | 0.64750400  | 0.41759400  |
| C | -2.43181700 | 2.18823300  | 0.29655200  |
| N | -3.10028900 | 1.39549800  | -0.61581000 |
| S | -2.15818800 | 1.75353300  | 1.90803600  |
| C | -3.90270800 | 0.26365700  | -0.43556800 |
| C | -3.99480100 | -0.62768700 | -1.52349800 |
| C | -4.80532500 | -1.74912400 | -1.45498300 |
| C | -5.53308700 | -1.98623200 | -0.28504000 |
| C | -5.46698800 | -1.10802100 | 0.80038200  |
| C | -4.65717600 | 0.01652200  | 0.72625400  |
| F | 6.00413400  | -2.43849600 | -1.32500800 |
| C | 5.88102200  | -2.56240500 | 0.01682700  |
| F | 6.20676100  | -3.81898600 | 0.34181700  |
| F | 6.78823900  | -1.73886500 | 0.59128900  |
| N | -6.37839500 | -3.16203700 | -0.19952000 |
| O | -7.00287200 | -3.36545900 | 0.84905700  |
| O | -6.44232400 | -3.91542800 | -1.17914400 |
| H | 4.58438100  | 2.14489200  | -1.22914100 |
| H | 5.62193500  | -0.04896300 | -0.82575200 |
| H | 2.03041700  | -1.36712200 | 1.17042300  |
| H | 0.99935500  | 0.85232000  | 0.76225000  |
| H | -2.91496400 | 1.60781700  | -1.58974100 |
| H | -3.41836000 | -0.43855900 | -2.42341700 |
| H | -4.86923300 | -2.43793300 | -2.28720900 |
| H | -6.05611300 | -1.29995600 | 1.68788500  |
| H | -4.61402700 | 0.70273400  | 1.55889900  |
| C | 4.43253100  | -2.21741600 | 0.48518100  |
| O | 3.81877900  | -3.09155400 | 1.06598800  |
| H | -1.58407400 | 5.30866200  | 0.29527400  |
| H | 0.84327500  | 5.19645800  | 0.18345200  |

### 1-conf19

|   |            |             |             |
|---|------------|-------------|-------------|
| C | 0.36081700 | -2.84292600 | -0.97864900 |
| C | 1.78346700 | -2.99222600 | -1.49488500 |

|   |             |             |             |
|---|-------------|-------------|-------------|
| H | 2.21418500  | -3.93514900 | -1.15893900 |
| N | 2.65538500  | -1.91388600 | -1.04740100 |
| H | -0.05488600 | -1.86168000 | -1.21796700 |
| O | 0.39152000  | -3.03266400 | 0.45932500  |
| H | 2.43617900  | -0.99154600 | -1.40474400 |
| C | -0.46014500 | -2.42478600 | 1.30347000  |
| O | -0.21029800 | -2.43164400 | 2.49461300  |
| C | -1.70485400 | -1.77698100 | 0.76935800  |
| C | -1.99304400 | -0.46525900 | 1.16573500  |
| C | -3.16581100 | 0.15275200  | 0.74199800  |
| C | -4.07972300 | -0.55021600 | -0.06237800 |
| C | -3.79673500 | -1.87628400 | -0.43572200 |
| C | -2.61461600 | -2.48351000 | -0.03251300 |
| C | 3.80572200  | -2.06254500 | -0.36768700 |
| N | 4.47936000  | -0.91335000 | -0.01878400 |
| S | 4.50000000  | -3.55589100 | 0.04799600  |
| C | 4.08394500  | 0.43302600  | -0.03135400 |
| C | 5.08822000  | 1.40199900  | -0.22486100 |
| C | 4.77938600  | 2.75239500  | -0.19958300 |
| C | 3.45317700  | 3.14076700  | 0.01372200  |
| C | 2.44393800  | 2.19904900  | 0.22234900  |
| C | 2.75945900  | 0.84669000  | 0.20866400  |
| F | -5.78385400 | 1.65552600  | 1.17704600  |
| C | -5.70435100 | 1.50440600  | -0.16526600 |
| F | -6.88028800 | 1.87024400  | -0.68795600 |
| F | -4.76428400 | 2.36466200  | -0.62082600 |
| N | 3.11983600  | 4.55540500  | 0.02963200  |
| O | 1.93798800  | 4.87965700  | 0.19244200  |
| O | 4.03244800  | 5.37567700  | -0.12033500 |
| H | -1.29725400 | 0.07135400  | 1.80084100  |
| H | -3.35636600 | 1.17282400  | 1.04998500  |
| H | -4.51095400 | -2.41856000 | -1.04439400 |
| H | -2.41424900 | -3.50867200 | -0.32384700 |
| H | 5.43370200  | -1.09245700 | 0.26717400  |
| H | 6.11063300  | 1.08688400  | -0.40375400 |
| H | 5.54725000  | 3.49900900  | -0.35516700 |
| H | 1.42959300  | 2.52377500  | 0.41471900  |
| H | 1.98265700  | 0.12504000  | 0.42640500  |
| C | -5.35312700 | 0.03218600  | -0.54699900 |
| O | -6.15746800 | -0.56595900 | -1.23496600 |
| H | 1.74914800  | -3.00082800 | -2.58986500 |
| H | -0.26373200 | -3.61857200 | -1.42792400 |

### 1-conf20

|   |             |             |            |
|---|-------------|-------------|------------|
| C | -1.06322200 | -2.98499000 | 1.95408500 |
| C | -2.01988000 | -3.52727000 | 0.90564200 |
| H | -1.49538500 | -4.17042900 | 0.19924500 |
| N | -2.67347800 | -2.46584100 | 0.14893700 |
| H | -1.54781100 | -2.27623300 | 2.63104300 |
| O | 0.00975600  | -2.31155200 | 1.25697200 |
| H | -3.33666900 | -1.89937800 | 0.66449100 |
| C | 0.93948600  | -1.70267500 | 2.00662900 |
| O | 0.92485000  | -1.69756500 | 3.22630700 |
| C | 1.99183400  | -1.03374100 | 1.18096300 |
| C | 3.02426000  | -0.36234400 | 1.84681400 |
| C | 4.02751500  | 0.27528400  | 1.12394700 |

|   |             |             |             |
|---|-------------|-------------|-------------|
| C | 4.00609300  | 0.24517500  | -0.28188500 |
| C | 2.96635500  | -0.43101900 | -0.94604200 |
| C | 1.96573900  | -1.06611100 | -0.22246700 |
| C | -2.56778400 | -2.25768200 | -1.17406500 |
| N | -3.22227300 | -1.15938000 | -1.68608500 |
| S | -1.73058100 | -3.26932500 | -2.25199500 |
| C | -3.76612500 | -0.03385500 | -1.04730500 |
| C | -4.87331400 | 0.59130300  | -1.65302100 |
| C | -5.42622000 | 1.73501900  | -1.09887800 |
| C | -4.87292300 | 2.25572000  | 0.07486900  |
| C | -3.76578200 | 1.66162700  | 0.68393100  |
| C | -3.20721900 | 0.52273600  | 0.11907200  |
| F | 5.73286900  | 2.68123900  | 0.33332900  |
| C | 6.20333800  | 1.66835000  | -0.43079200 |
| F | 7.03844700  | 2.19283700  | -1.33511500 |
| F | 6.92406100  | 0.84958300  | 0.37003400  |
| N | -5.45571800 | 3.44774400  | 0.66844200  |
| O | -4.97069300 | 3.87773000  | 1.72114900  |
| O | -6.41221300 | 3.98181000  | 0.09566300  |
| H | 3.03422100  | -0.34472400 | 2.93029700  |
| H | 4.81429200  | 0.78703600  | 1.66324800  |
| H | 2.95599900  | -0.44974400 | -2.02964500 |
| H | 1.16731400  | -1.58516500 | -0.73883000 |
| H | -3.32522400 | -1.19618900 | -2.69231100 |
| H | -5.30269400 | 0.16846400  | -2.55497300 |
| H | -6.28225400 | 2.21368000  | -1.55649800 |
| H | -3.33599900 | 2.09939200  | 1.57556900  |
| H | -2.31736300 | 0.09608200  | 0.56482700  |
| C | 5.03640800  | 0.89742100  | -1.12441400 |
| O | 5.03651100  | 0.87581900  | -2.34000200 |
| H | -2.78370800 | -4.12483700 | 1.41381400  |
| H | -0.65056500 | -3.80698100 | 2.54515600  |

### 1-conf21

|   |             |             |             |
|---|-------------|-------------|-------------|
| C | -0.41868000 | 1.89504000  | -1.52250900 |
| C | 0.74786900  | 2.86572700  | -1.40011900 |
| H | 1.53585900  | 2.59555900  | -2.10926100 |
| N | 1.31317000  | 2.97908700  | -0.05548700 |
| H | -1.16596800 | 2.07059100  | -0.74731300 |
| O | 0.12395000  | 0.54877800  | -1.39404800 |
| H | 0.99909900  | 3.75564100  | 0.51075900  |
| C | -0.54982900 | -0.48853400 | -0.84565700 |
| O | 0.08488700  | -1.46352000 | -0.49514900 |
| C | -2.03961200 | -0.41210900 | -0.71755600 |
| C | -2.61810200 | -0.76622200 | 0.50741900  |
| C | -4.00203800 | -0.75804900 | 0.65451900  |
| C | -4.82256000 | -0.42369000 | -0.43671400 |
| C | -4.23556600 | -0.09655000 | -1.67192000 |
| C | -2.85405100 | -0.07937700 | -1.81102000 |
| C | 2.37062500  | 2.31431000  | 0.46651500  |
| N | 2.74155700  | 1.18880400  | -0.22377100 |
| S | 3.08957300  | 2.85581200  | 1.90571100  |
| C | 3.87801400  | 0.38285900  | -0.06616000 |
| C | 3.72591700  | -0.99503700 | -0.31181700 |
| C | 4.81677700  | -1.84789300 | -0.23353800 |
| C | 6.06763700  | -1.31716800 | 0.09373500  |

|   |             |             |             |
|---|-------------|-------------|-------------|
| C | 6.24024900  | 0.05022100  | 0.33000700  |
| C | 5.14719800  | 0.90087800  | 0.24607200  |
| F | -6.70951300 | -1.97200600 | 1.40961500  |
| C | -6.99892600 | -0.71646200 | 0.99602400  |
| F | -8.32874900 | -0.61661500 | 0.89171000  |
| F | -6.59461500 | 0.13921000  | 1.96297600  |
| N | 7.21395400  | -2.20402900 | 0.18368700  |
| O | 8.31016200  | -1.72203200 | 0.49405600  |
| O | 7.04932600  | -3.40677600 | -0.05434200 |
| H | -1.98513700 | -1.03925500 | 1.34411500  |
| H | -4.42402800 | -1.01908500 | 1.61653300  |
| H | -4.87364900 | 0.14587000  | -2.51370400 |
| H | -2.41667900 | 0.16786800  | -2.77182400 |
| H | 2.00420400  | 0.76689900  | -0.78513900 |
| H | 2.74329000  | -1.39153800 | -0.54825200 |
| H | 4.70437000  | -2.90951400 | -0.41120100 |
| H | 7.22302400  | 0.43963400  | 0.56215100  |
| H | 5.27590300  | 1.96086500  | 0.41306500  |
| C | -6.30327600 | -0.39805000 | -0.36426600 |
| O | -7.02566700 | -0.13777200 | -1.30637400 |
| H | 0.38355000  | 3.85678400  | -1.68196500 |
| H | -0.87300900 | 1.99555900  | -2.51029100 |

### 1-conf22

|   |             |             |             |
|---|-------------|-------------|-------------|
| C | -1.41250100 | -4.20392100 | -0.86647500 |
| C | -2.84449700 | -3.69520300 | -0.83369700 |
| H | -3.00649200 | -2.94703800 | -1.61360400 |
| N | -3.25964900 | -3.14986700 | 0.45761400  |
| H | -1.24161000 | -4.97893800 | -0.11475700 |
| O | -0.53000800 | -3.08942900 | -0.57171100 |
| H | -3.63496600 | -3.79940000 | 1.13626900  |
| C | 0.77495700  | -3.25416900 | -0.87141300 |
| O | 1.20854700  | -4.23160500 | -1.45284800 |
| C | 1.62458100  | -2.11458300 | -0.41371200 |
| C | 2.88144700  | -1.95051600 | -1.00903600 |
| C | 3.71817500  | -0.91527300 | -0.60472800 |
| C | 3.30798900  | -0.03902000 | 0.41584400  |
| C | 2.05096100  | -0.21760400 | 1.02082700  |
| C | 1.21262900  | -1.24499800 | 0.60790000  |
| C | -3.35311100 | -1.85354100 | 0.82421000  |
| N | -2.73475700 | -0.96691200 | -0.02728300 |
| S | -4.13294900 | -1.42949400 | 2.26983500  |
| C | -2.87227100 | 0.42144300  | -0.14255200 |
| C | -1.79291900 | 1.12811000  | -0.70896700 |
| C | -1.86948100 | 2.49731300  | -0.90827000 |
| C | -3.03730400 | 3.17026100  | -0.53829300 |
| C | -4.12498800 | 2.48626000  | 0.01230300  |
| C | -4.04556600 | 1.11476500  | 0.20687700  |
| F | 6.34269900  | 0.22530500  | 0.45233300  |
| C | 5.55276300  | 1.31000600  | 0.27874500  |
| F | 6.16774800  | 2.35744300  | 0.83940700  |
| F | 5.46414000  | 1.54593700  | -1.05078100 |
| N | -3.12486500 | 4.60474600  | -0.73833300 |
| O | -4.15750900 | 5.18786400  | -0.38584500 |
| O | -2.16356200 | 5.18810300  | -1.25448500 |
| H | 3.19493100  | -2.63316500 | -1.79018700 |

|   |             |             |             |
|---|-------------|-------------|-------------|
| H | 4.68008900  | -0.80378700 | -1.08838400 |
| H | 1.74495600  | 0.45467400  | 1.81389600  |
| H | 0.25118300  | -1.38472100 | 1.08711600  |
| H | -1.98165700 | -1.35955100 | -0.58265600 |
| H | -0.88755500 | 0.59908800  | -0.98789100 |
| H | -1.03777000 | 3.04167000  | -1.33611600 |
| H | -5.02731500 | 3.02451100  | 0.27228100  |
| H | -4.88878400 | 0.58222300  | 0.62180600  |
| C | 4.14139700  | 1.08517700  | 0.90623400  |
| O | 3.79637000  | 1.85742500  | 1.77912000  |
| H | -3.50034000 | -4.54008900 | -1.06154900 |
| H | -1.17812900 | -4.60341800 | -1.85481800 |

### 1-conf23

|   |             |             |             |
|---|-------------|-------------|-------------|
| C | 0.18438700  | -0.53709800 | 0.56342800  |
| C | 1.57165100  | -0.32384600 | -0.02289400 |
| H | 2.29382400  | -0.21612500 | 0.78588700  |
| N | 1.61517500  | 0.86838000  | -0.87138300 |
| H | -0.58278700 | -0.54466800 | -0.21418200 |
| O | -0.06122200 | 0.53225700  | 1.50895100  |
| H | 0.81624000  | 1.01746100  | -1.47624700 |
| C | -1.26645900 | 1.09937100  | 1.70422100  |
| O | -1.32359100 | 2.15124700  | 2.31274800  |
| C | -2.50520200 | 0.41793300  | 1.20112300  |
| C | -3.44002600 | 1.18579400  | 0.49578700  |
| C | -4.63503900 | 0.61552200  | 0.06777400  |
| C | -4.91851100 | -0.72875800 | 0.36625100  |
| C | -3.98555700 | -1.48847500 | 1.09425200  |
| C | -2.78358500 | -0.92449800 | 1.50164800  |
| C | 2.38537000  | 1.96265700  | -0.71923000 |
| N | 3.57306200  | 1.83244000  | -0.02764800 |
| S | 1.92507700  | 3.47530100  | -1.32689900 |
| C | 4.53109800  | 0.80809600  | -0.09369300 |
| C | 5.57142100  | 0.83040000  | 0.85586600  |
| C | 6.57573300  | -0.12292300 | 0.81971000  |
| C | 6.53940800  | -1.11097500 | -0.16986000 |
| C | 5.52207200  | -1.14394000 | -1.12662100 |
| C | 4.52096900  | -0.18333200 | -1.09197800 |
| F | -7.67478100 | 0.46929700  | -0.13939300 |
| C | -7.23966000 | -0.60007000 | -0.84506500 |
| F | -8.30245100 | -1.36033300 | -1.13189200 |
| F | -6.73133500 | -0.14290400 | -2.01298500 |
| N | 7.58315900  | -2.11893300 | -0.20731500 |
| O | 7.52120500  | -3.00019200 | -1.07309600 |
| O | 8.49288000  | -2.05604500 | 0.62833300  |
| H | -3.22865000 | 2.22708400  | 0.28064700  |
| H | -5.33371800 | 1.22790600  | -0.48769000 |
| H | -4.21472300 | -2.52046300 | 1.33310000  |
| H | -2.07909500 | -1.52227700 | 2.06930000  |
| H | 3.92023000  | 2.71858700  | 0.31871700  |
| H | 5.58234500  | 1.59630900  | 1.62429400  |
| H | 7.37405000  | -0.11343300 | 1.55040100  |
| H | 5.52565200  | -1.90486900 | -1.89630900 |
| H | 3.75051600  | -0.19202800 | -1.85255000 |
| C | -6.17080300 | -1.40715300 | -0.04346400 |
| O | -6.42880500 | -2.56873900 | 0.20560300  |

|   |            |             |             |
|---|------------|-------------|-------------|
| H | 1.83852100 | -1.21512900 | -0.60096900 |
| H | 0.16636800 | -1.49137700 | 1.09500700  |

### 1-conf24

|   |             |             |             |
|---|-------------|-------------|-------------|
| C | 0.99532900  | 2.53932500  | -0.56941700 |
| C | 2.20448800  | 1.76844400  | -0.07140400 |
| H | 2.26058800  | 0.80620200  | -0.58095900 |
| N | 2.13412800  | 1.54168900  | 1.37471200  |
| H | 0.84780900  | 3.47668900  | -0.02490400 |
| O | -0.16584800 | 1.69863800  | -0.38806800 |
| H | 1.74842800  | 2.29661800  | 1.92935100  |
| C | -1.34254400 | 2.19385100  | -0.80379300 |
| O | -1.46396000 | 3.29364200  | -1.31584500 |
| C | -2.47752700 | 1.24902300  | -0.57242000 |
| C | -3.75354000 | 1.63636200  | -0.99900200 |
| C | -4.84333700 | 0.79305200  | -0.80726500 |
| C | -4.66386500 | -0.45388400 | -0.18241200 |
| C | -3.37978900 | -0.83769200 | 0.24532700  |
| C | -2.29367600 | 0.00562900  | 0.05280900  |
| C | 2.18594500  | 0.36662800  | 2.02878500  |
| N | 2.80861400  | -0.69757200 | 1.40863700  |
| S | 1.48833300  | 0.15917800  | 3.55964300  |
| C | 4.00287000  | -0.71721200 | 0.66908200  |
| C | 4.30793000  | -1.89473400 | -0.04074000 |
| C | 5.49421700  | -2.00075700 | -0.74823100 |
| C | 6.38112900  | -0.91914400 | -0.75232700 |
| C | 6.10045400  | 0.25420300  | -0.04815900 |
| C | 4.91394000  | 0.35449200  | 0.66532200  |
| F | -7.62623300 | 0.11388300  | 0.23287100  |
| C | -7.21693500 | -1.01940200 | -0.38264300 |
| F | -8.08999800 | -1.98675000 | -0.07909400 |
| F | -7.28182100 | -0.80848700 | -1.71780800 |
| N | 7.62233300  | -1.02079700 | -1.49868900 |
| O | 8.38776800  | -0.04931200 | -1.50560600 |
| O | 7.86386900  | -2.07538400 | -2.09799100 |
| H | -3.88382700 | 2.59853400  | -1.48018100 |
| H | -5.81894100 | 1.11569900  | -1.14753000 |
| H | -3.24888500 | -1.79938100 | 0.72762400  |
| H | -1.30753700 | -0.29361100 | 0.38545500  |
| H | 2.53462700  | -1.59086000 | 1.79995900  |
| H | 3.60544300  | -2.72147500 | -0.03704100 |
| H | 5.73154300  | -2.90147900 | -1.29925100 |
| H | 6.81126100  | 1.07041800  | -0.04865200 |
| H | 4.71192600  | 1.25182800  | 1.23668000  |
| C | -5.77081500 | -1.41046400 | 0.05650200  |
| O | -5.62966300 | -2.49815000 | 0.58083100  |
| H | 3.10258400  | 2.34102700  | -0.32711800 |
| H | 1.11564100  | 2.77008700  | -1.63071700 |

### 1-conf25

|   |             |            |            |
|---|-------------|------------|------------|
| C | 0.63545600  | 1.04114100 | 0.95744700 |
| C | -0.48479700 | 1.56530300 | 1.84353500 |
| H | -0.59367400 | 0.89447600 | 2.69752800 |
| N | -1.76443600 | 1.66074300 | 1.15549300 |



|   |             |             |             |
|---|-------------|-------------|-------------|
| H | 1.55656000  | 0.95654400  | 1.53808800  |
| O | 0.80955400  | 1.99648200  | -0.12457100 |
| H | -1.94819500 | 2.53545200  | 0.67907800  |
| C | 1.98109500  | 2.19720400  | -0.75086200 |
| O | 2.10825800  | 3.18116300  | -1.45650100 |
| C | 3.09329500  | 1.20154400  | -0.59074200 |
| C | 4.36782200  | 1.67784500  | -0.25954200 |
| C | 5.44205600  | 0.79801600  | -0.16628500 |
| C | 5.25530800  | -0.56999200 | -0.43175500 |
| C | 3.97751700  | -1.03852800 | -0.78593800 |
| C | 2.90180100  | -0.16313600 | -0.85632000 |
| C | -2.68553700 | 0.67590600  | 1.06781400  |
| N | -3.72489900 | 0.99733800  | 0.21854800  |
| S | -2.53511300 | -0.80088300 | 1.87875200  |
| C | -4.96800700 | 0.38559100  | 0.02144500  |
| C | -5.57866600 | 0.57382100  | -1.23474200 |
| C | -6.83157700 | 0.04492700  | -1.49950500 |
| C | -7.48356200 | -0.68231200 | -0.49924300 |
| C | -6.90223900 | -0.86864000 | 0.75811200  |
| C | -5.64946600 | -0.33260000 | 1.02122400  |
| F | 8.24625400  | -0.18105500 | -0.87437800 |
| C | 7.78531900  | -1.09330800 | 0.01234700  |
| F | 8.64414000  | -2.11906400 | 0.02616800  |
| F | 7.80515200  | -0.52133700 | 1.23853500  |
| N | -8.79271200 | -1.24667700 | -0.76949700 |
| O | -9.34714000 | -1.90423800 | 0.11980900  |
| O | -9.30354600 | -1.04735700 | -1.87868000 |
| H | 4.51605500  | 2.73525500  | -0.07170800 |
| H | 6.41326700  | 1.19087100  | 0.10636800  |
| H | 3.84131600  | -2.09162300 | -1.00286100 |
| H | 1.92509100  | -0.53961300 | -1.13885300 |
| H | -3.53531200 | 1.75058600  | -0.43323800 |
| H | -5.06000300 | 1.13252900  | -2.00711700 |
| H | -7.29750300 | 0.18210500  | -2.46655900 |
| H | -7.43490200 | -1.41635700 | 1.52483700  |
| H | -5.20384500 | -0.46341300 | 1.99610600  |
| C | 6.34738200  | -1.56913300 | -0.36512000 |
| O | 6.20006800  | -2.75519500 | -0.58812700 |
| H | -0.23210600 | 2.56227100  | 2.21153900  |
| H | 0.37272900  | 0.06957000  | 0.53537600  |

### 1-conf26

|   |             |             |             |
|---|-------------|-------------|-------------|
| C | 0.02511000  | 3.41072700  | -0.03290700 |
| C | 1.01747300  | 3.34604900  | 1.11587700  |
| H | 1.75383200  | 4.14065700  | 0.98261500  |
| N | 1.71355100  | 2.06929500  | 1.21285300  |
| H | -0.42117300 | 4.40693300  | -0.09271700 |
| O | -1.01726900 | 2.44082000  | 0.23647900  |
| H | 1.28673300  | 1.37677300  | 1.81557000  |
| C | -1.99507300 | 2.33345800  | -0.67470700 |
| O | -2.04302900 | 3.00307800  | -1.69303900 |
| C | -3.01791500 | 1.30689200  | -0.30460400 |
| C | -4.09295600 | 1.10465800  | -1.17836100 |
| C | -5.07299000 | 0.16340000  | -0.87969200 |
| C | -4.98489700 | -0.58887300 | 0.30511300  |
| C | -3.90282700 | -0.38162100 | 1.18010800  |

|   |             |             |             |
|---|-------------|-------------|-------------|
| C | -2.92600600 | 0.55837000  | 0.87941600  |
| C | 2.84379900  | 1.73841100  | 0.54996700  |
| N | 3.20686500  | 0.42197900  | 0.74946800  |
| S | 3.67177000  | 2.82844200  | -0.44356300 |
| C | 4.36693000  | -0.28377800 | 0.41379700  |
| C | 4.24728100  | -1.68714000 | 0.33449600  |
| C | 5.34726500  | -2.47848700 | 0.04948900  |
| C | 6.58606400  | -1.86456900 | -0.16036200 |
| C | 6.73034400  | -0.47765100 | -0.07221500 |
| C | 5.62662700  | 0.31266400  | 0.21836300  |
| F | -7.94245600 | -0.75376700 | -0.41372400 |
| C | -7.20319000 | -1.87450700 | -0.24451900 |
| F | -8.00464500 | -2.82035600 | 0.25901700  |
| F | -6.79533900 | -2.28688700 | -1.46709200 |
| N | 7.74285600  | -2.68379000 | -0.46780200 |
| O | 8.82716600  | -2.12295300 | -0.66945800 |
| O | 7.60014300  | -3.91206200 | -0.51579400 |
| H | -4.15411800 | 1.68881300  | -2.08899700 |
| H | -5.89377300 | 0.02697000  | -1.57194000 |
| H | -3.84147000 | -0.96476300 | 2.09160300  |
| H | -2.09540200 | 0.71540900  | 1.55629700  |
| H | 2.48386300  | -0.16711000 | 1.14748500  |
| H | 3.28050900  | -2.15500100 | 0.49102000  |
| H | 5.25213100  | -3.55427300 | -0.01910400 |
| H | 7.70251700  | -0.02461100 | -0.21804500 |
| H | 5.73873300  | 1.38333300  | 0.29627900  |
| C | -5.98563200 | -1.61013400 | 0.69595000  |
| O | -5.92410100 | -2.26881200 | 1.71596100  |
| H | 0.50178800  | 3.50894100  | 2.06515800  |
| H | 0.49682700  | 3.17177800  | -0.98809900 |

### 1-conf27

|   |             |             |             |
|---|-------------|-------------|-------------|
| C | -0.18552300 | 1.14722700  | 0.88402700  |
| C | 0.91263900  | 1.78890600  | 1.71803300  |
| H | 0.67447600  | 2.84597600  | 1.85293000  |
| N | 2.23150300  | 1.66904900  | 1.10756900  |
| H | -1.15074800 | 1.28519900  | 1.37554100  |
| O | 0.12810400  | -0.26814800 | 0.77712600  |
| H | 2.79890100  | 0.89221100  | 1.42029600  |
| C | -0.80892400 | -1.22032700 | 0.63200600  |
| O | -0.49345600 | -2.38446600 | 0.79624400  |
| C | -2.20989000 | -0.83556400 | 0.25300100  |
| C | -3.26642100 | -1.33284300 | 1.02573600  |
| C | -4.58352200 | -1.05282900 | 0.67408100  |
| C | -4.85741000 | -0.29202800 | -0.47596600 |
| C | -3.79225000 | 0.18396200  | -1.26135700 |
| C | -2.47778100 | -0.07618000 | -0.89655700 |
| C | 2.75552300  | 2.52825400  | 0.21803300  |
| N | 3.98697000  | 2.21695600  | -0.31106700 |
| S | 2.01216300  | 3.98117200  | -0.25225500 |
| C | 4.72593900  | 1.02359800  | -0.28278800 |
| C | 6.13028900  | 1.12583300  | -0.31701200 |
| C | 6.91908400  | -0.01325200 | -0.34222700 |
| C | 6.30016300  | -1.26688200 | -0.32581800 |
| C | 4.90983300  | -1.39240700 | -0.30559700 |
| C | 4.12214700  | -0.24860000 | -0.29201300 |

|   |             |             |             |
|---|-------------|-------------|-------------|
| F | -7.46229200 | -1.81003700 | -0.00479200 |
| C | -7.44248800 | -0.45892700 | -0.07770300 |
| F | -8.60154500 | -0.06177600 | -0.61510000 |
| F | -7.38799500 | 0.02014600  | 1.18670600  |
| N | 7.12200900  | -2.46601600 | -0.34123800 |
| O | 6.55835900  | -3.56579400 | -0.31159000 |
| O | 8.35055900  | -2.33576000 | -0.38352700 |
| H | -3.05654300 | -1.93415100 | 1.90312100  |
| H | -5.38071900 | -1.43716600 | 1.29736800  |
| H | -4.00897300 | 0.75857100  | -2.15436900 |
| H | -1.66853000 | 0.29192800  | -1.51752000 |
| H | 4.42435000  | 3.00274700  | -0.77601400 |
| H | 6.59742200  | 2.10491800  | -0.31502700 |
| H | 7.99859800  | 0.06094800  | -0.36113700 |
| H | 4.45247700  | -2.37317400 | -0.32184800 |
| H | 3.04473800  | -0.35346800 | -0.33049200 |
| C | -6.22979300 | 0.04170900  | -0.92338200 |
| O | -6.48282800 | 0.69040400  | -1.92005300 |
| H | 0.96174600  | 1.31316200  | 2.69963400  |
| H | -0.21426500 | 1.58083600  | -0.11717600 |

### 1-conf28

|   |             |             |             |
|---|-------------|-------------|-------------|
| C | -2.04576800 | -3.48964300 | 0.48854800  |
| C | -3.12763400 | -2.83952000 | 1.33385900  |
| H | -4.00971600 | -3.48224700 | 1.33002600  |
| N | -3.50307500 | -1.51475000 | 0.85105800  |
| H | -1.82090300 | -4.49254400 | 0.86137000  |
| O | -0.85960400 | -2.66527800 | 0.60012800  |
| H | -3.01385000 | -0.73335700 | 1.26731900  |
| C | 0.19700900  | -3.01121300 | -0.15070400 |
| O | 0.20245500  | -3.97011800 | -0.90396900 |
| C | 1.36177800  | -2.09239800 | 0.03901100  |
| C | 2.51129700  | -2.31758800 | -0.72782000 |
| C | 3.62191500  | -1.49129300 | -0.58709100 |
| C | 3.59338000  | -0.42833000 | 0.33306600  |
| C | 2.43675500  | -0.20773200 | 1.10303300  |
| C | 1.32827800  | -1.03102500 | 0.95720400  |
| C | -4.46905700 | -1.25891600 | -0.04620300 |
| N | -4.62832700 | 0.04897600  | -0.44564700 |
| S | -5.52202600 | -2.43348300 | -0.67493400 |
| C | -3.79205200 | 1.16607800  | -0.29911000 |
| C | -4.40413800 | 2.43373300  | -0.24454200 |
| C | -3.63666600 | 3.58364200  | -0.15149200 |
| C | -2.24394100 | 3.46762100  | -0.10553400 |
| C | -1.61508300 | 2.22287900  | -0.17242100 |
| C | -2.38692000 | 1.07324000  | -0.27723900 |
| F | 6.57823000  | -0.90358400 | -0.11731000 |
| C | 6.02381700  | 0.31509700  | -0.31419600 |
| F | 6.94276800  | 1.23613100  | -0.00204800 |
| F | 5.75049300  | 0.43470500  | -1.63384200 |
| N | -1.43289700 | 4.66866300  | 0.00364600  |
| O | -0.20429400 | 4.54542200  | 0.06550200  |
| O | -2.00551700 | 5.76396800  | 0.02992800  |
| H | 2.52736500  | -3.14078500 | -1.43237900 |
| H | 4.49719800  | -1.68637300 | -1.19340300 |
| H | 2.42119600  | 0.61329300  | 1.81037500  |

|   |             |             |             |
|---|-------------|-------------|-------------|
| H | 0.44019500  | -0.85661900 | 1.55174800  |
| H | -5.50976400 | 0.21077100  | -0.91651600 |
| H | -5.48611000 | 2.50799900  | -0.26684200 |
| H | -4.10391600 | 4.55855000  | -0.10128100 |
| H | -0.53467500 | 2.15876900  | -0.16439800 |
| H | -1.89012300 | 0.11684300  | -0.38317000 |
| C | 4.73395600  | 0.49415200  | 0.54656100  |
| O | 4.73477600  | 1.39921900  | 1.35825800  |
| H | -2.78361400 | -2.72752900 | 2.36452900  |
| H | -2.33827100 | -3.55493700 | -0.56138800 |

### 1-conf29

|   |             |             |             |
|---|-------------|-------------|-------------|
| C | 0.20665600  | 1.88467600  | 0.75567200  |
| C | -0.83087700 | 2.60153000  | 1.61266200  |
| H | -1.13174100 | 1.94178000  | 2.43339900  |
| N | -1.99001800 | 3.07791500  | 0.86234900  |
| H | 1.01514400  | 1.52013800  | 1.39274200  |
| O | 0.71136000  | 2.85304900  | -0.19806200 |
| H | -1.96424300 | 4.03535900  | 0.53929400  |
| C | 1.95831800  | 2.80277300  | -0.70120100 |
| O | 2.39173100  | 3.77463800  | -1.29047000 |
| C | 2.77301600  | 1.55134700  | -0.54476400 |
| C | 4.06800500  | 1.66266700  | -0.02399100 |
| C | 4.88008100  | 0.53702900  | 0.07923000  |
| C | 4.41119800  | -0.71134600 | -0.36553700 |
| C | 3.11839800  | -0.81184600 | -0.90989000 |
| C | 2.30015800  | 0.30727300  | -0.99081000 |
| C | -3.05272900 | 2.37702200  | 0.40594300  |
| N | -3.13313100 | 1.08221300  | 0.85190900  |
| S | -4.19305600 | 3.13270200  | -0.59781600 |
| C | -4.03059800 | 0.05676900  | 0.50966800  |
| C | -4.32781900 | -0.88969900 | 1.50803300  |
| C | -5.16025800 | -1.96497200 | 1.23685900  |
| C | -5.69969500 | -2.09302500 | -0.04551000 |
| C | -5.40505100 | -1.17263600 | -1.05471500 |
| C | -4.56711900 | -0.10028100 | -0.77985600 |
| F | 7.44379800  | -1.04782700 | -0.40665600 |
| C | 6.65567100  | -1.89125200 | 0.29938300  |
| F | 7.23460400  | -3.09720300 | 0.28797600  |
| F | 6.63208500  | -1.45612800 | 1.58063100  |
| N | -6.58028600 | -3.21195300 | -0.33720500 |
| O | -7.06709900 | -3.29841600 | -1.47040800 |
| O | -6.80649000 | -4.03256400 | 0.55973500  |
| H | 4.43708800  | 2.62805300  | 0.30343800  |
| H | 5.87187900  | 0.64809000  | 0.49847600  |
| H | 2.76661000  | -1.77373500 | -1.26445000 |
| H | 1.30874700  | 0.21344800  | -1.42021900 |
| H | -2.54965000 | 0.85082600  | 1.64641000  |
| H | -3.91240700 | -0.77372200 | 2.50379000  |
| H | -5.39851500 | -2.68885100 | 2.00516000  |
| H | -5.81754700 | -1.30548400 | -2.04650800 |
| H | -4.32516000 | 0.60728000  | -1.55926000 |
| C | 5.21611200  | -1.95364500 | -0.30081000 |
| O | 4.82663200  | -3.03830000 | -0.68784000 |
| H | -0.37611000 | 3.47724900  | 2.07915800  |
| H | -0.23541000 | 1.04797400  | 0.21087600  |

### 1-conf30

|   |             |             |             |
|---|-------------|-------------|-------------|
| C | -0.62643500 | -2.00782200 | -1.53619200 |
| C | -1.28982000 | -2.99945900 | -0.59023500 |
| H | -2.19637800 | -3.39120900 | -1.06385400 |
| N | -1.57747000 | -2.45270400 | 0.73470000  |
| H | -0.48463600 | -2.46411300 | -2.51951600 |
| O | 0.66314800  | -1.67701600 | -0.97339400 |
| H | -0.90307700 | -2.63719000 | 1.46453900  |
| C | 1.39361000  | -0.76404400 | -1.63322000 |
| O | 1.02084300  | -0.22096500 | -2.65924400 |
| C | 2.70745900  | -0.49170400 | -0.97442100 |
| C | 3.56122500  | 0.44273200  | -1.57290600 |
| C | 4.79712400  | 0.73019600  | -1.00259200 |
| C | 5.19179300  | 0.08017500  | 0.18032000  |
| C | 4.32971100  | -0.85702300 | 0.77837100  |
| C | 3.09669000  | -1.14237100 | 0.20698800  |
| C | -2.56152100 | -1.60234400 | 1.10360300  |
| N | -3.51569500 | -1.36807500 | 0.14589500  |
| S | -2.57817700 | -0.95970500 | 2.67419200  |
| C | -4.59055200 | -0.46508900 | 0.12894400  |
| C | -5.71501900 | -0.82886300 | -0.63631500 |
| C | -6.79890300 | 0.02782300  | -0.75094100 |
| C | -6.75683600 | 1.26052800  | -0.09428000 |
| C | -5.64375800 | 1.64704500  | 0.65674700  |
| C | -4.55872900 | 0.78788600  | 0.76539900  |
| F | 7.83360900  | 0.97992300  | -1.03970000 |
| C | 7.48513100  | 1.35108300  | 0.21407700  |
| F | 8.60637800  | 1.44642300  | 0.93793600  |
| F | 6.93525400  | 2.58527500  | 0.14003300  |
| N | -7.89105600 | 2.16216400  | -0.20225400 |
| O | -7.84564100 | 3.24113900  | 0.40011300  |
| O | -8.85626300 | 1.81421200  | -0.89277200 |
| H | 3.24991600  | 0.93901900  | -2.48450700 |
| H | 5.43814100  | 1.45644200  | -1.48560600 |
| H | 4.64031600  | -1.35394100 | 1.69005100  |
| H | 2.43712600  | -1.86534900 | 0.67063700  |
| H | -3.53546400 | -2.02458500 | -0.62472200 |
| H | -5.74051800 | -1.79237500 | -1.13528100 |
| H | -7.66836800 | -0.25308500 | -1.33073100 |
| H | -5.62511000 | 2.61626900  | 1.13808500  |
| H | -3.69074600 | 1.08686400  | 1.33414300  |
| C | 6.49116100  | 0.32854500  | 0.84915500  |
| O | 6.84440500  | -0.21847700 | 1.87577100  |
| H | -0.63461100 | -3.85930700 | -0.43851600 |
| H | -1.20929100 | -1.09134700 | -1.65341100 |

### 1-conf31

|   |             |             |             |
|---|-------------|-------------|-------------|
| C | 0.11545900  | -1.05673400 | 0.02625500  |
| C | 1.60910500  | -0.80412500 | 0.15999300  |
| H | 1.93764900  | -0.24181300 | -0.71484300 |
| N | 2.34068100  | -2.07026100 | 0.23098800  |
| H | -0.41644900 | -0.10401600 | -0.00172800 |
| O | -0.28405700 | -1.82925400 | 1.18904700  |

|   |             |             |             |
|---|-------------|-------------|-------------|
| H | 1.89874600  | -2.80289900 | 0.77391100  |
| C | -1.50785600 | -1.75416400 | 1.74786800  |
| O | -1.67338000 | -2.22641600 | 2.85586100  |
| C | -2.63237300 | -1.11597200 | 0.98681700  |
| C | -3.41156100 | -0.15252300 | 1.63919200  |
| C | -4.50520000 | 0.41733400  | 0.99406300  |
| C | -4.84638700 | 0.00636600  | -0.30637200 |
| C | -4.07288200 | -0.97757700 | -0.94745600 |
| C | -2.96855400 | -1.52945000 | -0.31153400 |
| C | 3.33554700  | -2.49684400 | -0.56855300 |
| N | 4.08254500  | -1.55001300 | -1.24045800 |
| S | 3.66504600  | -4.14424100 | -0.79163900 |
| C | 4.57792900  | -0.31981000 | -0.77796800 |
| C | 5.12330900  | 0.56201400  | -1.73120900 |
| C | 5.66942500  | 1.77234400  | -1.33643000 |
| C | 5.66716200  | 2.10772700  | 0.02157700  |
| C | 5.14186000  | 1.24168900  | 0.98351700  |
| C | 4.60177800  | 0.02662200  | 0.58523700  |
| F | -7.45137800 | 1.16843700  | 0.76173800  |
| C | -6.89812300 | 1.63673300  | -0.38070000 |
| F | -7.89286300 | 2.01382800  | -1.19193400 |
| F | -6.17919700 | 2.73972100  | -0.06770900 |
| N | 6.22894700  | 3.37918000  | 0.44077000  |
| O | 6.20250500  | 3.66784800  | 1.64313600  |
| O | 6.71110200  | 4.12272400  | -0.42199500 |
| H | -3.15869800 | 0.15249000  | 2.64837300  |
| H | -5.08182400 | 1.17043500  | 1.51576600  |
| H | -4.34831700 | -1.30079600 | -1.94456500 |
| H | -2.38886200 | -2.29397400 | -0.81677500 |
| H | 4.56720900  | -1.93246100 | -2.04333200 |
| H | 5.10848700  | 0.29374300  | -2.78217800 |
| H | 6.08409200  | 2.45641800  | -2.06534100 |
| H | 5.17144700  | 1.51220600  | 2.03105500  |
| H | 4.22436500  | -0.65818400 | 1.33420000  |
| C | -6.00077600 | 0.55384200  | -1.05750000 |
| O | -6.30356500 | 0.21197300  | -2.18411200 |
| H | 1.80401400  | -0.19945900 | 1.05149600  |
| H | -0.10488100 | -1.63387700 | -0.87404000 |

### 1-conf32

|   |             |             |             |
|---|-------------|-------------|-------------|
| C | -0.87819700 | 0.89822000  | -1.90195800 |
| C | -2.02801200 | 0.59027400  | -0.95961700 |
| H | -2.95819100 | 0.86736400  | -1.45693900 |
| N | -1.89594400 | 1.35177800  | 0.28489700  |
| H | -0.98365000 | 0.32436400  | -2.82562600 |
| O | 0.34014800  | 0.50216900  | -1.22697400 |
| H | -0.95217900 | 1.45966000  | 0.63725400  |
| C | 1.49209500  | 0.69263700  | -1.89422500 |
| O | 1.54237200  | 1.16035200  | -3.01815500 |
| C | 2.69053900  | 0.26763300  | -1.10944800 |
| C | 3.95031600  | 0.42069900  | -1.70103400 |
| C | 5.09898500  | 0.04170300  | -1.01373200 |
| C | 4.99567200  | -0.49769200 | 0.28079800  |
| C | 3.72755100  | -0.64977800 | 0.87044800  |
| C | 2.58246500  | -0.27096400 | 0.18239900  |
| C | -2.79142100 | 2.18659600  | 0.84276900  |

|   |             |             |             |
|---|-------------|-------------|-------------|
| N | -4.12339100 | 2.02499500  | 0.51775600  |
| S | -2.32478700 | 3.43463800  | 1.89096300  |
| C | -4.86533400 | 0.84015500  | 0.38163700  |
| C | -6.15344000 | 0.93904200  | -0.17912800 |
| C | -6.95469100 | -0.18462800 | -0.29980200 |
| C | -6.46430400 | -1.41874100 | 0.13969100  |
| C | -5.19432500 | -1.53538000 | 0.70964700  |
| C | -4.39677000 | -0.40633400 | 0.83490200  |
| F | 7.70984800  | -1.49947000 | -0.67782700 |
| C | 7.59626100  | -0.78147700 | 0.46347600  |
| F | 8.53413300  | -1.21490600 | 1.31356900  |
| F | 7.87273400  | 0.50947500  | 0.16669600  |
| N | -7.29512100 | -2.60208600 | 0.00724200  |
| O | -6.84071300 | -3.68729900 | 0.38875200  |
| O | -8.42413700 | -2.47693100 | -0.48194500 |
| H | 4.02171400  | 0.83745100  | -2.69874300 |
| H | 6.06044400  | 0.17135900  | -1.49378300 |
| H | 3.65532400  | -1.06646100 | 1.86828600  |
| H | 1.60909000  | -0.39163500 | 0.64131800  |
| H | -4.67318500 | 2.85635600  | 0.69762800  |
| H | -6.51695500 | 1.90061900  | -0.52559000 |
| H | -7.94276700 | -0.11562000 | -0.73590900 |
| H | -4.84451200 | -2.49661000 | 1.06330700  |
| H | -3.42544900 | -0.49105700 | 1.30571500  |
| C | 6.16929700  | -0.92463700 | 1.07990100  |
| O | 6.09722100  | -1.38721700 | 2.20176500  |
| H | -2.06003400 | -0.48367900 | -0.74904300 |
| H | -0.82154400 | 1.96242900  | -2.14235700 |

**Annex II:** XYZ cartesian coordinates of the optimized energies of 28 starting rotamers of chemosensor **2** (**2-conf1** to **2-conf28**).

### **2-conf1**

|   |             |             |             |
|---|-------------|-------------|-------------|
| C | -1.57220300 | 5.05566500  | 1.51664000  |
| C | -1.51293500 | 3.52813800  | 1.66910400  |
| C | -1.46874400 | 2.80235300  | 0.32585900  |
| C | -0.35667000 | 3.33896900  | -0.61084800 |
| C | -0.39172100 | 4.87178100  | -0.71905000 |
| C | -0.41785900 | 5.57492200  | 0.64800900  |
| H | -0.49911800 | 2.89111900  | -1.59681300 |
| N | 0.95208800  | 2.89868600  | -0.12246700 |
| H | -1.32833900 | 1.72927000  | 0.45812300  |
| O | -2.73228900 | 3.04118100  | -0.37129500 |
| H | 1.48412200  | 3.57866200  | 0.40788900  |
| C | -3.51132700 | 2.07573200  | -0.88525500 |
| O | -4.33376100 | 2.37286400  | -1.73372200 |
| C | -3.40408500 | 0.66528000  | -0.37877200 |
| C | -3.32729200 | -0.37135600 | -1.31685200 |
| C | -3.30156400 | -1.69770900 | -0.89674400 |
| C | -3.38032200 | -2.00242000 | 0.47368500  |
| C | -3.48049600 | -0.95798300 | 1.41016200  |
| C | -3.48320500 | 0.36559800  | 0.99013700  |
| C | 1.53454200  | 1.70643000  | -0.38256800 |
| N | 2.72322400  | 1.54000900  | 0.30052300  |
| S | 0.83810100  | 0.54105100  | -1.38934500 |
| C | 3.73052000  | 0.57804300  | 0.17016700  |

|   |             |             |             |
|---|-------------|-------------|-------------|
| C | 4.53176800  | 0.34044500  | 1.30557400  |
| C | 5.58356200  | -0.55956000 | 1.25498600  |
| C | 5.84014900  | -1.23299200 | 0.05682200  |
| C | 5.06724400  | -1.00185100 | -1.08444200 |
| C | 4.01706800  | -0.09602400 | -1.03141700 |
| F | -4.26534600 | -4.58930400 | -0.87928900 |
| C | -3.24001800 | -4.57695100 | 0.00386000  |
| F | -3.24296000 | -5.74965000 | 0.64833700  |
| F | -2.08880900 | -4.49689100 | -0.70253500 |
| N | 6.93408600  | -2.18396300 | -0.00391400 |
| O | 7.13468100  | -2.78630800 | -1.06590400 |
| O | 7.62413700  | -2.35492500 | 1.00895000  |
| H | -1.54212300 | 5.52096700  | 2.50746900  |
| H | -2.52832500 | 5.34113500  | 1.06118200  |
| H | -0.60930700 | 3.24477100  | 2.22367200  |
| H | -2.36328900 | 3.16086400  | 2.25254800  |
| H | -1.29743600 | 5.13655200  | -1.27462200 |
| H | 0.45955300  | 5.20624800  | -1.32186800 |
| H | -0.51169000 | 6.65534300  | 0.49552900  |
| H | 0.53385500  | 5.42855100  | 1.17939000  |
| H | -3.28206100 | -0.13788100 | -2.37454400 |
| H | -3.22633700 | -2.47810800 | -1.64335500 |
| H | -3.55288800 | -1.19785800 | 2.46460400  |
| H | -3.56614800 | 1.15926900  | 1.72426800  |
| H | 2.85583400  | 2.15823000  | 1.09308600  |
| H | 4.31868900  | 0.86177100  | 2.23351100  |
| H | 6.19331900  | -0.74841100 | 2.12883300  |
| H | 5.29756700  | -1.51824800 | -2.00741500 |
| H | 3.42625800  | 0.09294500  | -1.91518600 |
| C | -3.36973200 | -3.38559000 | 1.00362300  |
| O | -3.45321300 | -3.66381500 | 2.18441000  |

## 2-conf2

|   |             |             |             |
|---|-------------|-------------|-------------|
| C | 1.54249100  | 3.66884000  | 1.59242400  |
| C | 0.68102200  | 2.39717700  | 1.60535400  |
| C | -0.02124100 | 2.14409300  | 0.27308400  |
| C | 0.94636800  | 2.18270000  | -0.93652000 |
| C | 1.83789000  | 3.43382400  | -0.91437100 |
| C | 2.54722900  | 3.65071000  | 0.43208000  |
| H | 0.34547400  | 2.16772300  | -1.84889200 |
| N | 1.77587600  | 0.97053500  | -0.94671800 |
| H | -0.54588200 | 1.18806600  | 0.27513100  |
| O | -0.98220100 | 3.22269600  | 0.04561500  |
| H | 2.73936400  | 1.08438800  | -0.65570300 |
| C | -2.28055600 | 3.04036000  | -0.24571900 |
| O | -2.90090000 | 3.95366600  | -0.76100600 |
| C | -2.96456700 | 1.75187700  | 0.11242100  |
| C | -3.77134200 | 1.13959900  | -0.85440800 |
| C | -4.48401600 | -0.01464200 | -0.54468200 |
| C | -4.41722300 | -0.55580000 | 0.75134600  |
| C | -3.62400500 | 0.07662700  | 1.72526000  |
| C | -2.89605900 | 1.21582000  | 1.40768100  |
| C | 1.43519700  | -0.19039500 | -1.53577300 |
| N | 2.36424900  | -1.20577800 | -1.53104200 |
| S | -0.05138200 | -0.46198500 | -2.30985600 |
| C | 3.59398900  | -1.33054800 | -0.86475100 |
| C | 4.61975300  | -2.04672600 | -1.51176500 |



|   |             |             |             |
|---|-------------|-------------|-------------|
| C | 5.84131100  | -2.24446000 | -0.88770000 |
| C | 6.04318700  | -1.71603100 | 0.39099800  |
| C | 5.03567100  | -1.01755400 | 1.05825100  |
| C | 3.80854500  | -0.83319900 | 0.43412200  |
| F | -7.01649000 | -1.71361200 | -0.35586400 |
| C | -6.03265500 | -2.51735800 | 0.11033200  |
| F | -6.60883400 | -3.60127200 | 0.64278800  |
| F | -5.29440600 | -2.92087100 | -0.94948900 |
| N | 7.32753500  | -1.90899700 | 1.04552900  |
| O | 7.49585900  | -1.41668800 | 2.16667700  |
| O | 8.19695900  | -2.55705400 | 0.45255200  |
| H | 2.06735200  | 3.76105700  | 2.54901500  |
| H | 0.89426100  | 4.54887800  | 1.50062300  |
| H | 1.31079500  | 1.52359900  | 1.81428600  |
| H | -0.06395500 | 2.43928800  | 2.40628200  |
| H | 1.19224100  | 4.29354800  | -1.12179300 |
| H | 2.55812300  | 3.37385400  | -1.73772400 |
| H | 3.10581300  | 4.59203700  | 0.39685500  |
| H | 3.29490400  | 2.86400100  | 0.60826200  |
| H | -3.83582000 | 1.56518400  | -1.84936500 |
| H | -5.08764500 | -0.47577200 | -1.31589200 |
| H | -3.58501700 | -0.33660900 | 2.72644500  |
| H | -2.29420200 | 1.69531100  | 2.17145000  |
| H | 2.12668000  | -1.95202800 | -2.17277500 |
| H | 4.45473400  | -2.43765700 | -2.51001100 |
| H | 6.63531600  | -2.78701800 | -1.38414100 |
| H | 5.20418400  | -0.64452100 | 2.06014200  |
| H | 3.01073600  | -0.34409800 | 0.97831400  |
| C | -5.15131100 | -1.77473800 | 1.16291800  |
| O | -5.11464900 | -2.24725200 | 2.28271200  |

## 2-conf3

|   |             |             |             |
|---|-------------|-------------|-------------|
| C | 5.71369500  | -0.96403100 | -1.05155200 |
| C | 4.22002200  | -0.91295600 | -1.40551500 |
| C | 3.33216400  | -0.66686200 | -0.18682000 |
| C | 3.77807900  | 0.57011300  | 0.63858200  |
| C | 5.28535500  | 0.53646800  | 0.94586500  |
| C | 6.15083800  | 0.30199700  | -0.30222100 |
| H | 3.24362300  | 0.56061200  | 1.59541500  |
| N | 3.44731000  | 1.80214200  | -0.08922400 |
| H | 2.29078300  | -0.54672000 | -0.48787700 |
| O | 3.44585800  | -1.81519900 | 0.70726400  |
| H | 4.19678200  | 2.26789300  | -0.58405200 |
| C | 2.40102500  | -2.48374400 | 1.22686800  |
| O | 2.58348300  | -3.19155400 | 2.20043800  |
| C | 1.04802300  | -2.38936500 | 0.58143400  |
| C | -0.05755800 | -2.11279100 | 1.39459400  |
| C | -1.33823200 | -2.08534300 | 0.85015400  |
| C | -1.52811200 | -2.36091600 | -0.51513500 |
| C | -0.41628100 | -2.66308200 | -1.32176300 |
| C | 0.86304300  | -2.66956900 | -0.78151600 |
| C | 2.24279500  | 2.39231000  | -0.26161600 |
| N | 1.21714200  | 1.85605600  | 0.47522000  |
| S | 2.09400600  | 3.73420700  | -1.28928500 |
| C | -0.16185500 | 2.12101300  | 0.41888100  |
| C | -0.88254500 | 2.04768700  | 1.62420300  |
| C | -2.25759600 | 2.23079400  | 1.63561800  |

|   |             |             |             |
|---|-------------|-------------|-------------|
| C | -2.91262200 | 2.49031400  | 0.42962100  |
| C | -2.21547200 | 2.55797300  | -0.77982400 |
| C | -0.84035400 | 2.36910500  | -0.78634100 |
| F | -4.27678400 | -2.92306500 | 0.68887900  |
| C | -4.12042600 | -2.02573100 | -0.31182600 |
| F | -5.22962500 | -2.04971100 | -1.05920400 |
| F | -4.02628500 | -0.79738100 | 0.24872000  |
| N | -4.35389600 | 2.68214500  | 0.43114400  |
| O | -4.91635700 | 2.92763900  | -0.64205500 |
| O | -4.95885800 | 2.58986200  | 1.50555300  |
| H | 6.29950200  | -1.08458800 | -1.96860000 |
| H | 5.91314000  | -1.84466100 | -0.42902600 |
| H | 4.03292400  | -0.09861200 | -2.11640500 |
| H | 3.90250100  | -1.83726300 | -1.89847000 |
| H | 5.45231000  | -0.27892700 | 1.65701400  |
| H | 5.56313600  | 1.46513200  | 1.45515500  |
| H | 7.19972300  | 0.22253700  | 0.00185900  |
| H | 6.09839600  | 1.16530900  | -0.98026000 |
| H | 0.08538800  | -1.91656000 | 2.45126300  |
| H | -2.17376800 | -1.85426200 | 1.49851200  |
| H | -0.56878200 | -2.88831200 | -2.37089800 |
| H | 1.71063300  | -2.90994500 | -1.41387900 |
| H | 1.48906900  | 1.28981500  | 1.26992500  |
| H | -0.35946300 | 1.85577900  | 2.55531600  |
| H | -2.81582700 | 2.18284500  | 2.56147900  |
| H | -2.74928500 | 2.73939400  | -1.70370600 |
| H | -0.29637400 | 2.40318000  | -1.71940300 |
| C | -2.85791100 | -2.35511700 | -1.16875500 |
| O | -3.03845000 | -2.59331600 | -2.34719700 |

## 2-conf4

|   |             |             |             |
|---|-------------|-------------|-------------|
| C | -2.19721600 | -4.61037500 | -0.97502100 |
| C | -0.96150500 | -3.94988800 | -0.34496000 |
| C | -0.95417700 | -2.43176100 | -0.51220100 |
| C | -2.27677000 | -1.76564000 | -0.04754900 |
| C | -3.50863300 | -2.46473400 | -0.64538100 |
| C | -3.49615900 | -3.98876000 | -0.44312400 |
| H | -2.26230400 | -0.72719400 | -0.37693200 |
| N | -2.34848200 | -1.79192000 | 1.42561200  |
| H | -0.11781700 | -1.98344000 | 0.02668200  |
| O | -0.83047000 | -2.12382000 | -1.93451500 |
| H | -2.67368800 | -2.66031300 | 1.83293800  |
| C | 0.07676200  | -1.27713500 | -2.45288400 |
| O | -0.11920000 | -0.81265900 | -3.56107500 |
| C | 1.33291700  | -0.96072100 | -1.69261900 |
| C | 1.70989600  | 0.38111400  | -1.55964300 |
| C | 2.90501100  | 0.71367300  | -0.92858700 |
| C | 3.75191900  | -0.29993800 | -0.44708700 |
| C | 3.37862100  | -1.64672500 | -0.60376400 |
| C | 2.17507500  | -1.97614400 | -1.21319700 |
| C | -1.62632500 | -1.05237400 | 2.29690300  |
| N | -1.20963800 | 0.20526600  | 1.90455100  |
| S | -1.20466700 | -1.63364600 | 3.82780700  |
| C | -1.91034600 | 1.20655700  | 1.21311900  |
| C | -1.18363400 | 2.34747700  | 0.81991000  |
| C | -1.81726000 | 3.39553500  | 0.17270600  |
| C | -3.18822000 | 3.30272700  | -0.08862100 |

|   |             |             |             |
|---|-------------|-------------|-------------|
| C | -3.92847600 | 2.18440800  | 0.30207500  |
| C | -3.29185500 | 1.13866900  | 0.95611200  |
| F | 5.62196500  | 2.08809200  | -0.76132700 |
| C | 5.49640100  | 1.45058100  | 0.42560900  |
| F | 6.67787900  | 1.51337500  | 1.04978900  |
| F | 4.59902600  | 2.13870400  | 1.16918400  |
| N | -3.85659500 | 4.39315300  | -0.77587100 |
| O | -5.06544600 | 4.28646800  | -1.01461400 |
| O | -3.18969100 | 5.38470900  | -1.09474200 |
| H | -2.17753300 | -5.68553600 | -0.76927200 |
| H | -2.15702500 | -4.49489700 | -2.06491300 |
| H | -0.93039900 | -4.16406300 | 0.73099500  |
| H | -0.03995900 | -4.36209700 | -0.76791800 |
| H | -3.51706300 | -2.24628700 | -1.71836300 |
| H | -4.41343800 | -2.01722300 | -0.22119400 |
| H | -4.36219300 | -4.42337400 | -0.95306100 |
| H | -3.61807700 | -4.24187700 | 0.61976300  |
| H | 1.06635100  | 1.16323000  | -1.94644100 |
| H | 3.16567200  | 1.75941500  | -0.82681200 |
| H | 4.04009300  | -2.42501400 | -0.24133800 |
| H | 1.90252300  | -3.01907500 | -1.33140700 |
| H | -0.44070900 | 0.54651300  | 2.46884200  |
| H | -0.11914100 | 2.40306100  | 1.02198600  |
| H | -1.26226900 | 4.27180900  | -0.13621600 |
| H | -4.99197600 | 2.14198800  | 0.10578600  |
| H | -3.87077700 | 0.28275700  | 1.27979100  |
| C | 5.04433400  | -0.02993200 | 0.22526000  |
| O | 5.79048300  | -0.89554400 | 0.64006800  |

## 2-conf5

|   |             |             |             |
|---|-------------|-------------|-------------|
| C | 1.71121100  | 4.63971100  | -1.96380200 |
| C | 1.65454000  | 3.11032600  | -1.82895300 |
| C | 1.45100600  | 2.65190100  | -0.38624000 |
| C | 0.24485000  | 3.34276400  | 0.29891700  |
| C | 0.27957700  | 4.86865100  | 0.11616700  |
| C | 0.47163300  | 5.30226400  | -1.34634600 |
| H | 0.27084100  | 3.09327700  | 1.36200400  |
| N | -1.00333400 | 2.79448500  | -0.23634800 |
| H | 1.31667200  | 1.57134000  | -0.32798500 |
| O | 2.62881700  | 3.03410000  | 0.39245600  |
| H | -1.46262300 | 3.33883500  | -0.95689500 |
| C | 3.33852500  | 2.19239000  | 1.16120700  |
| O | 4.05615000  | 2.65331200  | 2.03136100  |
| C | 3.28914400  | 0.71213700  | 0.90991400  |
| C | 3.10512200  | -0.14438900 | 2.00633900  |
| C | 3.13048700  | -1.51976200 | 1.82440600  |
| C | 3.36633400  | -2.06371300 | 0.54815200  |
| C | 3.57372300  | -1.20302500 | -0.54296300 |
| C | 3.52654500  | 0.17699500  | -0.36207600 |
| C | -1.63003300 | 1.68142100  | 0.20692200  |
| N | -2.73990400 | 1.36093400  | -0.54930000 |
| S | -1.06672400 | 0.76429600  | 1.51085500  |
| C | -3.77039400 | 0.44342600  | -0.31357500 |
| C | -4.42466800 | -0.08645900 | -1.44352900 |
| C | -5.49097100 | -0.95976200 | -1.29951600 |
| C | -5.90798500 | -1.31068100 | -0.01217800 |
| C | -5.28093500 | -0.78707700 | 1.12190200  |

|   |             |             |             |
|---|-------------|-------------|-------------|
| C | -4.21721900 | 0.09175400  | 0.97340100  |
| F | 2.69645200  | -3.80293300 | -1.85946000 |
| C | 3.63922800  | -4.18460800 | -0.96679600 |
| F | 3.61507600  | -5.52031900 | -0.89350900 |
| F | 4.84474000  | -3.81987200 | -1.46215300 |
| N | -7.01880400 | -2.23047700 | 0.14969600  |
| O | -7.35968900 | -2.54841500 | 1.29565800  |
| O | -7.58180500 | -2.65977100 | -0.86497100 |
| H | 1.79885800  | 4.90779300  | -3.02192600 |
| H | 2.61262100  | 5.01700800  | -1.46570000 |
| H | 0.81756100  | 2.71520300  | -2.41864500 |
| H | 2.56248300  | 2.65023700  | -2.23202500 |
| H | 1.11636700  | 5.24612300  | 0.71326500  |
| H | -0.63332800 | 5.29959000  | 0.54143800  |
| H | 0.56230300  | 6.39288400  | -1.38888600 |
| H | -0.41538700 | 5.05228500  | -1.94616300 |
| H | 2.93861300  | 0.27284000  | 2.99315400  |
| H | 2.97436300  | -2.18781200 | 2.66350600  |
| H | 3.77083300  | -1.58994300 | -1.53443200 |
| H | 3.69436200  | 0.82935400  | -1.21145900 |
| H | -2.77942400 | 1.79056000  | -1.46689600 |
| H | -4.08561200 | 0.18346600  | -2.43857600 |
| H | -5.98866600 | -1.37382500 | -2.16669600 |
| H | -5.63547100 | -1.05566900 | 2.10867900  |
| H | -3.74100000 | 0.51026500  | 1.84758800  |
| C | 3.38481100  | -3.54011700 | 0.43213200  |
| O | 3.21076500  | -4.29971600 | 1.36547200  |

## 2-conf6

|   |             |             |             |
|---|-------------|-------------|-------------|
| C | -1.17490800 | 3.14640000  | -2.38381300 |
| C | -0.36022700 | 1.92362400  | -1.93610200 |
| C | 0.17830100  | 2.06063000  | -0.51341500 |
| C | -0.91629700 | 2.44378800  | 0.51437700  |
| C | -1.75928400 | 3.63518500  | 0.03357100  |
| C | -2.30519800 | 3.45817400  | -1.39265200 |
| H | -0.41985500 | 2.69301100  | 1.45518300  |
| N | -1.78040000 | 1.28508900  | 0.77519900  |
| H | 0.66768000  | 1.14404000  | -0.18210600 |
| O | 1.14236500  | 3.16022100  | -0.48900500 |
| H | -2.70462700 | 1.31390300  | 0.36175900  |
| C | 2.39684700  | 3.06715500  | -0.01862900 |
| O | 2.98397900  | 4.08784800  | 0.29442300  |
| C | 3.08142100  | 1.73269200  | 0.06225900  |
| C | 3.77223200  | 1.40969500  | 1.24038800  |
| C | 4.48644700  | 0.22294700  | 1.32273900  |
| C | 4.54488700  | -0.64984400 | 0.22033600  |
| C | 3.86882400  | -0.31344200 | -0.96455500 |
| C | 3.13525800  | 0.86814600  | -1.03778200 |
| C | -1.54300300 | 0.34203300  | 1.70541600  |
| N | -2.49497600 | -0.63691900 | 1.87934200  |
| S | -0.16378700 | 0.30774700  | 2.69451800  |
| C | -3.63568400 | -0.96568000 | 1.13081600  |
| C | -4.73595600 | -1.50770000 | 1.82393500  |
| C | -5.87561600 | -1.89920700 | 1.13994200  |
| C | -5.92097900 | -1.74206300 | -0.24878500 |
| C | -4.83724800 | -1.22217100 | -0.95839800 |
| C | -3.69181000 | -0.84310100 | -0.27035200 |

|   |             |             |             |
|---|-------------|-------------|-------------|
| F | 4.21513200  | -3.33746000 | -1.18417200 |
| C | 5.43730300  | -2.88333700 | -0.82117100 |
| F | 6.19068500  | -3.94381800 | -0.50818700 |
| F | 5.99206800  | -2.28788200 | -1.90237200 |
| N | -7.11814800 | -2.14058800 | -0.97114500 |
| O | -7.15080600 | -1.96929200 | -2.19490500 |
| O | -8.05322300 | -2.63423200 | -0.33103600 |
| H | -1.58399500 | 2.96388400  | -3.38299100 |
| H | -0.51253100 | 4.01663800  | -2.46618300 |
| H | -0.98925200 | 1.02519100  | -1.96548300 |
| H | 0.47216200  | 1.73911100  | -2.62249200 |
| H | -1.11366400 | 4.51907400  | 0.06218600  |
| H | -2.56865400 | 3.81217800  | 0.75027500  |
| H | -2.83316600 | 4.36994300  | -1.69141100 |
| H | -3.05305900 | 2.65312500  | -1.42572900 |
| H | 3.74136600  | 2.08854800  | 2.08521300  |
| H | 5.01140100  | -0.03988100 | 2.23382600  |
| H | 3.90305800  | -0.95703600 | -1.83423000 |
| H | 2.62567300  | 1.11886200  | -1.96101000 |
| H | -2.35364100 | -1.16738800 | 2.73004200  |
| H | -4.69330200 | -1.61116000 | 2.90286300  |
| H | -6.72596400 | -2.30870000 | 1.66958400  |
| H | -4.88328700 | -1.13807700 | -2.03640800 |
| H | -2.83317000 | -0.49810400 | -0.83211700 |
| C | 5.33576200  | -1.89194900 | 0.38025400  |
| O | 5.92202100  | -2.19999600 | 1.39995400  |

## 2-conf7

|   |             |             |             |
|---|-------------|-------------|-------------|
| C | 5.42197500  | -1.28379800 | -1.11631300 |
| C | 3.89855300  | -1.22893200 | -1.30399800 |
| C | 3.17051200  | -0.67937100 | -0.07830300 |
| C | 3.74777000  | 0.68082400  | 0.39712300  |
| C | 5.27873500  | 0.63196800  | 0.53825000  |
| C | 5.98362300  | 0.08701300  | -0.71422900 |
| H | 3.32961300  | 0.90939900  | 1.38336100  |
| N | 3.36954000  | 1.73768800  | -0.55055800 |
| H | 2.10439100  | -0.56895400 | -0.27960200 |
| O | 3.35645500  | -1.61047900 | 1.03026700  |
| H | 4.05824600  | 2.01148600  | -1.23908000 |
| C | 2.36033600  | -2.12908700 | 1.77033600  |
| O | 2.63047600  | -2.62854300 | 2.84734600  |
| C | 0.94972700  | -2.12399500 | 1.25362100  |
| C | -0.06481800 | -1.66308300 | 2.10655900  |
| C | -1.38875900 | -1.69642700 | 1.69192000  |
| C | -1.72496100 | -2.21631000 | 0.42859000  |
| C | -0.70930800 | -2.70357600 | -0.41127400 |
| C | 0.62099000  | -2.64939300 | -0.00231700 |
| C | 2.16745000  | 2.33205500  | -0.72817400 |
| N | 1.23510700  | 2.06321500  | 0.24292100  |
| S | 1.92013500  | 3.37169300  | -2.04509800 |
| C | -0.13875400 | 2.34982900  | 0.28196300  |
| C | -0.71302300 | 2.56995200  | 1.54765100  |
| C | -2.07610400 | 2.79165600  | 1.67497800  |
| C | -2.86934700 | 2.79375200  | 0.52498600  |
| C | -2.31947900 | 2.56786300  | -0.73988800 |
| C | -0.95548800 | 2.34139100  | -0.86192700 |

|   |             |             |             |
|---|-------------|-------------|-------------|
| F | -2.98099400 | -2.08459100 | -2.33988200 |
| C | -3.57829700 | -2.77355700 | -1.33995600 |
| F | -4.90130100 | -2.68449700 | -1.51644800 |
| F | -3.23014000 | -4.07468700 | -1.47180000 |
| N | -4.29827100 | 3.03010600  | 0.64776300  |
| O | -4.98271300 | 3.04833200  | -0.38178100 |
| O | -4.77177400 | 3.20203600  | 1.77707900  |
| H | 5.88875900  | -1.62852500 | -2.04474000 |
| H | 5.66985100  | -2.02152600 | -0.34355900 |
| H | 3.65075300  | -0.57695800 | -2.15066800 |
| H | 3.49859800  | -2.21905300 | -1.54428600 |
| H | 5.50375800  | -0.02009700 | 1.38827900  |
| H | 5.64266800  | 1.63181300  | 0.79674400  |
| H | 7.05783000  | 0.01507400  | -0.51459700 |
| H | 5.88120100  | 0.78712000  | -1.55526400 |
| H | 0.19025000  | -1.27589000 | 3.08677200  |
| H | -2.17602200 | -1.32731600 | 2.33899700  |
| H | -0.93593100 | -3.12406700 | -1.38267200 |
| H | 1.39299000  | -3.03355600 | -0.65956400 |
| H | 1.60152900  | 1.71849500  | 1.12203100  |
| H | -0.08501000 | 2.57511700  | 2.43284500  |
| H | -2.52070500 | 2.96895600  | 2.64553400  |
| H | -2.95807000 | 2.55488700  | -1.61364700 |
| H | -0.52632500 | 2.15049300  | -1.83491200 |
| C | -3.15942300 | -2.21827600 | 0.05719700  |
| O | -4.04928400 | -1.80885200 | 0.77723000  |

## 2-conf8

|   |             |             |             |
|---|-------------|-------------|-------------|
| C | 1.23272800  | -4.73245600 | 1.13330100  |
| C | 0.17660700  | -3.81454800 | 0.49836200  |
| C | 0.53390300  | -2.33474200 | 0.61823300  |
| C | 1.96564600  | -2.01722200 | 0.10942100  |
| C | 3.00932800  | -2.96936600 | 0.71540100  |
| C | 2.63263600  | -4.45277100 | 0.56806100  |
| H | 2.20789400  | -0.99506300 | 0.40067000  |
| N | 1.99836500  | -2.11234600 | -1.36269300 |
| H | -0.18407600 | -1.71250700 | 0.08159400  |
| O | 0.52174000  | -1.97401400 | 2.03315300  |
| H | 2.15269200  | -3.03976300 | -1.73925500 |
| C | -0.12392100 | -0.91234800 | 2.54682500  |
| O | 0.20774700  | -0.49874600 | 3.64298100  |
| C | -1.26688300 | -0.28644200 | 1.80001900  |
| C | -1.28937500 | 1.11090300  | 1.67167600  |
| C | -2.36565400 | 1.73385600  | 1.05592000  |
| C | -3.45209100 | 0.97433600  | 0.58413300  |
| C | -3.43700200 | -0.42242500 | 0.73557300  |
| C | -2.34478900 | -1.04821900 | 1.33156100  |
| C | 1.41039400  | -1.28432200 | -2.25476500 |
| N | 1.24304800  | 0.04273400  | -1.90720600 |
| S | 0.85863400  | -1.83345500 | -3.75579600 |
| C | 2.14037100  | 0.91924800  | -1.27554600 |
| C | 1.65556600  | 2.19175900  | -0.91558700 |
| C | 2.49703100  | 3.12510100  | -0.33261000 |
| C | 3.83351800  | 2.78375700  | -0.10116300 |
| C | 4.33556400  | 1.53008200  | -0.45812000 |
| C | 3.49138100  | 0.59961400  | -1.04819100 |
| F | -5.45527400 | 0.01014000  | -1.50617500 |

|   |             |             |             |
|---|-------------|-------------|-------------|
| C | -5.80923900 | 0.91288600  | -0.56211800 |
| F | -6.72043900 | 1.73113000  | -1.10074900 |
| F | -6.40534200 | 0.23872000  | 0.44837200  |
| N | 4.71886900  | 3.75446900  | 0.51689200  |
| O | 5.89294900  | 3.42943900  | 0.73017400  |
| O | 4.26266100  | 4.86736200  | 0.80487400  |
| H | 0.95473800  | -5.77732500 | 0.96082500  |
| H | 1.24140100  | -4.58167100 | 2.21951800  |
| H | 0.07339800  | -4.04362400 | -0.56971500 |
| H | -0.80742800 | -3.98372600 | 0.94722600  |
| H | 3.09231000  | -2.72468200 | 1.77926400  |
| H | 3.98509900  | -2.76294700 | 0.26348900  |
| H | 3.38007400  | -5.06353600 | 1.08499100  |
| H | 2.67284200  | -4.76185900 | -0.48609800 |
| H | -0.46232000 | 1.70012300  | 2.05172700  |
| H | -2.38374700 | 2.81142200  | 0.94080800  |
| H | -4.26234800 | -1.03438900 | 0.39509900  |
| H | -2.35036400 | -2.12644000 | 1.44549800  |
| H | 0.54036900  | 0.50035400  | -2.47563300 |
| H | 0.61447200  | 2.44074600  | -1.09157200 |
| H | 2.12785100  | 4.10258900  | -0.05054000 |
| H | 5.37776900  | 1.29394600  | -0.28653000 |
| H | 3.88669900  | -0.36305200 | -1.34722500 |
| C | -4.56901800 | 1.71163300  | -0.05160700 |
| O | -4.58861700 | 2.91756900  | -0.20443800 |

## 2-conf9

|   |             |             |             |
|---|-------------|-------------|-------------|
| C | -0.35887200 | 3.93902700  | 0.63240500  |
| C | 0.09856000  | 2.70060500  | 1.41702200  |
| C | 0.07772500  | 1.42539900  | 0.57263200  |
| C | 0.82124000  | 1.57434600  | -0.77325300 |
| C | 0.39339000  | 2.84368500  | -1.52780800 |
| C | 0.45097500  | 4.11231400  | -0.66097600 |
| H | 0.60734100  | 0.68952200  | -1.37676800 |
| N | 2.26658600  | 1.59455500  | -0.53514300 |
| H | 0.48861400  | 0.58144300  | 1.12818600  |
| O | -1.29618600 | 1.09111900  | 0.20690500  |
| H | 2.70734000  | 2.50667400  | -0.52337200 |
| C | -2.00596400 | 0.32409000  | 1.04647800  |
| O | -1.57733900 | -0.11622400 | 2.10033800  |
| C | -3.39339800 | 0.06451000  | 0.54727800  |
| C | -4.24585000 | -0.70981800 | 1.34353100  |
| C | -5.54532600 | -0.97916500 | 0.92582400  |
| C | -6.00664500 | -0.47230700 | -0.30217900 |
| C | -5.14617700 | 0.30509400  | -1.09889200 |
| C | -3.85022800 | 0.57319000  | -0.67871900 |
| C | 3.06379800  | 0.51123100  | -0.40452900 |
| N | 4.36172100  | 0.85071000  | -0.07318300 |
| S | 2.50413900  | -1.07478500 | -0.57385400 |
| C | 5.53436500  | 0.08845400  | -0.06157500 |
| C | 6.56391400  | 0.51639100  | 0.80123200  |
| C | 7.77704100  | -0.15137700 | 0.84249500  |
| C | 7.96684900  | -1.26116800 | 0.01351000  |
| C | 6.96483700  | -1.69341700 | -0.85979900 |
| C | 5.75255700  | -1.01927900 | -0.90178500 |
| F | -7.88869300 | -2.81182800 | 0.24123100  |
| C | -8.36719400 | -1.56319500 | 0.03483800  |

|   |             |             |             |
|---|-------------|-------------|-------------|
| F | -9.55250200 | -1.67612000 | -0.57579900 |
| F | -8.57924000 | -0.99864200 | 1.24630700  |
| N | 9.23021000  | -1.97280000 | 0.05587600  |
| O | 9.37365100  | -2.96498600 | -0.66937800 |
| O | 10.11540900 | -1.55956300 | 0.81548500  |
| H | -0.26158400 | 4.82832200  | 1.26419200  |
| H | -1.42326600 | 3.84281800  | 0.38397900  |
| H | 1.12810100  | 2.84246600  | 1.77058400  |
| H | -0.51634000 | 2.54758400  | 2.30933300  |
| H | -0.63691300 | 2.68852400  | -1.86578400 |
| H | 1.00883200  | 2.94968900  | -2.42784100 |
| H | 0.07003400  | 4.96102100  | -1.23901700 |
| H | 1.49156000  | 4.36375300  | -0.40961000 |
| H | -3.88327000 | -1.09669800 | 2.28859400  |
| H | -6.18362200 | -1.57967200 | 1.56120200  |
| H | -5.50778100 | 0.69252200  | -2.04432100 |
| H | -3.19198700 | 1.17304000  | -1.29473900 |
| H | 4.47780000  | 1.78009300  | 0.31534100  |
| H | 6.40436100  | 1.37343500  | 1.44781100  |
| H | 8.56412100  | 0.17142900  | 1.51141600  |
| H | 7.14143400  | -2.54180500 | -1.50834600 |
| H | 4.98178600  | -1.34355600 | -1.58495600 |
| C | -7.37494400 | -0.71176600 | -0.81820800 |
| O | -7.78833300 | -0.28322700 | -1.87833300 |

## 2-conf10

|   |             |             |             |
|---|-------------|-------------|-------------|
| C | -0.80150800 | -2.65250900 | 0.13965700  |
| C | -0.85318200 | -1.46190000 | 1.10794800  |
| C | -0.41060100 | -0.15096600 | 0.45611100  |
| C | -1.13314100 | 0.14497700  | -0.87615000 |
| C | -1.13106200 | -1.07183200 | -1.81504800 |
| C | -1.60458900 | -2.36836500 | -1.13702700 |
| H | -0.62303500 | 0.98481800  | -1.35404500 |
| N | -2.51253100 | 0.57326800  | -0.60527700 |
| H | -0.53896400 | 0.68909200  | 1.13991600  |
| O | 1.00402600  | -0.22240500 | 0.10097200  |
| H | -3.24138300 | -0.09495000 | -0.82439300 |
| C | 1.90771700  | 0.12168700  | 1.02961800  |
| O | 1.62406300  | 0.49210200  | 2.15671700  |
| C | 3.31369700  | 0.00029200  | 0.52961800  |
| C | 4.35628300  | 0.29851100  | 1.41525000  |
| C | 5.68055700  | 0.20028100  | 0.99989500  |
| C | 5.97514800  | -0.19891700 | -0.31596900 |
| C | 4.92398000  | -0.49743500 | -1.20213900 |
| C | 3.60345800  | -0.40018900 | -0.78415300 |
| C | -2.88590700 | 1.83588700  | -0.33154000 |
| N | -4.23072900 | 2.08370100  | -0.16996100 |
| S | -1.80832600 | 3.14276900  | -0.20872800 |
| C | -5.32826400 | 1.21551100  | -0.06625700 |
| C | -6.56533900 | 1.66776200  | -0.56633200 |
| C | -7.70030500 | 0.88088300  | -0.45553900 |
| C | -7.59891800 | -0.37338600 | 0.15441000  |
| C | -6.38788000 | -0.83504800 | 0.67289900  |
| C | -5.25511900 | -0.03764600 | 0.57116700  |
| F | 8.50026200  | 1.27310700  | 0.55240900  |
| C | 8.55522500  | -0.00455400 | 0.11021400  |
| F | 9.72429200  | -0.16836000 | -0.51986000 |



|   |             |             |             |
|---|-------------|-------------|-------------|
| F | 8.55314300  | -0.81535400 | 1.19378400  |
| N | -8.78334500 | -1.20939000 | 0.26277900  |
| O | -8.67068800 | -2.32400700 | 0.78525000  |
| O | -9.85372500 | -0.77057000 | -0.17271200 |
| H | -1.18622800 | -3.54766200 | 0.63973600  |
| H | 0.24189500  | -2.86312200 | -0.12680300 |
| H | -1.88000900 | -1.31721000 | 1.46793400  |
| H | -0.23893000 | -1.64505200 | 1.99493600  |
| H | -0.10129100 | -1.20705600 | -2.16317400 |
| H | -1.73387300 | -0.84287300 | -2.70094100 |
| H | -1.50538000 | -3.19930400 | -1.84369000 |
| H | -2.67433600 | -2.30965100 | -0.89072000 |
| H | 4.12128500  | 0.60572400  | 2.42751000  |
| H | 6.46749400  | 0.43491100  | 1.70518800  |
| H | 5.15782600  | -0.80410000 | -2.21502800 |
| H | 2.79771200  | -0.63135600 | -1.46957500 |
| H | -4.44671200 | 3.07274100  | -0.18883100 |
| H | -6.62653500 | 2.63680400  | -1.04998700 |
| H | -8.65052200 | 1.22161500  | -0.84580300 |
| H | -6.34017600 | -1.79586000 | 1.16877600  |
| H | -4.33405300 | -0.37448700 | 1.02988200  |
| C | 7.35654600  | -0.32632800 | -0.83697400 |
| O | 7.62815000  | -0.66952300 | -1.97134600 |

## 2-conf11

|   |             |             |             |
|---|-------------|-------------|-------------|
| C | -0.07625700 | 4.58373600  | 0.99476400  |
| C | 0.59088600  | 3.33327400  | 1.58514500  |
| C | 0.68166000  | 2.18099500  | 0.58310900  |
| C | 1.31418600  | 2.60234500  | -0.76514000 |
| C | 0.67056500  | 3.88352700  | -1.32372900 |
| C | 0.61990700  | 5.02807100  | -0.29917600 |
| H | 1.14572900  | 1.80053600  | -1.49346300 |
| N | 2.75885200  | 2.80999900  | -0.59898200 |
| H | 1.22940900  | 1.34234400  | 1.01644500  |
| O | -0.65363100 | 1.70706000  | 0.23886400  |
| H | 3.08918700  | 3.76419500  | -0.53915200 |
| C | -1.18656700 | 0.72313700  | 0.98115200  |
| O | -0.61987200 | 0.19643200  | 1.92366900  |
| C | -2.55799200 | 0.34048000  | 0.52144200  |
| C | -3.22001200 | -0.68389600 | 1.20901800  |
| C | -4.49696100 | -1.07803800 | 0.82211700  |
| C | -5.12797700 | -0.44406900 | -0.26300400 |
| C | -4.45926200 | 0.58583500  | -0.94956600 |
| C | -3.18427600 | 0.97623000  | -0.56213400 |
| C | 3.74147500  | 1.89154200  | -0.46317600 |
| N | 3.34868900  | 0.58801000  | -0.63210900 |
| S | 5.33451800  | 2.39501900  | -0.16161300 |
| C | 4.05832100  | -0.60771300 | -0.43598700 |
| C | 3.70523000  | -1.70020500 | -1.24998100 |
| C | 4.31724400  | -2.93298500 | -1.08201300 |
| C | 5.29227600  | -3.07211700 | -0.09092800 |
| C | 5.64705100  | -2.00339600 | 0.73665500  |
| C | 5.02767400  | -0.77250600 | 0.56839900  |
| F | -6.58125200 | -3.11696400 | -0.07899200 |
| C | -7.26110000 | -1.94881000 | -0.01346200 |
| F | -8.46206000 | -2.14361900 | -0.57023800 |
| F | -7.45449000 | -1.65842700 | 1.29398100  |

|   |             |             |             |
|---|-------------|-------------|-------------|
| N | 5.94421900  | -4.35835400 | 0.08844600  |
| O | 6.82301200  | -4.45807100 | 0.95264800  |
| O | 5.59328700  | -5.30173800 | -0.63007000 |
| H | -0.05550900 | 5.39100300  | 1.73434600  |
| H | -1.13253500 | 4.37280500  | 0.78613000  |
| H | 1.61416400  | 3.57061200  | 1.90269700  |
| H | 0.06136700  | 2.98441600  | 2.47714400  |
| H | -0.34996700 | 3.62819000  | -1.62755200 |
| H | 1.20637400  | 4.18368900  | -2.23041100 |
| H | 0.09512100  | 5.88065500  | -0.74279400 |
| H | 1.63280500  | 5.38548600  | -0.06597800 |
| H | -2.72760500 | -1.16657200 | 2.04497400  |
| H | -4.98587300 | -1.87311900 | 1.37032200  |
| H | -4.95160800 | 1.07030800  | -1.78474700 |
| H | -2.67363300 | 1.76946900  | -1.09374800 |
| H | 2.45543500  | 0.45376400  | -1.09048500 |
| H | 2.95420700  | -1.57615300 | -2.02345600 |
| H | 4.05450200  | -3.77266800 | -1.71200700 |
| H | 6.38939200  | -2.14191600 | 1.51198700  |
| H | 5.28708500  | 0.05348100  | 1.21427700  |
| C | -6.48530400 | -0.80372500 | -0.73743100 |
| O | -7.04742500 | -0.26088300 | -1.66878800 |

## 2-conf12

|   |             |             |             |
|---|-------------|-------------|-------------|
| C | 1.40499500  | -4.02103000 | 1.72052500  |
| C | 1.58644000  | -3.72869700 | 0.22354900  |
| C | 1.53441700  | -2.23446800 | -0.09866300 |
| C | 2.47586500  | -1.38535300 | 0.78734900  |
| C | 2.31868200  | -1.72123600 | 2.27929400  |
| C | 2.40689000  | -3.22815800 | 2.57206700  |
| H | 2.22260500  | -0.33666700 | 0.63389500  |
| N | 3.87541700  | -1.60444100 | 0.37227200  |
| H | 1.75307200  | -2.05942000 | -1.15379900 |
| O | 0.19989200  | -1.70922800 | 0.16829100  |
| H | 4.33664500  | -2.40394900 | 0.78931400  |
| C | -0.69994800 | -1.73311300 | -0.82742900 |
| O | -0.47453700 | -2.17711800 | -1.94067100 |
| C | -2.01681900 | -1.15019000 | -0.42074700 |
| C | -3.05926200 | -1.16524200 | -1.35532500 |
| C | -4.30329800 | -0.63516300 | -1.02822500 |
| C | -4.51560500 | -0.07863100 | 0.24564900  |
| C | -3.46452100 | -0.06437600 | 1.18064800  |
| C | -2.22469900 | -0.59661700 | 0.85236900  |
| C | 4.45876200  | -1.21728300 | -0.78329500 |
| N | 3.98989900  | -0.07628600 | -1.40568300 |
| S | 5.71588800  | -2.10005300 | -1.49144700 |
| C | 3.63296900  | 1.16257800  | -0.85028400 |
| C | 3.03508600  | 2.10687000  | -1.70736000 |
| C | 2.70065500  | 3.36737200  | -1.24007900 |
| C | 2.96132200  | 3.68721800  | 0.09648400  |
| C | 3.56158600  | 2.76773000  | 0.96013700  |
| C | 3.90087200  | 1.50792100  | 0.48713000  |
| F | -6.71369800 | 1.18383200  | -1.45369400 |
| C | -7.00906400 | 0.49504500  | -0.32682700 |
| F | -8.09593300 | 1.05267400  | 0.21935200  |
| F | -7.33115900 | -0.76814200 | -0.68932300 |
| N | 2.60660300  | 5.00361000  | 0.59511500  |

|   |             |             |             |
|---|-------------|-------------|-------------|
| O | 2.82517300  | 5.26200400  | 1.78479800  |
| O | 2.10031100  | 5.81395100  | -0.19020300 |
| H | 1.52209600  | -5.09526900 | 1.89777800  |
| H | 0.38338800  | -3.76052900 | 2.02436700  |
| H | 2.56116400  | -4.10354900 | -0.11504000 |
| H | 0.83237200  | -4.24765800 | -0.37619200 |
| H | 1.33590600  | -1.35315500 | 2.59271700  |
| H | 3.06556700  | -1.16238900 | 2.85289800  |
| H | 2.21905000  | -3.39678400 | 3.63758200  |
| H | 3.42395900  | -3.60105800 | 2.38565600  |
| H | -2.88730400 | -1.59443100 | -2.33534700 |
| H | -5.09231500 | -0.66063700 | -1.76886500 |
| H | -3.63487000 | 0.36650100  | 2.16041500  |
| H | -1.41892200 | -0.58344900 | 1.57567700  |
| H | 4.24796900  | -0.03909900 | -2.38456800 |
| H | 2.83153400  | 1.84279800  | -2.73976600 |
| H | 2.23646500  | 4.09458700  | -1.89346500 |
| H | 3.77066300  | 3.04326000  | 1.98571100  |
| H | 4.38736000  | 0.80318900  | 1.14978300  |
| C | -5.80923700 | 0.50593500  | 0.67174500  |
| O | -6.00627200 | 1.00119600  | 1.76443200  |

## 2-conf13

|   |             |             |             |
|---|-------------|-------------|-------------|
| C | -0.90857800 | 5.94888200  | 0.45246200  |
| C | 0.22349200  | 4.92032800  | 0.30861900  |
| C | -0.33102100 | 3.49912800  | 0.19428000  |
| C | -1.32898800 | 3.38589200  | -0.96579300 |
| C | -2.46364000 | 4.42032300  | -0.83529000 |
| C | -1.89932600 | 5.84274600  | -0.71372500 |
| N | -1.80996500 | 2.01236800  | -1.19636000 |
| O | 0.75508300  | 2.57402500  | -0.10872000 |
| H | -1.59063900 | 1.65380500  | -2.11742100 |
| C | 1.39256100  | 1.97921300  | 0.90855300  |
| O | 1.13855900  | 2.17194800  | 2.08626100  |
| C | 2.45935600  | 1.03847700  | 0.43904600  |
| C | 3.17887900  | 0.32327000  | 1.40388800  |
| C | 4.17395500  | -0.56993200 | 1.01923800  |
| C | 4.46383400  | -0.75264800 | -0.34473700 |
| C | 3.74176300  | -0.02772700 | -1.31042200 |
| C | 2.74575900  | 0.85900600  | -0.92349500 |
| C | -2.47477400 | 1.17266300  | -0.37490800 |
| N | -2.57528500 | -0.10104800 | -0.91441000 |
| S | -3.06688400 | 1.58082800  | 1.15427900  |
| C | -3.39300900 | -1.17746900 | -0.55912800 |
| C | -2.92690700 | -2.46818700 | -0.88149800 |
| C | -3.69813200 | -3.58763300 | -0.61397200 |
| C | -4.95032600 | -3.41934600 | -0.01512000 |
| C | -5.43779800 | -2.14733100 | 0.30029400  |
| C | -4.66472800 | -1.02856400 | 0.02607900  |
| F | 6.97276400  | -1.78449700 | 1.07082400  |
| C | 6.28960700  | -2.55601500 | 0.19376900  |
| F | 7.17129900  | -3.35260400 | -0.42145000 |
| F | 5.44912600  | -3.34232500 | 0.90535100  |
| N | -5.76161000 | -4.58527100 | 0.27608300  |
| O | -6.85820400 | -4.42010600 | 0.82538200  |
| O | -5.32615600 | -5.70087900 | -0.03650300 |
| H | -0.48000800 | 6.95557000  | 0.50212900  |

|   |             |             |             |
|---|-------------|-------------|-------------|
| H | -1.43775800 | 5.78352600  | 1.40041300  |
| H | 0.81138300  | 5.14001400  | -0.59220800 |
| H | 0.90547600  | 4.96842800  | 1.16334200  |
| H | -3.07135000 | 4.18263600  | 0.04223000  |
| H | -3.11100200 | 4.33344900  | -1.71447900 |
| H | -2.72414900 | 6.55099300  | -0.57940700 |
| H | -1.39285300 | 6.12129000  | -1.64824400 |
| H | 2.95085700  | 0.47062100  | 2.45297000  |
| H | 4.71359900  | -1.11127500 | 1.78575400  |
| H | 3.97022000  | -0.17272700 | -2.35994400 |
| H | 2.18988600  | 1.41206500  | -1.67026800 |
| H | -1.88556100 | -0.32973100 | -1.62148300 |
| H | -1.94953500 | -2.58903900 | -1.33765800 |
| H | -3.33660700 | -4.57910200 | -0.85362500 |
| H | -6.41976800 | -2.03883900 | 0.74252800  |
| H | -5.04519900 | -0.04419700 | 0.25576300  |
| C | 5.50623300  | -1.68369900 | -0.83705400 |
| O | 5.79520500  | -1.82478800 | -2.00965900 |
| H | -0.79008600 | 3.18460500  | 1.13122400  |
| H | -0.77260500 | 3.61728900  | -1.88040900 |

## 2-conf14

|   |             |             |             |
|---|-------------|-------------|-------------|
| C | 2.35273200  | -5.24833800 | -1.33363400 |
| C | 1.07729000  | -4.39302500 | -1.33897200 |
| C | 1.22392900  | -3.18081900 | -0.41765200 |
| C | 2.45141300  | -2.34047300 | -0.79577000 |
| C | 3.73468000  | -3.19052700 | -0.80690500 |
| C | 3.57725000  | -4.41159200 | -1.72524100 |
| N | 2.57564300  | -1.10163900 | -0.00503100 |
| O | 0.06749700  | -2.30507700 | -0.56970500 |
| H | 2.33813800  | -0.26399000 | -0.52062500 |
| C | -0.99169000 | -2.50429500 | 0.22660900  |
| O | -1.06370900 | -3.38785700 | 1.06491800  |
| C | -2.08735200 | -1.51416500 | -0.02238500 |
| C | -3.24616900 | -1.60523800 | 0.75796200  |
| C | -4.29226000 | -0.70743200 | 0.57040300  |
| C | -4.18818100 | 0.29649700  | -0.40898800 |
| C | -3.02243600 | 0.38309300  | -1.19193100 |
| C | -1.97955000 | -0.51382800 | -1.00138100 |
| C | 2.82015700  | -0.94027400 | 1.30582100  |
| N | 2.94510100  | 0.36141400  | 1.75160300  |
| S | 2.94150900  | -2.17768300 | 2.46177100  |
| C | 3.13146000  | 1.56635700  | 1.06035500  |
| C | 2.65232700  | 2.74405100  | 1.66905000  |
| C | 2.84285500  | 3.97710600  | 1.06734700  |
| C | 3.51302200  | 4.03759500  | -0.15869500 |
| C | 4.01054400  | 2.88639400  | -0.77261000 |
| C | 3.82721700  | 1.65307800  | -0.16160000 |
| F | -7.19296400 | 0.04447000  | 0.03208100  |
| C | -6.56467200 | 1.23392000  | 0.17911000  |
| F | -7.41993900 | 2.19489600  | -0.18891800 |
| F | -6.29981900 | 1.39915700  | 1.49578400  |
| N | 3.70576800  | 5.32587000  | -0.80131800 |
| O | 4.27882300  | 5.35761000  | -1.89664300 |
| O | 3.28865300  | 6.33808900  | -0.22654100 |
| H | 2.22811800  | -6.09075900 | -2.02231000 |
| H | 2.50435400  | -5.67691900 | -0.33403000 |

|   |             |             |             |
|---|-------------|-------------|-------------|
| H | 0.87368300  | -4.03666500 | -2.35736900 |
| H | 0.21153400  | -4.98154700 | -1.01983600 |
| H | 3.96415400  | -3.51921800 | 0.21055200  |
| H | 4.56387900  | -2.55801800 | -1.14115100 |
| H | 4.48682200  | -5.02013300 | -1.67805600 |
| H | 3.47282700  | -4.07962700 | -2.76741100 |
| H | -3.31927300 | -2.38178300 | 1.51022500  |
| H | -5.17594200 | -0.80033900 | 1.18866100  |
| H | -2.94838700 | 1.15897300  | -1.94510400 |
| H | -1.08455000 | -0.44316900 | -1.60690400 |
| H | 2.87146700  | 0.43449500  | 2.75855400  |
| H | 2.12250000  | 2.68201300  | 2.61371200  |
| H | 2.46918000  | 4.88192400  | 1.52883000  |
| H | 4.55243300  | 2.96036500  | -1.70656800 |
| H | 4.26095700  | 0.77217300  | -0.61767400 |
| C | -5.25624500 | 1.28979500  | -0.67047200 |
| O | -5.18485900 | 2.16175700  | -1.51491300 |
| H | 1.27886400  | -3.48784500 | 0.62678100  |
| H | 2.28484700  | -1.97667400 | -1.81537800 |

## 2-conf15

|   |             |             |             |
|---|-------------|-------------|-------------|
| C | 2.32623400  | 4.48061300  | -1.97400400 |
| C | 0.97084700  | 3.79627600  | -1.74343300 |
| C | 1.07705900  | 2.68863900  | -0.69235400 |
| C | 1.65803700  | 3.23232800  | 0.62387500  |
| C | 3.01903100  | 3.92315700  | 0.39657200  |
| C | 2.89885900  | 5.03001100  | -0.66116300 |
| N | 1.65027300  | 2.24552600  | 1.72348600  |
| O | -0.25015100 | 2.18311000  | -0.37939600 |
| H | 1.05431200  | 2.47761600  | 2.50635600  |
| C | -0.71561600 | 1.13758800  | -1.08108700 |
| O | -0.09243600 | 0.57853100  | -1.96812400 |
| C | -2.08903100 | 0.72830900  | -0.65119300 |
| C | -2.69094800 | -0.34865500 | -1.31308900 |
| C | -3.96541800 | -0.77254700 | -0.95037600 |
| C | -4.65428500 | -0.11679800 | 0.08558000  |
| C | -4.04586000 | 0.96598300  | 0.74631400  |
| C | -2.77364600 | 1.38680500  | 0.38231900  |
| C | 2.13205500  | 0.98575200  | 1.80318100  |
| N | 3.02251500  | 0.62351700  | 0.82156700  |
| S | 1.67482300  | -0.01432100 | 3.09701800  |
| C | 3.54205200  | -0.63996500 | 0.50092200  |
| C | 4.84373900  | -0.68642600 | -0.03158400 |
| C | 5.40256800  | -1.89283500 | -0.42585900 |
| C | 4.65176600  | -3.06257900 | -0.28470300 |
| C | 3.35180500  | -3.03579500 | 0.22868100  |
| C | 2.79517900  | -1.82549700 | 0.61706400  |
| F | -6.88755500 | -1.48260300 | -1.48464500 |
| C | -6.72107900 | -1.71125900 | -0.16124300 |
| F | -7.92920100 | -1.93082000 | 0.37008300  |
| F | -5.99913100 | -2.84781100 | -0.02761800 |
| N | 5.23179700  | -4.33180200 | -0.68824900 |
| O | 4.56221400  | -5.36050400 | -0.53702900 |
| O | 6.37208300  | -4.33264200 | -1.16730800 |
| H | 2.20547600  | 5.28651900  | -2.70525800 |
| H | 3.03288000  | 3.76229200  | -2.41092500 |
| H | 0.23588100  | 4.53326200  | -1.39569300 |

|   |             |             |             |
|---|-------------|-------------|-------------|
| H | 0.58796700  | 3.36661900  | -2.67413400 |
| H | 3.78491900  | 3.21139000  | 0.06146100  |
| H | 3.36514700  | 4.32709100  | 1.35270200  |
| H | 3.88244000  | 5.48036400  | -0.83008900 |
| H | 2.24581400  | 5.82629800  | -0.28003500 |
| H | -2.15358700 | -0.84900500 | -2.11006400 |
| H | -4.40654400 | -1.60802800 | -1.47886200 |
| H | -4.58224600 | 1.46689100  | 1.54382500  |
| H | -2.30995400 | 2.22037000  | 0.89495500  |
| H | 3.49256700  | 1.38955900  | 0.35693300  |
| H | 5.42209100  | 0.22684700  | -0.12587300 |
| H | 6.40707400  | -1.93318600 | -0.82640900 |
| H | 2.78139100  | -3.95221300 | 0.30732800  |
| H | 1.78530600  | -1.79619000 | 1.00022900  |
| C | -6.01201100 | -0.50684200 | 0.53392000  |
| O | -6.62379100 | 0.05463700  | 1.42199900  |
| H | 1.66526400  | 1.85557300  | -1.08201100 |
| H | 0.96615900  | 4.00485500  | 0.97409400  |

## 2-conf16

|   |             |             |             |
|---|-------------|-------------|-------------|
| C | 2.86171000  | 3.02940500  | -2.12884900 |
| C | 1.40127900  | 2.62667600  | -1.87833600 |
| C | 1.27903200  | 1.65971100  | -0.69506000 |
| C | 1.89671800  | 2.27616700  | 0.56318600  |
| C | 3.36732500  | 2.66293700  | 0.32025200  |
| C | 3.49138800  | 3.62936800  | -0.86576100 |
| N | 1.69308300  | 1.49994500  | 1.81873900  |
| O | -0.12712000 | 1.42450600  | -0.40273800 |
| H | 1.45026600  | 2.09544400  | 2.60093200  |
| C | -0.76225800 | 0.45361700  | -1.07840400 |
| O | -0.22800600 | -0.26094900 | -1.90980400 |
| C | -2.20476400 | 0.34364900  | -0.69625600 |
| C | -2.97411000 | -0.65258000 | -1.30947000 |
| C | -4.32109200 | -0.79482400 | -0.99162600 |
| C | -4.91492500 | 0.06711400  | -0.05241300 |
| C | -4.13789700 | 1.06729800  | 0.56001500  |
| C | -2.79329400 | 1.20562300  | 0.24245100  |
| C | 1.30979600  | 0.22638300  | 2.04235200  |
| N | 1.69263200  | -0.75400000 | 1.14030500  |
| S | 0.36325200  | -0.19286700 | 3.38228300  |
| C | 2.99768200  | -1.03784600 | 0.69396600  |
| C | 3.14073100  | -1.93923000 | -0.37732800 |
| C | 4.40175700  | -2.30547400 | -0.82219000 |
| C | 5.52658500  | -1.76187900 | -0.19430200 |
| C | 5.40490100  | -0.87233500 | 0.87649600  |
| C | 4.14060100  | -0.51326700 | 1.32215300  |
| F | -7.29688400 | -0.98560700 | -1.64684500 |
| C | -7.23929700 | -1.12122000 | -0.30162900 |
| F | -8.49037400 | -1.05845200 | 0.16884200  |
| F | -6.75895300 | -2.35742400 | -0.03309400 |
| N | 6.85084400  | -2.13599400 | -0.65977600 |
| O | 7.83446700  | -1.63119100 | -0.10565700 |
| O | 6.94094400  | -2.94402500 | -1.59162400 |
| H | 2.90281100  | 3.74444100  | -2.95718500 |
| H | 3.43760100  | 2.14874400  | -2.44312800 |
| H | 0.80032600  | 3.51871000  | -1.66116700 |
| H | 0.97222400  | 2.15059300  | -2.76482600 |

|   |             |             |             |
|---|-------------|-------------|-------------|
| H | 3.96039200  | 1.76571800  | 0.12115500  |
| H | 3.76378000  | 3.11627900  | 1.23473900  |
| H | 4.54768800  | 3.86194300  | -1.03740700 |
| H | 2.99330800  | 4.57758400  | -0.62212800 |
| H | -2.50996200 | -1.31134000 | -2.03391700 |
| H | -4.89281700 | -1.57361300 | -1.47980600 |
| H | -4.60175500 | 1.72802600  | 1.28309600  |
| H | -2.19906800 | 1.97644000  | 0.71697100  |
| H | 1.08453800  | -1.56422300 | 1.17429000  |
| H | 2.25805400  | -2.34427700 | -0.86051300 |
| H | 4.51904100  | -2.99345800 | -1.64933700 |
| H | 6.29060100  | -0.48117400 | 1.36025500  |
| H | 4.04273200  | 0.15952100  | 2.16499700  |
| C | -6.34215700 | -0.01561600 | 0.33852400  |
| O | -6.87371400 | 0.73004100  | 1.13827400  |
| H | 1.73543800  | 0.70243900  | -0.94734400 |
| H | 1.34189900  | 3.20263400  | 0.75457200  |

## 2-conf17

|   |             |             |             |
|---|-------------|-------------|-------------|
| C | -0.80504900 | 5.98170500  | 0.70747400  |
| C | 0.30687900  | 4.92079500  | 0.63884900  |
| C | -0.31089500 | 3.52460200  | 0.53316800  |
| C | -1.21594200 | 3.41166800  | -0.70706800 |
| C | -2.34160200 | 4.46247800  | -0.62419300 |
| C | -1.75206300 | 5.87518100  | -0.49576800 |
| N | -1.69503300 | 2.04770100  | -0.98399700 |
| O | 0.69087600  | 2.46322100  | 0.61305900  |
| H | -1.47906400 | 1.72778500  | -1.92030000 |
| C | 1.60278300  | 2.26961100  | -0.34620900 |
| O | 1.69239300  | 2.92738800  | -1.37069700 |
| C | 2.51746900  | 1.12550800  | -0.02523500 |
| C | 3.48078500  | 0.76517300  | -0.97528900 |
| C | 4.34861800  | -0.29438400 | -0.72984300 |
| C | 4.26353700  | -1.00469000 | 0.48107000  |
| C | 3.29755400  | -0.63544100 | 1.43497700  |
| C | 2.42959900  | 0.41908700  | 1.18473900  |
| C | -2.40324900 | 1.19401500  | -0.21409200 |
| N | -2.51654800 | -0.05514300 | -0.80527100 |
| S | -3.02720600 | 1.56069600  | 1.31247700  |
| C | -3.36216400 | -1.12968900 | -0.51695100 |
| C | -2.92010700 | -2.41078100 | -0.90621700 |
| C | -3.71766400 | -3.52619000 | -0.70977300 |
| C | -4.97271500 | -3.36451800 | -0.11482200 |
| C | -5.43581800 | -2.10189400 | 0.26746300  |
| C | -4.63636700 | -0.98637600 | 0.06437800  |
| F | 5.61004100  | -2.99533100 | -1.38200600 |
| C | 6.20396100  | -2.62023500 | -0.22552700 |
| F | 6.89923900  | -3.66699200 | 0.23413300  |
| F | 7.08519100  | -1.63501800 | -0.51593800 |
| N | -5.81214700 | -4.52669500 | 0.10104400  |
| O | -6.90840100 | -4.36971300 | 0.65350400  |
| O | -5.40027300 | -5.63110700 | -0.27659400 |
| H | -0.35341400 | 6.97851600  | 0.75146800  |
| H | -1.37708500 | 5.85228400  | 1.63601200  |
| H | 0.94943200  | 5.11046700  | -0.22695800 |
| H | 0.93494100  | 4.96056400  | 1.53513200  |
| H | -2.98510400 | 4.24293900  | 0.23300400  |

|   |             |             |             |
|---|-------------|-------------|-------------|
| H | -2.95742400 | 4.38131500  | -1.52627500 |
| H | -2.56537700 | 6.60325500  | -0.40377300 |
| H | -1.20397700 | 6.12816100  | -1.41372500 |
| H | 3.54169500  | 1.31884100  | -1.90488800 |
| H | 5.08210100  | -0.55312000 | -1.48285800 |
| H | 3.23743400  | -1.18665800 | 2.36625400  |
| H | 1.68531600  | 0.69751500  | 1.92031900  |
| H | -1.81825900 | -0.26620000 | -1.50942400 |
| H | -1.94065000 | -2.52761400 | -1.35913800 |
| H | -3.37463600 | -4.51020100 | -1.00171500 |
| H | -6.41985600 | -1.99685700 | 0.70596400  |
| H | -4.99765300 | -0.00869800 | 0.34700500  |
| C | 5.14836100  | -2.14382200 | 0.82068200  |
| O | 5.10648400  | -2.74875700 | 1.87464100  |
| H | -0.90721800 | 3.32447400  | 1.42338400  |
| H | -0.60413400 | 3.64806200  | -1.57944800 |

## 2-conf18

|   |             |             |             |
|---|-------------|-------------|-------------|
| C | 3.93763300  | -4.50784100 | -1.00403500 |
| C | 2.46929000  | -4.06833500 | -0.88772300 |
| C | 2.36625900  | -2.77445800 | -0.07627200 |
| C | 3.20920000  | -1.64803400 | -0.69990400 |
| C | 4.68118500  | -2.09122100 | -0.82329700 |
| C | 4.79808700  | -3.39758400 | -1.62190400 |
| N | 3.04791100  | -0.34187800 | -0.03145800 |
| O | 0.97728300  | -2.38291100 | 0.16303800  |
| H | 2.85183300  | 0.41578800  | -0.67356200 |
| C | 0.15597300  | -2.02920000 | -0.83226900 |
| O | 0.47544300  | -1.94574700 | -2.00754200 |
| C | -1.22771100 | -1.72898900 | -0.33860800 |
| C | -2.17780800 | -1.29347900 | -1.27045400 |
| C | -3.47623900 | -0.99986800 | -0.86602500 |
| C | -3.83931900 | -1.14307300 | 0.48514600  |
| C | -2.88216600 | -1.58389200 | 1.41733300  |
| C | -1.58645700 | -1.87432700 | 1.01082200  |
| C | 3.29612800  | 0.00879900  | 1.24116700  |
| N | 3.07730700  | 1.33074400  | 1.57622500  |
| S | 3.88219600  | -1.01552600 | 2.46336600  |
| C | 2.44548000  | 2.37535300  | 0.88629000  |
| C | 2.91010900  | 3.68468500  | 1.12239900  |
| C | 2.30383700  | 4.76942500  | 0.51010300  |
| C | 1.22498500  | 4.54647300  | -0.35146400 |
| C | 0.73545700  | 3.26038900  | -0.58634900 |
| C | 1.33911800  | 2.17675500  | 0.03803300  |
| F | -5.92145200 | 0.80099600  | -0.59860800 |
| C | -6.29195700 | -0.35490600 | -0.00057100 |
| F | -7.45324400 | -0.13559400 | 0.62711800  |
| F | -6.51484600 | -1.26836000 | -0.97379700 |
| N | 0.59264200  | 5.67850500  | -1.00758600 |
| O | -0.34914400 | 5.46102600  | -1.77846400 |
| O | 1.02307900  | 6.81237200  | -0.76764100 |
| H | 3.99600900  | -5.41925100 | -1.60856000 |
| H | 4.32678600  | -4.76238000 | -0.00910000 |
| H | 2.04923600  | -3.91649600 | -1.88683100 |
| H | 1.87232300  | -4.83994400 | -0.39005300 |
| H | 5.10629900  | -2.22359000 | 0.17615400  |
| H | 5.24138100  | -1.28743900 | -1.31308700 |



|   |             |             |             |
|---|-------------|-------------|-------------|
| H | 5.84827600  | -3.70674200 | -1.66161900 |
| H | 4.47994200  | -3.22517800 | -2.65931100 |
| H | -1.89097800 | -1.18650100 | -2.30999000 |
| H | -4.18979500 | -0.66344400 | -1.60734600 |
| H | -3.16855500 | -1.69318000 | 2.45693000  |
| H | -0.85319700 | -2.21302000 | 1.73206500  |
| H | 3.50085800  | 1.57765600  | 2.46201400  |
| H | 3.75649000  | 3.84182700  | 1.78242900  |
| H | 2.66451800  | 5.77527900  | 0.68177000  |
| H | -0.12038700 | 3.11423800  | -1.23252200 |
| H | 0.91867800  | 1.18951600  | -0.10334600 |
| C | -5.19864600 | -0.85042600 | 0.99733100  |
| O | -5.52928900 | -0.97037500 | 2.16124500  |
| H | 2.71747500  | -2.95500200 | 0.93988400  |
| H | 2.82495700  | -1.47109100 | -1.70605200 |

## 2-conf19

|   |             |             |             |
|---|-------------|-------------|-------------|
| C | -2.12866600 | -4.50476100 | -1.99221300 |
| C | -0.83586400 | -3.68731300 | -1.83589800 |
| C | -1.03711100 | -2.56097000 | -0.81866400 |
| C | -1.48817800 | -3.12019600 | 0.54737500  |
| C | -2.79915500 | -3.91809300 | 0.38292300  |
| C | -2.61562400 | -5.04809800 | -0.64185700 |
| N | -1.50509000 | -2.11352300 | 1.62676700  |
| O | 0.12585800  | -1.68520900 | -0.72830400 |
| H | -0.87003500 | -2.29440400 | 2.39262000  |
| C | 1.29803800  | -2.11145000 | -0.23704100 |
| O | 1.49640000  | -3.22340700 | 0.22398200  |
| C | 2.35591100  | -1.05351700 | -0.31302800 |
| C | 3.61381700  | -1.34361700 | 0.22902800  |
| C | 4.63503200  | -0.40018500 | 0.17894500  |
| C | 4.40620500  | 0.84971500  | -0.42365800 |
| C | 3.14065200  | 1.13653500  | -0.96711400 |
| C | 2.12193100  | 0.19457100  | -0.91151400 |
| C | -2.07048200 | -0.88849400 | 1.70603900  |
| N | -3.03414800 | -0.61646800 | 0.76489100  |
| S | -1.62150100 | 0.17273300  | 2.95220700  |
| C | -3.66280800 | 0.59612600  | 0.44385300  |
| C | -4.98558700 | 0.52828100  | -0.03183700 |
| C | -5.65543700 | 1.67763900  | -0.42300400 |
| C | -4.99498300 | 2.90582100  | -0.33660300 |
| C | -3.67645400 | 2.99287900  | 0.11943200  |
| C | -3.00887100 | 1.83924600  | 0.50553400  |
| F | 6.76606800  | 1.40093800  | 1.41933000  |
| C | 6.85191400  | 1.64208400  | 0.09075100  |
| F | 7.65755900  | 2.69648900  | -0.08166700 |
| F | 7.44595500  | 0.57070900  | -0.48431400 |
| N | -5.69035000 | 4.11593600  | -0.73931900 |
| O | -5.10011300 | 5.19757800  | -0.63443700 |
| O | -6.84490400 | 4.01589600  | -1.17147700 |
| H | -1.95276900 | -5.32811300 | -2.69218500 |
| H | -2.91093900 | -3.87518800 | -2.43725600 |
| H | -0.02169000 | -4.33898500 | -1.50401100 |
| H | -0.54031800 | -3.24585000 | -2.79319500 |
| H | -3.62628700 | -3.27849100 | 0.04688800  |
| H | -3.08682000 | -4.31667000 | 1.36054700  |
| H | -3.56167400 | -5.58522100 | -0.76573700 |

|   |             |             |             |
|---|-------------|-------------|-------------|
| H | -1.88783000 | -5.77248600 | -0.25281900 |
| H | 3.78354000  | -2.31047200 | 0.68796200  |
| H | 5.59757600  | -0.65020200 | 0.60649600  |
| H | 2.97083200  | 2.10194400  | -1.42952200 |
| H | 1.14914400  | 0.42001900  | -1.33037400 |
| H | -3.47338400 | -1.42660100 | 0.34646300  |
| H | -5.49134600 | -0.43027800 | -0.08483300 |
| H | -6.67569400 | 1.63001300  | -0.78054500 |
| H | -3.17817800 | 3.95300400  | 0.15612200  |
| H | -1.98546900 | 1.89893400  | 0.84628200  |
| C | 5.44224100  | 1.90449700  | -0.52620200 |
| O | 5.26819400  | 2.98068900  | -1.06446200 |
| H | -1.79058800 | -1.87014000 | -1.20380300 |
| H | -0.72577600 | -3.82796400 | 0.87518700  |

## 2-conf20

|   |             |             |             |
|---|-------------|-------------|-------------|
| C | -3.19685400 | -1.90920500 | -3.16480800 |
| C | -1.73552200 | -1.58777500 | -2.80978100 |
| C | -1.63937200 | -1.15447300 | -1.34504700 |
| C | -2.17246600 | -2.25887400 | -0.41211300 |
| C | -3.64983900 | -2.52916900 | -0.74185400 |
| C | -3.78853800 | -2.95787800 | -2.21242600 |
| N | -1.87440600 | -2.04487900 | 1.03093200  |
| O | -0.30311000 | -0.68079800 | -0.99702100 |
| H | -1.09579800 | -2.60855200 | 1.34949500  |
| C | 0.75230500  | -1.50372100 | -0.95083000 |
| O | 0.70072200  | -2.71057400 | -1.12576400 |
| C | 2.02336700  | -0.77226100 | -0.64473700 |
| C | 3.20515200  | -1.51778800 | -0.55627400 |
| C | 4.41356200  | -0.88772400 | -0.27639200 |
| C | 4.45023000  | 0.50430500  | -0.08048900 |
| C | 3.26016600  | 1.24924900  | -0.17039400 |
| C | 2.05567400  | 0.61779800  | -0.45079000 |
| C | -2.69324000 | -1.73540700 | 2.06271200  |
| N | -3.72610100 | -0.84191600 | 1.85356200  |
| S | -2.48702500 | -2.42628700 | 3.59452400  |
| C | -3.67652600 | 0.41584600  | 1.22938600  |
| C | -2.46620300 | 1.07841800  | 0.95763100  |
| C | -2.48060000 | 2.34789500  | 0.39742100  |
| C | -3.70499800 | 2.95939100  | 0.11466600  |
| C | -4.91854400 | 2.32194000  | 0.39090900  |
| C | -4.89984600 | 1.05195700  | 0.94595100  |
| F | 6.98864400  | -0.46976300 | 1.30432000  |
| C | 7.04061600  | 0.46370900  | 0.32611600  |
| F | 8.05826500  | 1.28743000  | 0.60209400  |
| F | 7.32666500  | -0.17172200 | -0.83392300 |
| N | -3.71725400 | 4.28814400  | -0.47123700 |
| O | -4.80980300 | 4.82291600  | -0.69442700 |
| O | -2.63514600 | 4.83132200  | -0.72308100 |
| H | -3.25059600 | -2.26162400 | -4.20012900 |
| H | -3.79505000 | -0.98963100 | -3.11270600 |
| H | -1.10621500 | -2.46811900 | -2.97592000 |
| H | -1.35277300 | -0.78038900 | -3.44253200 |
| H | -4.25866100 | -1.63688900 | -0.56654100 |
| H | -4.02529300 | -3.31335600 | -0.07648000 |
| H | -4.84674500 | -3.12271800 | -2.44140100 |
| H | -3.27884300 | -3.91881400 | -2.36216300 |

|   |             |             |             |
|---|-------------|-------------|-------------|
| H | 3.16879800  | -2.59013100 | -0.70791100 |
| H | 5.31246900  | -1.48737400 | -0.21424700 |
| H | 3.29536400  | 2.32185500  | -0.01890800 |
| H | 1.14223400  | 1.19515500  | -0.52041200 |
| H | -4.46935700 | -0.94060100 | 2.53492400  |
| H | -1.51858400 | 0.60896600  | 1.18976300  |
| H | -1.55384700 | 2.86826400  | 0.19245400  |
| H | -5.85582900 | 2.81384700  | 0.16552500  |
| H | -5.83279100 | 0.54157900  | 1.16038600  |
| C | 5.69533400  | 1.24913500  | 0.22197900  |
| O | 5.74484200  | 2.45122700  | 0.39707400  |
| H | -2.23050100 | -0.24854100 | -1.20738200 |
| H | -1.61661600 | -3.17022800 | -0.64268800 |

## 2-conf21

|   |             |             |             |
|---|-------------|-------------|-------------|
| C | -0.35084700 | 6.29479300  | 0.29634000  |
| C | 0.65472800  | 5.13611900  | 0.20366200  |
| C | 0.03160600  | 3.84747400  | 0.74526200  |
| C | -1.26461200 | 3.47421700  | 0.00841700  |
| C | -2.26281900 | 4.64641000  | 0.10251100  |
| C | -1.65666300 | 5.95098100  | -0.43229200 |
| N | -1.82437400 | 2.24783900  | 0.57643100  |
| O | 0.98807700  | 2.74373400  | 0.80186100  |
| H | -1.77510700 | 2.16430600  | 1.58620700  |
| C | 1.52556300  | 2.21669500  | -0.30728000 |
| O | 1.28688500  | 2.58889100  | -1.44366100 |
| C | 2.46774500  | 1.09367300  | 0.00664500  |
| C | 3.09070400  | 0.44172500  | -1.06441300 |
| C | 3.97049300  | -0.61051200 | -0.83141800 |
| C | 4.23834500  | -1.02221300 | 0.48631800  |
| C | 3.61178400  | -0.36275000 | 1.55960900  |
| C | 2.73358800  | 0.68678200  | 1.32368600  |
| C | -2.49005800 | 1.28998800  | -0.10319000 |
| N | -3.03820400 | 0.33404500  | 0.73026600  |
| S | -2.66785600 | 1.30005100  | -1.78671000 |
| C | -3.64135800 | -0.89699800 | 0.45180900  |
| C | -4.55126300 | -1.38654700 | 1.41143000  |
| C | -5.16406000 | -2.61758800 | 1.24507400  |
| C | -4.86734900 | -3.37208900 | 0.10582300  |
| C | -3.95681100 | -2.91317500 | -0.84991400 |
| C | -3.34028100 | -1.68168000 | -0.67712000 |
| F | 4.97650300  | -3.46659300 | -1.17708800 |
| C | 5.87487000  | -2.89539200 | -0.34175600 |
| F | 6.66487500  | -3.86552600 | 0.13285900  |
| F | 6.64438000  | -2.05848300 | -1.07573500 |
| N | -5.51086400 | -4.65825200 | -0.08271100 |
| O | -5.25546700 | -5.30202600 | -1.10810300 |
| O | -6.29007800 | -5.06178700 | 0.78994100  |
| H | 0.09928300  | 7.19896800  | -0.12694300 |
| H | -0.56648500 | 6.51315800  | 1.35114800  |
| H | 0.95483500  | 4.98802900  | -0.83755400 |
| H | 1.55738900  | 5.35825400  | 0.78254900  |
| H | -2.55995200 | 4.77795400  | 1.15174400  |
| H | -3.16443100 | 4.37551200  | -0.45590700 |
| H | -2.38166500 | 6.76450800  | -0.32037300 |
| H | -1.45965800 | 5.84868800  | -1.50796700 |
| H | 2.87916800  | 0.76460100  | -2.07693300 |

|   |             |             |             |
|---|-------------|-------------|-------------|
| H | 4.43716400  | -1.09763600 | -1.67791900 |
| H | 3.82277300  | -0.68467200 | 2.57279900  |
| H | 2.25373500  | 1.19121200  | 2.15308700  |
| H | -3.09682300 | 0.59538800  | 1.70812400  |
| H | -4.78203700 | -0.78940200 | 2.28794500  |
| H | -5.86907900 | -2.98840800 | 1.97759200  |
| H | -3.72496400 | -3.52387400 | -1.71301400 |
| H | -2.62722800 | -1.33096400 | -1.40797700 |
| C | 5.16094100  | -2.13315800 | 0.81877600  |
| O | 5.40601300  | -2.50013400 | 1.95180800  |
| H | -0.19466200 | 3.98736900  | 1.80810100  |
| H | -1.04319400 | 3.26619800  | -1.03820100 |

## 2-conf22

|   |             |             |             |
|---|-------------|-------------|-------------|
| C | -2.28050700 | -4.80637800 | -2.03822100 |
| C | -0.95600100 | -4.05253900 | -1.83593100 |
| C | -1.22249600 | -2.65011200 | -1.28303600 |
| C | -2.01193200 | -2.68928900 | 0.03427600  |
| C | -3.33675100 | -3.44749700 | -0.18314500 |
| C | -3.09270700 | -4.85735800 | -0.73771300 |
| N | -2.25114900 | -1.32494900 | 0.51469400  |
| O | -0.00923700 | -1.84081900 | -1.19205100 |
| H | -2.38980500 | -0.61445200 | -0.19411700 |
| C | 0.99333400  | -2.15796700 | -0.35940900 |
| O | 0.99991800  | -3.11943200 | 0.39008000  |
| C | 2.12412600  | -1.17823300 | -0.44804300 |
| C | 3.21052100  | -1.34955200 | 0.41842400  |
| C | 4.28610900  | -0.46790100 | 0.38014300  |
| C | 4.28645700  | 0.59874700  | -0.53637600 |
| C | 3.19374800  | 0.76540700  | -1.40678100 |
| C | 2.11978400  | -0.11366900 | -1.36316500 |
| C | -2.28686200 | -0.94406600 | 1.80020600  |
| N | -2.60557300 | 0.37138700  | 2.06291700  |
| S | -1.92881700 | -1.95828100 | 3.11641300  |
| C | -3.15181800 | 1.37104400  | 1.24527500  |
| C | -2.80379700 | 2.70662300  | 1.52853600  |
| C | -3.34529700 | 3.74742400  | 0.79157100  |
| C | -4.23766700 | 3.45305000  | -0.24413100 |
| C | -4.61039100 | 2.13859100  | -0.53183700 |
| C | -4.07552500 | 1.09902100  | 0.21748900  |
| F | 6.23957300  | 1.54300500  | 1.60797700  |
| C | 6.61898500  | 1.44316900  | 0.31293400  |
| F | 7.52280000  | 2.40141400  | 0.07705000  |
| F | 7.23466000  | 0.24856100  | 0.15530200  |
| N | -4.79948800 | 4.53898500  | -1.02940100 |
| O | -5.56226200 | 4.25798800  | -1.96098500 |
| O | -4.49115000 | 5.69908300  | -0.73349400 |
| H | -2.06827100 | -5.81826500 | -2.39911100 |
| H | -2.87171300 | -4.30980800 | -2.81946400 |
| H | -0.31666500 | -4.60506100 | -1.14142900 |
| H | -0.41539200 | -3.95716700 | -2.78336600 |
| H | -3.96551600 | -2.87757800 | -0.88017100 |
| H | -3.86983300 | -3.48961400 | 0.77189700  |
| H | -4.05315100 | -5.35583300 | -0.90728400 |
| H | -2.55253700 | -5.45537400 | 0.00848300  |
| H | 3.20401000  | -2.17482700 | 1.12066800  |
| H | 5.11167800  | -0.62203400 | 1.06313100  |

|   |             |             |             |
|---|-------------|-------------|-------------|
| H | 3.20037600  | 1.58904500  | -2.11123300 |
| H | 1.28045100  | 0.01912200  | -2.03434600 |
| H | -2.36945600 | 0.64840500  | 3.00750100  |
| H | -2.09940100 | 2.91942800  | 2.32553900  |
| H | -3.07404000 | 4.77402300  | 1.00100900  |
| H | -5.32720200 | 1.93684300  | -1.31722800 |
| H | -4.41483500 | 0.08808000  | 0.02901000  |
| C | 5.39312600  | 1.57841000  | -0.64405300 |
| O | 5.41375600  | 2.49877200  | -1.43835300 |
| H | -1.79901200 | -2.08567400 | -2.02409100 |
| H | -1.42329100 | -3.19785000 | 0.79788100  |

## 2-conf23

|   |             |             |             |
|---|-------------|-------------|-------------|
| C | 1.90150000  | -5.43408500 | -1.67995700 |
| C | 0.76511200  | -4.40970000 | -1.52709000 |
| C | 0.87176700  | -3.70340000 | -0.17448500 |
| C | 2.22526000  | -2.98331800 | -0.01996300 |
| C | 3.35091800  | -4.03268200 | -0.13684400 |
| C | 3.27573500  | -4.78279400 | -1.47490000 |
| N | 2.32120300  | -2.26522600 | 1.25410400  |
| O | -0.30991400 | -2.87850900 | 0.08100700  |
| H | 2.37874500  | -2.83562600 | 2.08970100  |
| C | -0.55103600 | -1.73648800 | -0.56060200 |
| O | 0.24664300  | -1.17343300 | -1.30331700 |
| C | -1.90854100 | -1.18760200 | -0.25893500 |
| C | -2.27150200 | 0.03278800  | -0.84177100 |
| C | -3.52385600 | 0.58472200  | -0.59102400 |
| C | -4.42971200 | -0.08546300 | 0.24987900  |
| C | -4.06071600 | -1.31198600 | 0.83176100  |
| C | -2.81053000 | -1.86077200 | 0.58035000  |
| C | 2.61563300  | -0.96400000 | 1.47707700  |
| N | 2.46275600  | -0.13529200 | 0.39189000  |
| S | 3.05753100  | -0.45303100 | 3.03579600  |
| C | 2.89066700  | 1.18055700  | 0.19034200  |
| C | 2.16787400  | 1.94418100  | -0.74909200 |
| C | 2.55163200  | 3.24001200  | -1.05353000 |
| C | 3.67183700  | 3.78168300  | -0.41556500 |
| C | 4.41218200  | 3.03582300  | 0.50666200  |
| C | 4.02610400  | 1.73755800  | 0.80752600  |
| F | -5.40642400 | 2.80032600  | 0.34308600  |
| C | -6.23059200 | 1.79910900  | -0.04291300 |
| F | -7.47029100 | 2.11660300  | 0.34746900  |
| F | -6.22150800 | 1.75671400  | -1.39535100 |
| N | 4.07867300  | 5.13879600  | -0.72410000 |
| O | 5.06127000  | 5.60919800  | -0.13686700 |
| O | 3.42781300  | 5.77423800  | -1.56351200 |
| H | 1.84199300  | -5.89703300 | -2.67036200 |
| H | 1.76456800  | -6.23917600 | -0.94585500 |
| H | 0.81640800  | -3.66785200 | -2.33217500 |
| H | -0.20984600 | -4.90297800 | -1.59153000 |
| H | 3.27146400  | -4.74348500 | 0.69696000  |
| H | 4.31186900  | -3.51913700 | -0.03250800 |
| H | 4.06490400  | -5.54114400 | -1.51263600 |
| H | 3.47404300  | -4.07950100 | -2.29467200 |
| H | -1.56908100 | 0.54290500  | -1.49007100 |
| H | -3.77957800 | 1.52909000  | -1.05400100 |
| H | -4.76428300 | -1.82297500 | 1.47858100  |

|   |             |             |             |
|---|-------------|-------------|-------------|
| H | -2.53012700 | -2.80490700 | 1.03024600  |
| H | 1.82147200  | -0.47055300 | -0.32607700 |
| H | 1.29877800  | 1.51261400  | -1.23478500 |
| H | 1.99222400  | 3.82973000  | -1.76799100 |
| H | 5.28846400  | 3.46800400  | 0.97243200  |
| H | 4.60234800  | 1.15572900  | 1.51184400  |
| C | -5.78197500 | 0.43422000  | 0.56722600  |
| O | -6.57947000 | -0.13821900 | 1.28390600  |
| H | 0.78471100  | -4.44317700 | 0.62684700  |
| H | 2.34870400  | -2.26912100 | -0.83144400 |

## 2-conf24

|   |             |             |             |
|---|-------------|-------------|-------------|
| C | 2.88407600  | -2.99720300 | -3.08975700 |
| C | 1.51008000  | -2.39406000 | -2.75657300 |
| C | 1.23895700  | -2.50635100 | -1.25560600 |
| C | 2.31953900  | -1.80079100 | -0.41966800 |
| C | 3.68492600  | -2.44045000 | -0.74825400 |
| C | 3.99162700  | -2.34754800 | -2.25019300 |
| N | 1.95867000  | -1.93344300 | 1.00866700  |
| O | -0.11964400 | -2.10631400 | -0.89598200 |
| H | 1.24757600  | -2.62517800 | 1.21461900  |
| C | -0.55569000 | -0.84794200 | -1.06512000 |
| O | 0.12816100  | 0.07292400  | -1.47756900 |
| C | -1.99422700 | -0.69634600 | -0.67702900 |
| C | -2.57460500 | 0.57264400  | -0.79313100 |
| C | -3.90796400 | 0.76940400  | -0.44820800 |
| C | -4.67783600 | -0.31024200 | 0.02014700  |
| C | -4.09018800 | -1.58328900 | 0.13517700  |
| C | -2.75935400 | -1.77691800 | -0.21060100 |
| C | 2.69212400  | -1.62340300 | 2.09707800  |
| N | 3.64994800  | -0.63676100 | 2.01056700  |
| S | 2.48771500  | -2.44875300 | 3.56720600  |
| C | 3.63653900  | 0.58640000  | 1.32182900  |
| C | 4.86145900  | 1.26791500  | 1.18425000  |
| C | 4.90949400  | 2.50678700  | 0.56574500  |
| C | 3.72488000  | 3.06677200  | 0.07625900  |
| C | 2.49927200  | 2.41072800  | 0.21107300  |
| C | 2.45446700  | 1.17332500  | 0.83833300  |
| F | -6.18916200 | 2.13410100  | 1.04993100  |
| C | -6.80213800 | 1.20506100  | 0.28034800  |
| F | -8.08220800 | 1.13741400  | 0.66401600  |
| F | -6.77732600 | 1.64807600  | -0.99802400 |
| N | 3.76935400  | 4.36150300  | -0.58073200 |
| O | 2.71544500  | 4.83577200  | -1.02074700 |
| O | 4.86002700  | 4.93706100  | -0.67354100 |
| H | 3.08688700  | -2.86858400 | -4.15803900 |
| H | 2.86677200  | -4.07848500 | -2.89847800 |
| H | 1.47891000  | -1.34366000 | -3.05975900 |
| H | 0.71483000  | -2.92057100 | -3.29414300 |
| H | 3.66776000  | -3.49133100 | -0.43170200 |
| H | 4.46872600  | -1.94407200 | -0.16981800 |
| H | 4.95485700  | -2.82752500 | -2.45311800 |
| H | 4.09819300  | -1.29256900 | -2.53594800 |
| H | -1.97477300 | 1.39954200  | -1.15470100 |
| H | -4.33153600 | 1.76061100  | -0.54721000 |
| H | -4.68936100 | -2.41107800 | 0.49627300  |
| H | -2.31163700 | -2.75883100 | -0.12174700 |

|   |             |             |             |
|---|-------------|-------------|-------------|
| H | 4.33045900  | -0.69552900 | 2.75848500  |
| H | 5.77341300  | 0.81700700  | 1.56100100  |
| H | 5.84834500  | 3.03284600  | 0.45154100  |
| H | 1.59262300  | 2.87080000  | -0.15965500 |
| H | 1.50132100  | 0.67733500  | 0.96798600  |
| C | -6.10271800 | -0.18472900 | 0.40869700  |
| O | -6.77849300 | -1.10500600 | 0.82640300  |
| H | 1.22741100  | -3.56564500 | -0.97716000 |
| H | 2.33797600  | -0.74454000 | -0.69382300 |

## 2-conf25

|   |             |             |             |
|---|-------------|-------------|-------------|
| C | 0.54654100  | 6.30148100  | -0.10326100 |
| C | -0.46988900 | 5.18043400  | 0.16208800  |
| C | 0.01009700  | 3.85444300  | -0.42279000 |
| C | 1.38499400  | 3.46368000  | 0.13413100  |
| C | 2.40422800  | 4.58386400  | -0.15298000 |
| C | 1.93744600  | 5.92605500  | 0.42470000  |
| N | 1.81189400  | 2.18392700  | -0.43289400 |
| O | -0.98240800 | 2.84668100  | -0.06123500 |
| H | 1.44853700  | 1.96502100  | -1.35622000 |
| C | -1.27077600 | 1.87651600  | -0.93884800 |
| O | -0.69857100 | 1.73086500  | -2.00999300 |
| C | -2.37084600 | 0.98153000  | -0.46641500 |
| C | -2.77833600 | -0.06147300 | -1.30718400 |
| C | -3.79942700 | -0.92086400 | -0.91435500 |
| C | -4.42167900 | -0.74611000 | 0.33446200  |
| C | -4.00587100 | 0.30093700  | 1.17710900  |
| C | -2.99016300 | 1.16066100  | 0.78054800  |
| C | 2.59171200  | 1.27194400  | 0.18145300  |
| N | 2.93026700  | 0.22233800  | -0.65253800 |
| S | 3.13356800  | 1.43548100  | 1.77718100  |
| C | 3.54263900  | -1.00528300 | -0.38323600 |
| C | 4.23277900  | -1.61918200 | -1.44865800 |
| C | 4.83282200  | -2.85697600 | -1.28534800 |
| C | 4.74484900  | -3.49291000 | -0.04310700 |
| C | 4.05206200  | -2.90974100 | 1.02165300  |
| C | 3.44814700  | -1.67173400 | 0.85287700  |
| F | -6.50534200 | -2.26752300 | -1.26925300 |
| C | -6.04455100 | -2.76056400 | -0.09653800 |
| F | -7.04678100 | -3.42638600 | 0.48839100  |
| F | -5.06689000 | -3.65212800 | -0.38085400 |
| N | 5.37824400  | -4.78438200 | 0.14079400  |
| O | 5.30832600  | -5.32386800 | 1.25230600  |
| O | 5.96392000  | -5.29717700 | -0.82135900 |
| H | 0.19423100  | 7.22728100  | 0.36349600  |
| H | 0.60467900  | 6.49440000  | -1.18294000 |
| H | -0.61726000 | 5.05709500  | 1.24238100  |
| H | -1.44357700 | 5.42537000  | -0.27394900 |
| H | 2.53954500  | 4.66925000  | -1.23924300 |
| H | 3.36901500  | 4.28969000  | 0.27101500  |
| H | 2.66362400  | 6.70695200  | 0.17456900  |
| H | 1.90783500  | 5.86049000  | 1.52076000  |
| H | -2.29178000 | -0.19186500 | -2.26657900 |
| H | -4.09660400 | -1.71779700 | -1.58385800 |
| H | -4.48979000 | 0.42981500  | 2.13826300  |
| H | -2.67538200 | 1.96726400  | 1.43080800  |
| H | 2.80153800  | 0.40248000  | -1.64194900 |

|   |             |             |             |
|---|-------------|-------------|-------------|
| H | 4.30391400  | -1.11339000 | -2.40630700 |
| H | 5.37106700  | -3.32301500 | -2.10033900 |
| H | 3.97737300  | -3.42974400 | 1.96805600  |
| H | 2.90232300  | -1.22464300 | 1.67008500  |
| C | -5.51485600 | -1.61834100 | 0.82637400  |
| O | -6.04048600 | -1.50202900 | 1.91629200  |
| H | 0.04605100  | 3.90932300  | -1.51497500 |
| H | 1.29807000  | 3.32348900  | 1.21579400  |

## 2-conf26

|   |             |             |             |
|---|-------------|-------------|-------------|
| C | -2.77891900 | -4.71114500 | -2.03259800 |
| C | -1.39380900 | -4.17471000 | -1.64205800 |
| C | -1.48304500 | -2.74511800 | -1.11314700 |
| C | -2.44525900 | -2.64633600 | 0.07654600  |
| C | -3.83695600 | -3.17380700 | -0.32587700 |
| C | -3.76183000 | -4.60995400 | -0.85940900 |
| N | -2.51509000 | -1.25978100 | 0.55143400  |
| O | -0.13140100 | -2.36718800 | -0.70659700 |
| H | -2.23850500 | -0.54797200 | -0.11882500 |
| C | 0.28128100  | -1.10928600 | -0.90819600 |
| O | -0.44432300 | -0.20863300 | -1.30727500 |
| C | 1.72796000  | -0.91890300 | -0.58654900 |
| C | 2.26323800  | 0.37057700  | -0.69290400 |
| C | 3.60665700  | 0.59724700  | -0.41109000 |
| C | 4.43060100  | -0.47191800 | -0.01682700 |
| C | 3.88703900  | -1.76501300 | 0.09073500  |
| C | 2.54626700  | -1.98907900 | -0.19200700 |
| C | -2.74632000 | -0.88937700 | 1.81840500  |
| N | -2.81372500 | 0.46270800  | 2.08234200  |
| S | -2.92220300 | -1.96858200 | 3.12059800  |
| C | -2.94073300 | 1.56962900  | 1.23180700  |
| C | -2.42682100 | 2.79989800  | 1.68912600  |
| C | -2.55826300 | 3.94768100  | 0.92484300  |
| C | -3.20424000 | 3.86822600  | -0.31312100 |
| C | -3.73624400 | 2.66389400  | -0.77880400 |
| C | -3.61187900 | 1.51767800  | -0.00555000 |
| F | 6.40141200  | 1.56995000  | -1.10499500 |
| C | 6.52621100  | 1.09556700  | 0.15598200  |
| F | 7.83106300  | 1.05169900  | 0.44837400  |
| F | 5.94544200  | 1.98848000  | 0.99059500  |
| N | -3.33497900 | 5.06462700  | -1.12563100 |
| O | -3.89086600 | 4.97146900  | -2.22642900 |
| O | -2.88449000 | 6.12814500  | -0.68357800 |
| H | -2.68334500 | -5.74939600 | -2.36718800 |
| H | -3.16673800 | -4.13875600 | -2.88594500 |
| H | -0.95252500 | -4.81043900 | -0.86427600 |
| H | -0.71338700 | -4.18947200 | -2.49933200 |
| H | -4.25805200 | -2.51084800 | -1.09295700 |
| H | -4.49328800 | -3.11440300 | 0.54752300  |
| H | -4.75986200 | -4.93929800 | -1.16779200 |
| H | -3.44144000 | -5.28374000 | -0.05325000 |
| H | 1.62183800  | 1.18911100  | -0.99754500 |
| H | 3.99587500  | 1.60324400  | -0.50096900 |
| H | 4.52820600  | -2.58429100 | 0.39448200  |
| H | 2.13165500  | -2.98613800 | -0.11101900 |
| H | -2.74903300 | 0.66851700  | 3.07151200  |
| H | -1.91623500 | 2.84518900  | 2.64523900  |



|   |             |             |             |
|---|-------------|-------------|-------------|
| H | -2.15708400 | 4.89165700  | 1.27029100  |
| H | -4.25810500 | 2.63188600  | -1.72645600 |
| H | -4.07052300 | 0.60001400  | -0.35099900 |
| C | 5.87123000  | -0.31447600 | 0.29680500  |
| O | 6.59222000  | -1.22323000 | 0.65999500  |
| H | -1.79365300 | -2.06075300 | -1.90849300 |
| H | -2.05136800 | -3.25300200 | 0.89805800  |

## 2-conf27

|   |             |             |             |
|---|-------------|-------------|-------------|
| C | -1.02012300 | 5.35582100  | -1.04954700 |
| C | 0.10827900  | 4.32526400  | -1.20226700 |
| C | 0.04622600  | 3.26910500  | -0.10099300 |
| C | -1.31658000 | 2.56307300  | -0.07417800 |
| C | -2.44205100 | 3.60491900  | 0.09510200  |
| C | -2.39286500 | 4.67284900  | -1.00552100 |
| N | -1.32919500 | 1.56149600  | 1.00062800  |
| O | 1.10202300  | 2.30328000  | -0.37830200 |
| H | -0.67633000 | 1.69989400  | 1.76457500  |
| C | 1.79961700  | 1.79234800  | 0.64809800  |
| O | 1.54784600  | 2.01873900  | 1.82227400  |
| C | 2.91725500  | 0.90775800  | 0.20066600  |
| C | 3.71450700  | 0.30780700  | 1.18309100  |
| C | 4.76683800  | -0.52620000 | 0.81919400  |
| C | 5.02925600  | -0.77147500 | -0.54035500 |
| C | 4.22492900  | -0.16641100 | -1.52329200 |
| C | 3.17742200  | 0.66853200  | -1.15785000 |
| C | -2.16187300 | 0.51374200  | 1.16694200  |
| N | -3.00244200 | 0.25979700  | 0.11122100  |
| S | -2.07745300 | -0.41903000 | 2.58554900  |
| C | -4.07721700 | -0.63349000 | -0.00959200 |
| C | -4.37108600 | -1.10393800 | -1.30412300 |
| C | -5.45113900 | -1.94467800 | -1.52313000 |
| C | -6.24629700 | -2.31891900 | -0.43647000 |
| C | -5.98056100 | -1.85165600 | 0.85342900  |
| C | -4.90051600 | -1.00648400 | 1.06762300  |
| F | 7.69915200  | -1.38942000 | 0.79195400  |
| C | 7.06403200  | -2.32002600 | 0.04264000  |
| F | 7.99718300  | -3.07188900 | -0.55238500 |
| F | 6.36496400  | -3.11792200 | 0.88256000  |
| N | -7.37645800 | -3.20449800 | -0.65437800 |
| O | -8.05763800 | -3.54224900 | 0.32113600  |
| O | -7.61322900 | -3.58509700 | -1.80725100 |
| H | -0.97225800 | 6.06972700  | -1.87825800 |
| H | -0.86802400 | 5.93146100  | -0.12692500 |
| H | 0.02999300  | 3.82482000  | -2.17560100 |
| H | 1.08829000  | 4.81109100  | -1.16468100 |
| H | -2.32861400 | 4.07475100  | 1.08029400  |
| H | -3.40953800 | 3.09332300  | 0.09764400  |
| H | -3.18179000 | 5.41212900  | -0.83161400 |
| H | -2.60443200 | 4.20800800  | -1.97795800 |
| H | 3.50367300  | 0.49890500  | 2.22864500  |
| H | 5.36788800  | -0.97706600 | 1.59839600  |
| H | 4.43379000  | -0.35917900 | -2.56914800 |
| H | 2.56188700  | 1.13403500  | -1.91745900 |
| H | -2.75877300 | 0.71279000  | -0.76104400 |
| H | -3.74141700 | -0.81473900 | -2.13940300 |
| H | -5.67267300 | -2.31459700 | -2.51568000 |

|   |             |             |             |
|---|-------------|-------------|-------------|
| H | -6.62328700 | -2.13775300 | 1.67598300  |
| H | -4.69796600 | -0.63282400 | 2.06042100  |
| C | 6.12727400  | -1.64987300 | -1.01066200 |
| O | 6.35543800  | -1.88686800 | -2.18088600 |
| H | 0.24813600  | 3.71772000  | 0.87587600  |
| H | -1.42181000 | 2.05665900  | -1.04290400 |

## 2-conf28

|   |             |             |             |
|---|-------------|-------------|-------------|
| C | 3.45877600  | -2.70513200 | -3.15459000 |
| C | 2.08915400  | -2.06748600 | -2.87682200 |
| C | 1.69665900  | -2.22853400 | -1.41009600 |
| C | 2.75662200  | -1.62941500 | -0.47790800 |
| C | 4.12393300  | -2.29048100 | -0.74754600 |
| C | 4.53427700  | -2.13892400 | -2.21867800 |
| N | 2.32952600  | -1.81293700 | 0.92381200  |
| O | 0.42476200  | -1.53973200 | -1.22805200 |
| H | 1.78811400  | -2.65311100 | 1.10133300  |
| C | -0.51085500 | -2.10290400 | -0.44713000 |
| O | -0.33573400 | -3.12376900 | 0.20022400  |
| C | -1.79479700 | -1.33770900 | -0.45033700 |
| C | -2.82820600 | -1.78318700 | 0.38285500  |
| C | -4.04376900 | -1.10721800 | 0.41554900  |
| C | -4.23683200 | 0.02778300  | -0.39185200 |
| C | -3.19569600 | 0.47058800  | -1.22797800 |
| C | -1.98298100 | -0.20501300 | -1.25807600 |
| C | 2.92950900  | -1.32633900 | 2.02797700  |
| N | 3.62645500  | -0.13609700 | 1.93494600  |
| S | 2.88200400  | -2.14653700 | 3.51003400  |
| C | 3.29138000  | 1.05189900  | 1.26851900  |
| C | 4.28098600  | 2.05151200  | 1.19096200  |
| C | 4.00400900  | 3.26971100  | 0.59252900  |
| C | 2.72859900  | 3.49176400  | 0.06242300  |
| C | 1.73071200  | 2.51677100  | 0.13735400  |
| C | 2.01016200  | 1.29961900  | 0.74249000  |
| F | -7.07837300 | -0.90971000 | 0.19334100  |
| C | -6.68372100 | 0.34894600  | 0.49523200  |
| F | -7.74165500 | 1.15486500  | 0.34876300  |
| F | -6.32856700 | 0.36694800  | 1.80076000  |
| N | 2.43359600  | 4.76332000  | -0.57193400 |
| O | 1.30493400  | 4.93778800  | -1.04717900 |
| O | 3.32319600  | 5.62193600  | -0.61179500 |
| H | 3.73194200  | -2.53535800 | -4.20118700 |
| H | 3.39040400  | -3.79264900 | -3.01796200 |
| H | 2.11691300  | -0.99788500 | -3.11999100 |
| H | 1.31297000  | -2.52332100 | -3.49947600 |
| H | 4.06128100  | -3.35393800 | -0.48290300 |
| H | 4.87184700  | -1.83838300 | -0.08866800 |
| H | 5.49046500  | -2.64644500 | -2.38445000 |
| H | 4.69649900  | -1.07657700 | -2.44523600 |
| H | -2.67166000 | -2.65848400 | 1.00211000  |
| H | -4.82578300 | -1.47199500 | 1.06907300  |
| H | -3.35204800 | 1.34514300  | -1.84867500 |
| H | -1.18477000 | 0.13854400  | -1.90416600 |
| H | 4.29090800  | -0.02043500 | 2.69063300  |
| H | 5.26825000  | 1.86266200  | 1.59927300  |
| H | 4.76266600  | 4.03864000  | 0.52582700  |
| H | 0.74521900  | 2.71701100  | -0.26285400 |

|   |             |             |             |
|---|-------------|-------------|-------------|
| H | 1.23095500  | 0.55248200  | 0.82151800  |
| C | -5.50081700 | 0.80251200  | -0.41664400 |
| O | -5.68407200 | 1.78402500  | -1.10999100 |
| H | 1.54279900  | -3.28401500 | -1.16790700 |
| H | 2.82396500  | -0.56077900 | -0.69545900 |

**Annex III:** XYZ cartesian coordinates of the optimized energies of several **1-GHB** geometries bearing different hydrogen bonding modes between the thiourea and carboxylate moieties.

**1-GHB-a**

|   |             |             |             |
|---|-------------|-------------|-------------|
| C | 0.48976600  | 4.21120700  | -0.55083100 |
| C | 1.11882300  | 3.73960200  | 0.76160400  |
| N | 1.61319800  | 2.37104200  | 0.72743800  |
| O | -0.56928100 | 3.31199700  | -0.95504000 |
| H | 0.98517200  | 1.64987800  | 1.13560800  |
| C | -1.77316500 | 3.44426300  | -0.37061600 |
| O | -2.09023300 | 4.39564200  | 0.32553100  |
| C | -2.62703600 | 2.24609000  | -0.60477500 |
| C | -3.67344100 | 1.99353300  | 0.29100200  |
| C | -4.33620100 | 0.77071400  | 0.26574900  |
| C | -3.98806400 | -0.20642100 | -0.67954000 |
| C | -3.00768900 | 0.09091400  | -1.63416300 |
| C | -2.31930300 | 1.30121700  | -1.58970900 |
| C | 2.80878100  | 1.99931100  | 0.23599300  |
| N | 2.99572300  | 0.63355900  | 0.26833000  |
| S | 3.92456900  | 3.12298000  | -0.40384700 |
| C | 4.13049000  | -0.13603100 | 0.03978100  |
| C | 3.90997500  | -1.50606200 | -0.24576100 |
| C | 4.96920700  | -2.37026500 | -0.45525900 |
| C | 6.27877600  | -1.87839400 | -0.37729500 |
| C | 6.52275500  | -0.53408900 | -0.07597800 |
| C | 5.45976300  | 0.33129600  | 0.13428500  |
| F | -6.58816300 | -1.10113700 | 0.62068800  |
| C | -6.06678400 | -1.73411300 | -0.45073100 |
| F | -6.47974600 | -3.01414500 | -0.39048400 |
| F | -6.62271900 | -1.18230300 | -1.55733900 |
| N | 7.38988700  | -2.77162100 | -0.60133500 |
| O | 8.54201900  | -2.31592800 | -0.54428400 |
| O | 7.15445900  | -3.96522200 | -0.84274500 |
| H | -3.91611900 | 2.73031600  | 1.04855200  |
| H | -5.08545100 | 0.56561400  | 1.01944900  |
| H | -2.71931600 | -0.64566100 | -2.37458900 |
| H | -1.51584800 | 1.48939400  | -2.29151000 |
| H | 2.14373300  | 0.05897600  | 0.46429600  |
| H | 2.89196800  | -1.87517400 | -0.29386500 |
| H | 4.79384800  | -3.41388000 | -0.68287200 |
| H | 7.54130800  | -0.17586500 | 0.00337400  |
| H | 5.65086200  | 1.36626600  | 0.37309200  |
| C | -4.51182600 | -1.64525700 | -0.54022700 |
| O | -4.06588700 | -2.23469800 | 0.64167600  |
| H | 1.20950900  | 4.17574700  | -1.36724500 |
| H | 0.37670600  | 3.78873900  | 1.56218900  |
| O | -4.12463100 | -2.47027500 | -1.61905000 |
| C | -2.62794400 | -2.30477600 | 0.84859500  |
| H | -2.35127700 | -3.36250100 | 0.79895100  |

|   |             |             |             |
|---|-------------|-------------|-------------|
| H | -2.10817100 | -1.78356600 | 0.04225900  |
| C | -2.27664500 | -1.70994100 | 2.20739700  |
| H | -2.79959100 | -2.27945600 | 2.98425000  |
| H | -2.64026000 | -0.67897500 | 2.26069900  |
| C | -0.76133700 | -1.73892500 | 2.48732900  |
| H | -0.35655400 | -2.73489100 | 2.28116000  |
| H | -0.60644600 | -1.53345300 | 3.55235900  |
| C | 0.04895600  | -0.69276900 | 1.70425500  |
| O | -0.16105800 | 0.52935300  | 1.96335200  |
| O | 0.90038900  | -1.10828200 | 0.85742500  |
| H | -4.38992800 | -2.07661200 | -2.46406000 |
| H | 0.09793900  | 5.22416700  | -0.43840900 |
| H | 1.93543500  | 4.42332900  | 1.00950000  |

### 1-GHB-b

|   |             |             |             |
|---|-------------|-------------|-------------|
| C | -0.70378900 | 3.29997500  | 1.27740000  |
| C | 0.26983600  | 3.11698300  | 0.11239100  |
| H | -0.28661200 | 2.88669900  | -0.80710200 |
| N | 1.18020700  | 2.02949800  | 0.43297400  |
| H | -1.11583100 | 2.34428400  | 1.59621300  |
| O | -1.75437000 | 4.22977500  | 0.91086700  |
| H | 0.81333800  | 1.28704900  | 1.06561400  |
| C | -2.81917100 | 3.89064700  | 0.15123700  |
| O | -3.47831100 | 4.78634100  | -0.34581600 |
| C | -3.16698700 | 2.44630900  | -0.04574500 |
| C | -3.37696500 | 1.98349500  | -1.35014300 |
| C | -3.69069600 | 0.64332100  | -1.57823700 |
| C | -3.79345600 | -0.25000800 | -0.50624100 |
| C | -3.64428400 | 0.23061600  | 0.80087900  |
| C | -3.33615700 | 1.56720000  | 1.03289500  |
| C | 2.36207200  | 1.82207400  | -0.17305600 |
| N | 2.88265800  | 0.57635700  | 0.11801400  |
| S | 3.06831400  | 2.94700100  | -1.24158400 |
| C | 4.16823900  | 0.08193400  | -0.03448600 |
| C | 4.30601700  | -1.32755100 | -0.05088300 |
| C | 5.55133000  | -1.91970000 | -0.15665000 |
| C | 6.68951700  | -1.10694800 | -0.24403300 |
| C | 6.57984200  | 0.28842000  | -0.21062100 |
| C | 5.33114500  | 0.88037200  | -0.10460900 |
| F | -5.82815800 | -1.88560800 | 0.90768000  |
| C | -5.53898900 | -2.10311100 | -0.39195400 |
| F | -5.80660300 | -3.39787500 | -0.65240300 |
| F | -6.39289800 | -1.35843100 | -1.12678200 |
| N | 7.99153800  | -1.71597900 | -0.36223600 |
| O | 8.98718300  | -0.98173000 | -0.45425700 |
| O | 8.07179500  | -2.95393200 | -0.36723600 |
| H | -3.28150400 | 2.66698100  | -2.18696600 |
| H | -3.85178500 | 0.30672800  | -2.59641400 |
| H | -3.74758200 | -0.44677000 | 1.63938400  |
| H | -3.22937500 | 1.91790500  | 2.05373200  |
| H | 2.17649400  | -0.14016800 | 0.41346900  |
| H | 3.41621400  | -1.94355700 | 0.01979300  |
| H | 5.65098300  | -2.99731800 | -0.17875200 |
| H | 7.47204000  | 0.89982000  | -0.25696800 |
| H | 5.24942000  | 1.95670900  | -0.07184900 |
| O | -3.91962700 | -2.14335100 | -2.05853200 |

|   |             |             |             |
|---|-------------|-------------|-------------|
| H | -3.11043100 | -1.76986700 | -2.43623300 |
| C | -4.06041500 | -1.74553400 | -0.72125900 |
| O | -3.30952300 | -2.53104100 | 0.17549700  |
| C | -1.91848400 | -2.72134600 | -0.17926500 |
| H | -1.86774000 | -3.45379000 | -0.99125900 |
| H | -1.49275500 | -1.77479500 | -0.53507700 |
| C | -1.15326600 | -3.22269100 | 1.03820600  |
| H | -0.21462900 | -3.65398700 | 0.67664200  |
| H | -1.72542400 | -4.03663100 | 1.49879100  |
| C | -0.83668900 | -2.14597900 | 2.08225700  |
| H | -0.37686400 | -2.62269000 | 2.95835300  |
| H | -1.74761700 | -1.65938500 | 2.44112500  |
| C | 0.14362400  | -1.06202400 | 1.60971100  |
| O | 0.02504400  | 0.09712800  | 2.10967300  |
| O | 1.03398500  | -1.38484200 | 0.76432200  |
| H | -0.21255500 | 3.76995000  | 2.13011200  |
| H | 0.83424500  | 4.03340800  | -0.06789700 |

### 1-GHB-c

|   |             |             |             |
|---|-------------|-------------|-------------|
| C | 0.68168600  | 2.67032600  | 0.50722500  |
| C | -0.75529300 | 3.03041000  | 0.15466500  |
| H | -1.15093200 | 3.76722600  | 0.86089900  |
| N | -1.54959600 | 1.81065500  | 0.19530100  |
| H | 0.75355700  | 2.29606200  | 1.53088600  |
| O | 1.46545200  | 3.88553900  | 0.39734300  |
| H | -1.04417200 | 0.91894100  | 0.38061500  |
| C | 2.76869800  | 3.86204100  | 0.04277600  |
| O | 3.32427300  | 4.91493900  | -0.21073100 |
| C | 3.44963500  | 2.53025200  | -0.03460800 |
| C | 3.52249300  | 1.68771200  | 1.08256100  |
| C | 4.04800400  | 0.40689500  | 0.95257600  |
| C | 4.49351500  | -0.05175600 | -0.29396600 |
| C | 4.48948400  | 0.81535100  | -1.39002700 |
| C | 3.97585700  | 2.10687100  | -1.25964000 |
| C | -2.86833200 | 1.77527000  | -0.05853400 |
| N | -3.36465600 | 0.48859200  | -0.11013700 |
| S | -3.76980900 | 3.19131900  | -0.35699400 |
| C | -4.66985700 | 0.02005300  | -0.08386700 |
| C | -4.86621500 | -1.31488700 | -0.51718000 |
| C | -6.12188200 | -1.89342200 | -0.49630700 |
| C | -7.21285500 | -1.14477900 | -0.03440000 |
| C | -7.04082800 | 0.16920300  | 0.41622300  |
| C | -5.78164100 | 0.74846300  | 0.39476100  |
| F | 7.21745800  | -1.01377900 | -0.20012200 |
| C | 6.24435700  | -1.82629100 | 0.26238600  |
| F | 6.63509400  | -3.09921300 | 0.01288300  |
| F | 6.19355300  | -1.67735100 | 1.60064400  |
| N | -8.52690800 | -1.73819100 | -0.01521400 |
| O | -9.48450800 | -1.05477600 | 0.37870600  |
| O | -8.65550700 | -2.91306600 | -0.39265500 |
| H | 3.14444900  | 2.01474800  | 2.04551600  |
| H | 4.06032500  | -0.25388300 | 1.81131600  |
| H | 4.84900700  | 0.47219400  | -2.35211400 |
| H | 3.94112300  | 2.76562400  | -2.12106400 |
| H | -2.64817000 | -0.26627100 | -0.23699400 |
| H | -4.01181800 | -1.88454800 | -0.86541000 |

|   |             |             |             |
|---|-------------|-------------|-------------|
| H | -6.26692800 | -2.91057500 | -0.83701800 |
| H | -7.89087200 | 0.72585500  | 0.78994200  |
| H | -5.65158100 | 1.76039400  | 0.74764000  |
| C | 4.88526600  | -1.52189900 | -0.43833500 |
| O | 5.03422200  | -1.81062700 | -1.80324000 |
| H | 5.22910800  | -2.75561300 | -1.90248800 |
| O | 3.97769700  | -2.37587700 | 0.20515300  |
| C | 2.61656600  | -2.36057400 | -0.29966400 |
| H | 2.34939400  | -1.34677500 | -0.60987300 |
| H | 2.56052800  | -3.01969600 | -1.17307400 |
| C | 1.69355800  | -2.84094800 | 0.80952000  |
| H | 1.78700200  | -2.17003200 | 1.66885600  |
| H | 2.01861200  | -3.83741000 | 1.13117400  |
| C | 0.22821200  | -2.90897400 | 0.36441800  |
| H | -0.34738600 | -3.46492400 | 1.11562700  |
| H | 0.12580400  | -3.48052200 | -0.56527800 |
| C | -0.50635800 | -1.57084400 | 0.18287000  |
| O | -1.60008200 | -1.61431600 | -0.46439100 |
| O | -0.02815100 | -0.52288200 | 0.70488700  |
| H | -0.79297800 | 3.48032400  | -0.84427500 |
| H | 1.06445400  | 1.91114800  | -0.17457300 |

#### 1-GHB-d

|   |             |             |             |
|---|-------------|-------------|-------------|
| C | -0.58455500 | 2.85295000  | 0.36990400  |
| C | 0.74155000  | 3.13795500  | -0.32911900 |
| H | 0.56109100  | 3.37530900  | -1.38583100 |
| N | 1.57247600  | 1.95458400  | -0.19243300 |
| H | -1.03632400 | 1.94241400  | -0.02671100 |
| O | -1.45770500 | 3.98273700  | 0.13701600  |
| H | 1.10112500  | 1.04300400  | -0.20913900 |
| C | -2.78182100 | 3.84818300  | -0.09218100 |
| O | -3.40272400 | 4.81782800  | -0.48756200 |
| C | -3.42686500 | 2.51648600  | 0.14170800  |
| C | -4.17268600 | 1.94319600  | -0.89241700 |
| C | -4.74190500 | 0.67845800  | -0.73221200 |
| C | -4.59272100 | -0.01512000 | 0.47392200  |
| C | -3.89831200 | 0.59279200  | 1.52988100  |
| C | -3.31326600 | 1.84349500  | 1.36642000  |
| C | 2.92377000  | 1.93417200  | -0.17071000 |
| N | 3.40359600  | 0.64812200  | -0.06370400 |
| S | 3.85641200  | 3.35166100  | -0.29054600 |
| C | 4.68425400  | 0.11486500  | 0.01131400  |
| C | 4.75663200  | -1.29718600 | -0.09991100 |
| C | 5.97090600  | -1.95257200 | -0.01938900 |
| C | 7.14160600  | -1.20605800 | 0.17506600  |
| C | 7.09212800  | 0.18623600  | 0.29218200  |
| C | 5.87403300  | 0.84669100  | 0.21370400  |
| F | -7.23875100 | -1.09597000 | -0.26823500 |
| C | -6.18027400 | -1.93421600 | -0.27349100 |
| F | -6.62930400 | -3.15106600 | 0.10711000  |
| F | -5.76550700 | -2.05419300 | -1.55640900 |
| N | 8.41362600  | -1.88337600 | 0.25859900  |
| O | 9.43993700  | -1.20687800 | 0.42339500  |
| O | 8.43620900  | -3.11964400 | 0.16304700  |
| H | -4.28549700 | 2.46943500  | -1.83412700 |
| H | -5.28477500 | 0.24906500  | -1.56500800 |

|   |             |             |             |
|---|-------------|-------------|-------------|
| H | -3.80185700 | 0.07298000  | 2.47541400  |
| H | -2.76600300 | 2.28704700  | 2.19143700  |
| H | 2.64918600  | -0.06960700 | -0.05331800 |
| H | 3.84220000  | -1.86601500 | -0.25823800 |
| H | 6.02297700  | -3.03013700 | -0.10958900 |
| H | 8.00493900  | 0.74639800  | 0.45075000  |
| H | 5.83478500  | 1.92115300  | 0.30686800  |
| C | -5.05061200 | -1.45631000 | 0.69520700  |
| O | -5.57491100 | -1.54564200 | 1.98865200  |
| H | -5.62282000 | -2.48430200 | 2.23098400  |
| O | -3.98954500 | -2.38742900 | 0.63171600  |
| C | -3.03741400 | -2.36174700 | -0.46481000 |
| H | -3.14917300 | -3.30946700 | -1.00127400 |
| H | -3.27500200 | -1.55153800 | -1.15763500 |
| C | -1.62375000 | -2.19479900 | 0.07794200  |
| H | -1.54624500 | -1.23285700 | 0.59383700  |
| H | -1.42745700 | -2.98104300 | 0.81717500  |
| C | -0.58263700 | -2.26180200 | -1.05164600 |
| H | -0.83957600 | -1.52231400 | -1.82218800 |
| H | -0.59435600 | -3.24925900 | -1.52249100 |
| C | 0.84615500  | -1.95395300 | -0.57910300 |
| O | 1.03680200  | -0.80149700 | -0.05305800 |
| O | 1.73803200  | -2.82241400 | -0.73532700 |
| H | -0.43758000 | 2.74122200  | 1.44696000  |
| H | 1.24788800  | 3.99091300  | 0.12481600  |

### 1-GHB-e

|   |             |             |             |
|---|-------------|-------------|-------------|
| C | -0.60392100 | 3.35320500  | 1.27459200  |
| C | 0.22873800  | 3.02622200  | 0.03443800  |
| H | -0.42847300 | 2.71205100  | -0.78903800 |
| N | 1.16043500  | 1.96801400  | 0.38133200  |
| H | -0.99696700 | 2.44754100  | 1.73458700  |
| O | -1.67635600 | 4.27596800  | 0.95971000  |
| H | 0.83106600  | 1.26686500  | 1.05150500  |
| C | -2.79904000 | 3.93387400  | 0.29176300  |
| O | -3.51079000 | 4.83100200  | -0.12399700 |
| C | -3.14494500 | 2.49097200  | 0.07524000  |
| C | -3.48878500 | 2.08826000  | -1.22128100 |
| C | -3.81826500 | 0.75853300  | -1.48177600 |
| C | -3.80200500 | -0.18802800 | -0.45121000 |
| C | -3.51414700 | 0.22940300  | 0.85427500  |
| C | -3.19355000 | 1.55752900  | 1.11982800  |
| C | 2.28770200  | 1.63985500  | -0.29976700 |
| N | 2.77006300  | 0.41715200  | 0.04085200  |
| S | 2.90253600  | 2.67101300  | -1.53802600 |
| C | 4.07509700  | 0.02311500  | -0.06792800 |
| C | 4.34309100  | -1.37039300 | -0.19450400 |
| C | 5.63368600  | -1.85837500 | -0.24273800 |
| C | 6.71559600  | -0.96578100 | -0.15321000 |
| C | 6.48737900  | 0.41392800  | -0.00546300 |
| C | 5.19483200  | 0.89812600  | 0.03430900  |
| F | -5.67332600 | -1.89911700 | 1.09495200  |
| C | -5.53100200 | -2.04824600 | -0.23819100 |
| F | -5.82980100 | -3.32829300 | -0.53433500 |
| F | -6.45754100 | -1.26811900 | -0.83445800 |
| N | 8.05325500  | -1.46371600 | -0.20480700 |

|   |             |             |             |
|---|-------------|-------------|-------------|
| O | 9.00160900  | -0.65765700 | -0.14042800 |
| O | 8.23771200  | -2.69169600 | -0.31247500 |
| H | -3.48867800 | 2.81342800  | -2.02774100 |
| H | -4.08948400 | 0.47416700  | -2.49249200 |
| H | -3.52605000 | -0.48813000 | 1.66543700  |
| H | -2.99381300 | 1.85719800  | 2.14249100  |
| H | 1.76429500  | -0.65338300 | 0.40073800  |
| H | 3.50808700  | -2.05869700 | -0.26471200 |
| H | 5.81984100  | -2.91910000 | -0.35479300 |
| H | 7.32991500  | 1.08815500  | 0.08669900  |
| H | 5.02696500  | 1.95944900  | 0.15803300  |
| O | -4.10371200 | -2.00255700 | -2.07274400 |
| H | -3.36202200 | -1.58003500 | -2.52887400 |
| C | -4.09642100 | -1.67103300 | -0.71111800 |
| O | -3.25650900 | -2.50311400 | 0.05715800  |
| C | -1.90857900 | -2.65527700 | -0.44045600 |
| H | -1.93512400 | -3.27256600 | -1.34382800 |
| H | -1.49578100 | -1.67240200 | -0.70223100 |
| C | -1.06076300 | -3.33163500 | 0.62794000  |
| H | -0.14416400 | -3.68490600 | 0.14641000  |
| H | -1.59422400 | -4.21786300 | 0.98838100  |
| C | -0.69798200 | -2.44083200 | 1.82397900  |
| H | -0.15654400 | -3.04298500 | 2.56528100  |
| H | -1.58984800 | -2.05715200 | 2.32459400  |
| C | 0.19729500  | -1.25626100 | 1.50316400  |
| O | 0.08915900  | -0.17726400 | 2.09651100  |
| O | 1.09918900  | -1.48112000 | 0.57208800  |
| H | -0.00587300 | 3.88474400  | 2.01548500  |
| H | 0.77956600  | 3.90556700  | -0.30250200 |

### 1-GHB-f

|   |             |             |             |
|---|-------------|-------------|-------------|
| C | 0.48068600  | 4.18619200  | -0.48268200 |
| C | 1.16419500  | 3.67142200  | 0.78604400  |
| N | 1.63279000  | 2.29948700  | 0.70416300  |
| O | -0.62459000 | 3.32531400  | -0.85352100 |
| H | 0.98510700  | 1.57130300  | 1.00721200  |
| C | -1.78464200 | 3.45817700  | -0.18860900 |
| O | -2.02873200 | 4.37421200  | 0.58089700  |
| C | -2.69079500 | 2.30187100  | -0.43998800 |
| C | -3.64605800 | 1.98605600  | 0.53408600  |
| C | -4.34546700 | 0.78529400  | 0.46502300  |
| C | -4.13171900 | -0.10055000 | -0.60220500 |
| C | -3.24665300 | 0.26705000  | -1.62335300 |
| C | -2.51657200 | 1.45065400  | -1.53642800 |
| C | 2.81758200  | 1.87871900  | 0.18474900  |
| N | 2.94968500  | 0.53774000  | 0.14411000  |
| S | 3.94866800  | 3.04078500  | -0.43419000 |
| C | 4.13871900  | -0.12704700 | -0.03595700 |
| C | 4.10382700  | -1.36568000 | -0.73359800 |
| C | 5.23630200  | -2.14164400 | -0.89459800 |
| C | 6.45209800  | -1.70680000 | -0.34309400 |
| C | 6.51929400  | -0.49928700 | 0.37298200  |
| C | 5.38472600  | 0.27585200  | 0.52089600  |
| F | -6.60986200 | -1.05930800 | 0.88064400  |
| C | -6.22749700 | -1.59214500 | -0.29821500 |
| F | -6.67651500 | -2.86101800 | -0.32042200 |



|   |             |             |             |
|---|-------------|-------------|-------------|
| F | -6.87603500 | -0.91686400 | -1.27865400 |
| N | 7.63040500  | -2.50377400 | -0.50465100 |
| O | 8.70481400  | -2.09563800 | -0.02580100 |
| O | 7.54877400  | -3.58383600 | -1.11884000 |
| H | -3.78664700 | 2.65151600  | 1.37858900  |
| H | -5.01773700 | 0.52407000  | 1.27208700  |
| H | -3.06416500 | -0.39868000 | -2.45854200 |
| H | -1.78440800 | 1.68905800  | -2.29859300 |
| H | 1.82148900  | -0.53908000 | 0.57895800  |
| H | 3.16205000  | -1.69420900 | -1.15958700 |
| H | 5.19683700  | -3.07323700 | -1.44497500 |
| H | 7.45879200  | -0.19044600 | 0.81433100  |
| H | 5.43801000  | 1.19823200  | 1.08297100  |
| C | -4.68894500 | -1.53272100 | -0.54767500 |
| O | -4.13915400 | -2.24545500 | 0.51897800  |
| H | 1.15735200  | 4.14558500  | -1.33520100 |
| H | 0.46467600  | 3.72777100  | 1.62442700  |
| O | -4.44653200 | -2.25680200 | -1.73445400 |
| C | -2.69820300 | -2.41308500 | 0.52116200  |
| H | -2.48403100 | -3.43918000 | 0.20594100  |
| H | -2.24240200 | -1.73402500 | -0.20301200 |
| C | -2.16464400 | -2.14515600 | 1.92357700  |
| H | -2.60817000 | -2.86475300 | 2.61931700  |
| H | -2.47016900 | -1.14512100 | 2.24497500  |
| C | -0.63467000 | -2.26059000 | 1.98672000  |
| H | -0.27650500 | -3.16402200 | 1.48437500  |
| H | -0.32243600 | -2.34784200 | 3.03518400  |
| C | 0.11785300  | -1.05811900 | 1.43964000  |
| O | -0.27873300 | 0.10071100  | 1.56454300  |
| O | 1.26327100  | -1.37357100 | 0.86130000  |
| H | -4.79233000 | -1.77964900 | -2.50387100 |
| H | 0.12153000  | 5.20698100  | -0.33447200 |
| H | 2.00658100  | 4.33344300  | 1.00179400  |

### 1-GHB-g

|   |             |             |             |
|---|-------------|-------------|-------------|
| C | -0.63865200 | 2.71793800  | -0.59714500 |
| C | 0.77713800  | 3.05028000  | -0.14341200 |
| H | 1.21290200  | 3.82724200  | -0.78039200 |
| N | 1.55642600  | 1.82470400  | -0.21653700 |
| H | -0.65141200 | 2.39387600  | -1.64115100 |
| O | -1.43699900 | 3.92134900  | -0.48259100 |
| H | 1.07190000  | 0.96924400  | -0.50152600 |
| C | -2.74142600 | 3.88933200  | -0.13298300 |
| O | -3.30467900 | 4.94030900  | 0.11193300  |
| C | -3.41780200 | 2.55557500  | -0.04397600 |
| C | -3.46614500 | 1.68604800  | -1.14187100 |
| C | -3.99516300 | 0.40842100  | -0.99338200 |
| C | -4.47067200 | -0.01980400 | 0.25315400  |
| C | -4.48976000 | 0.87328700  | 1.32799100  |
| C | -3.97189000 | 2.16090900  | 1.17839000  |
| C | 2.83726400  | 1.67765800  | 0.19868200  |
| N | 3.25123500  | 0.38583300  | 0.22172900  |
| S | 3.72737700  | 3.05412400  | 0.74102400  |
| C | 4.55542800  | -0.02106300 | 0.14481600  |
| C | 4.89606100  | -1.28016600 | 0.71847500  |
| C | 6.17231400  | -1.79873700 | 0.62569700  |

|   |             |             |             |
|---|-------------|-------------|-------------|
| C | 7.16442600  | -1.07823600 | -0.06119600 |
| C | 6.85843500  | 0.15813100  | -0.65777100 |
| C | 5.58279500  | 0.67630100  | -0.55472500 |
| F | -7.18736900 | -0.98826900 | 0.07377700  |
| C | -6.19666300 | -1.81522700 | -0.31979000 |
| F | -6.59715200 | -3.07920500 | -0.04224400 |
| F | -6.08992200 | -1.71302200 | -1.65888000 |
| N | 8.48660500  | -1.60784200 | -0.16096600 |
| O | 9.36046900  | -0.94549200 | -0.75382700 |
| O | 8.73333500  | -2.71956100 | 0.34629800  |
| H | -3.06590800 | 1.98962600  | -2.10349600 |
| H | -3.98797700 | -0.27215000 | -1.83667300 |
| H | -4.87188100 | 0.55390900  | 2.28947200  |
| H | -3.95683100 | 2.84026500  | 2.02416300  |
| H | 2.22837100  | -0.76691700 | 0.37256200  |
| H | 4.13114300  | -1.83471600 | 1.25037400  |
| H | 6.41723200  | -2.74950200 | 1.08227500  |
| H | 7.62550100  | 0.69127900  | -1.20579000 |
| H | 5.35299100  | 1.62231800  | -1.02577900 |
| C | -4.86830700 | -1.48523200 | 0.42682800  |
| O | -5.07238600 | -1.73246200 | 1.79174600  |
| H | -5.27862000 | -2.67261800 | 1.91202300  |
| O | -3.93341600 | -2.35945500 | -0.15170300 |
| C | -2.59727400 | -2.32023800 | 0.40552300  |
| H | -2.30401500 | -1.28178800 | 0.58472800  |
| H | -2.59410500 | -2.85404800 | 1.36202700  |
| C | -1.65579100 | -2.98009200 | -0.59136100 |
| H | -1.71944600 | -2.45569400 | -1.54966000 |
| H | -1.98043200 | -4.01246600 | -0.75890000 |
| C | -0.20360800 | -2.99196900 | -0.10280700 |
| H | 0.38848500  | -3.67583800 | -0.72369500 |
| H | -0.12343100 | -3.38030000 | 0.91865200  |
| C | 0.51402900  | -1.65411600 | -0.15990400 |
| O | 1.64727300  | -1.64648000 | 0.51351800  |
| O | 0.09470400  | -0.68464700 | -0.79700400 |
| H | 0.75875200  | 3.43791700  | 0.88164100  |
| H | -1.05593200 | 1.92746800  | 0.02695100  |

**Annex IV:** XYZ cartesian coordinates of the optimized energies of several **2-GHB** geometries bearing different hydrogen bonding modes between the thiourea and carboxylate moieties.

#### **2-GHB-a**

|   |             |            |             |
|---|-------------|------------|-------------|
| C | 2.14939500  | 6.07075800 | -0.56496500 |
| C | 0.86711500  | 5.32244200 | -0.95876400 |
| C | 1.07524000  | 3.80968300 | -0.84480100 |
| C | 1.58089000  | 3.36633700 | 0.54467200  |
| C | 2.81482900  | 4.18419300 | 0.98322100  |
| C | 2.57396900  | 5.69462000 | 0.86060800  |
| N | 1.78359600  | 1.91065800 | 0.65668500  |
| O | -0.10544900 | 3.02592800 | -1.22054100 |
| H | 1.15933800  | 1.44754200 | 1.34323000  |
| C | -1.24852000 | 3.09936000 | -0.52156700 |
| O | -1.52193800 | 3.98340500 | 0.27660900  |
| C | -2.13967900 | 1.92540300 | -0.76039900 |

|   |             |             |             |
|---|-------------|-------------|-------------|
| C | -3.35941700 | 1.87530400  | -0.07207300 |
| C | -4.10857600 | 0.70530500  | -0.05510500 |
| C | -3.65584000 | -0.43790600 | -0.73328300 |
| C | -2.48551800 | -0.35423300 | -1.49557500 |
| C | -1.72839300 | 0.81731400  | -1.50848300 |
| C | 2.63239900  | 1.11747700  | -0.02350800 |
| N | 2.46596000  | -0.21878600 | 0.28891300  |
| S | 3.73988100  | 1.65815300  | -1.20668800 |
| C | 3.30944700  | -1.29629100 | 0.05286900  |
| C | 2.70993400  | -2.57798600 | 0.00654700  |
| C | 3.47520800  | -3.71646500 | -0.17550300 |
| C | 4.86407800  | -3.59298500 | -0.30951500 |
| C | 5.48304300  | -2.33855800 | -0.24269000 |
| C | 4.71437000  | -1.20013600 | -0.06086300 |
| F | -6.55287800 | -0.94419100 | -0.00313800 |
| C | -5.84858000 | -1.81028800 | -0.76080900 |
| F | -6.37853000 | -3.03144300 | -0.55843400 |
| F | -6.06984200 | -1.48485400 | -2.05864400 |
| N | 5.66798600  | -4.77391600 | -0.50777100 |
| O | 6.89471600  | -4.64492200 | -0.64128900 |
| O | 5.10576400  | -5.87947000 | -0.53757400 |
| H | 1.97706700  | 7.14984800  | -0.64342800 |
| H | 2.95974800  | 5.82742500  | -1.26569100 |
| H | 0.04965600  | 5.63724900  | -0.30675600 |
| H | 0.57788900  | 5.55712800  | -1.98950600 |
| H | 3.67170900  | 3.89972500  | 0.36725900  |
| H | 3.05119800  | 3.91108300  | 2.01769500  |
| H | 3.48716600  | 6.23064800  | 1.14296700  |
| H | 1.79217200  | 6.00898100  | 1.56615100  |
| H | -3.68149100 | 2.73809300  | 0.49968300  |
| H | -5.01209600 | 0.66917300  | 0.53998500  |
| H | -2.11012500 | -1.22145700 | -2.02558900 |
| H | -0.79103600 | 0.84725500  | -2.05040400 |
| H | 1.54729700  | -0.49421100 | 0.71811900  |
| H | 1.63515300  | -2.65912000 | 0.12003200  |
| H | 3.01032700  | -4.69290100 | -0.22238800 |
| H | 6.56029700  | -2.26444600 | -0.32003500 |
| H | 5.19552500  | -0.23544400 | 0.00170700  |
| C | -4.31643800 | -1.80130100 | -0.46860600 |
| O | -4.21934900 | -2.16520100 | 0.87326900  |
| H | 1.79917600  | 3.49034700  | -1.59446500 |
| H | 0.78110700  | 3.57347300  | 1.26157500  |
| O | -3.75495500 | -2.83750900 | -1.24789600 |
| C | -2.88234600 | -2.20644200 | 1.45210800  |
| H | -2.72655400 | -3.23494600 | 1.79187300  |
| H | -2.13442200 | -1.98753300 | 0.69057700  |
| C | -2.79022200 | -1.22676700 | 2.61884700  |
| H | -3.50669100 | -1.53140600 | 3.39071500  |
| H | -3.09373300 | -0.23146900 | 2.27976200  |
| C | -1.38258500 | -1.14706400 | 3.25038000  |
| H | -1.03260300 | -2.15677600 | 3.49573400  |
| H | -1.45276300 | -0.57823800 | 4.18128100  |
| C | -0.34390700 | -0.47626100 | 2.34038600  |
| O | -0.05043700 | 0.73838700  | 2.54708800  |
| O | 0.16057700  | -1.18664900 | 1.41358900  |
| H | -3.79374700 | -2.61657800 | -2.19074100 |

## 2-GHB-b

|   |             |             |             |
|---|-------------|-------------|-------------|
| C | 0.02253200  | 0.00304900  | -0.00835500 |
| C | 0.01770700  | 0.01154100  | 1.52527200  |
| C | 1.41675700  | -0.00177400 | 2.14252000  |
| C | 2.39665300  | 1.02365300  | 1.52469800  |
| C | 2.31646900  | 1.05291300  | -0.01485100 |
| C | 0.88281600  | 1.15167900  | -0.54821200 |
| H | 3.41284900  | 0.73629400  | 1.81388400  |
| N | 2.12399000  | 2.32668900  | 2.14978800  |
| H | 1.35054900  | 0.19214200  | 3.21086800  |
| O | 2.00123400  | -1.32757500 | 1.93203300  |
| H | 1.24939200  | 2.42122200  | 2.69934900  |
| C | 2.51079300  | -2.08961800 | 2.91940400  |
| O | 3.21882800  | -3.03560400 | 2.61704700  |
| C | 2.18763200  | -1.76654500 | 4.34771700  |
| C | 3.23499500  | -1.69919400 | 5.27253300  |
| C | 2.97882200  | -1.35195200 | 6.60046800  |
| C | 1.67501400  | -1.06306600 | 7.01602000  |
| C | 0.62056700  | -1.20149200 | 6.10350800  |
| C | 0.87173100  | -1.55212000 | 4.78223700  |
| C | 3.03654300  | 3.30648000  | 2.28199900  |
| N | 2.62125000  | 4.30761000  | 3.14213000  |
| S | 4.57493000  | 3.26113700  | 1.55060400  |
| C | 3.05947400  | 5.61681200  | 3.24620700  |
| C | 2.79820400  | 6.28485300  | 4.46761900  |
| C | 3.15498700  | 7.60945100  | 4.64412600  |
| C | 3.78011700  | 8.29665200  | 3.59484400  |
| C | 4.03110100  | 7.66257100  | 2.37103300  |
| C | 3.67361500  | 6.33601200  | 2.19594200  |
| F | -0.49343500 | -2.06361700 | 8.78568200  |
| C | 0.70101700  | -1.68897400 | 9.28872900  |
| F | 0.49408600  | -1.28867500 | 10.55863400 |
| F | 1.48381600  | -2.78850600 | 9.33404200  |
| N | 4.16128300  | 9.67453600  | 3.77377900  |
| O | 4.73215900  | 10.26208900 | 2.84143800  |
| O | 3.90542600  | 10.22875700 | 4.85442200  |
| H | -1.00729000 | 0.08497800  | -0.37337400 |
| H | 0.41468400  | -0.95339100 | -0.37794000 |
| H | -0.48229900 | 0.91609200  | 1.88872700  |
| H | -0.54942000 | -0.83821200 | 1.92123000  |
| H | 2.77424200  | 0.12500100  | -0.38158600 |
| H | 2.93545100  | 1.87593000  | -0.37955500 |
| H | 0.89908200  | 1.13707500  | -1.64386200 |
| H | 0.43969700  | 2.11274800  | -0.25282500 |
| H | 4.25192400  | -1.89587400 | 4.95060300  |
| H | 3.80624200  | -1.30210500 | 7.29962300  |
| H | -0.39654400 | -1.00621400 | 6.42001100  |
| H | 0.04131600  | -1.64116800 | 4.09058400  |
| H | 1.96541500  | 4.00738100  | 3.90695500  |
| H | 2.31095900  | 5.74121300  | 5.26942100  |
| H | 2.96253100  | 8.11286000  | 5.58291000  |
| H | 4.49359600  | 8.21536900  | 1.56323800  |
| H | 3.86130400  | 5.85259300  | 1.24826200  |
| O | 2.51011000  | -0.23679600 | 9.16937700  |
| H | 3.10689400  | 0.30535800  | 8.63392300  |
| C | 1.36261000  | -0.56897800 | 8.43446900  |

|   |             |            |            |
|---|-------------|------------|------------|
| O | 0.40060900  | 0.45995800 | 8.40838600 |
| C | 0.89662800  | 1.76213500 | 8.00826700 |
| H | 1.43357900  | 2.19835800 | 8.85684300 |
| H | 1.59451800  | 1.65282000 | 7.16998100 |
| C | -0.27753300 | 2.64705800 | 7.60803800 |
| H | 0.05841500  | 3.68603700 | 7.67930200 |
| H | -1.07543300 | 2.51779400 | 8.34901200 |
| C | -0.82557400 | 2.39605600 | 6.19955100 |
| H | -1.75208400 | 2.96952700 | 6.06395400 |
| H | -1.10458300 | 1.34673200 | 6.06211700 |
| C | 0.10505000  | 2.79859800 | 5.04327800 |
| O | -0.16438000 | 2.33678400 | 3.89492100 |
| O | 1.07275600  | 3.58268000 | 5.28940400 |

## 2-GHB-c

|   |             |             |             |
|---|-------------|-------------|-------------|
| C | -0.55231400 | 4.14767500  | 2.23738600  |
| C | -1.01563200 | 2.80369100  | 1.65863600  |
| C | -0.73814200 | 2.67016700  | 0.15812100  |
| C | 0.71452600  | 3.01511700  | -0.22950600 |
| C | 1.17653100  | 4.34401000  | 0.40180200  |
| C | 0.92570300  | 4.40338700  | 1.91370100  |
| H | 0.76289000  | 3.10110700  | -1.31877800 |
| N | 1.56107700  | 1.88258200  | 0.15792100  |
| H | -0.96535000 | 1.66079800  | -0.18518400 |
| O | -1.55854100 | 3.62236900  | -0.59434000 |
| H | 1.19437000  | 1.19427500  | 0.82068100  |
| C | -2.85882100 | 3.41275400  | -0.88333900 |
| O | -3.52589600 | 4.35181700  | -1.27968400 |
| C | -3.42762200 | 2.03620600  | -0.70947400 |
| C | -2.94793400 | 0.94979300  | -1.45346700 |
| C | -3.43623400 | -0.33013700 | -1.20800300 |
| C | -4.39436000 | -0.54340000 | -0.20795800 |
| C | -4.92326000 | 0.55066600  | 0.48195400  |
| C | -4.44948900 | 1.83802000  | 0.22475800  |
| C | 2.72944900  | 1.54736000  | -0.43414400 |
| N | 3.22441600  | 0.36302300  | 0.06432700  |
| S | 3.42983100  | 2.46726400  | -1.67993400 |
| C | 4.44579100  | -0.27306000 | -0.09156000 |
| C | 4.49466500  | -1.62822600 | 0.31883700  |
| C | 5.66861100  | -2.35433700 | 0.24902100  |
| C | 6.82711800  | -1.73282900 | -0.23578400 |
| C | 6.80760500  | -0.39219100 | -0.63562600 |
| C | 5.62916500  | 0.33524600  | -0.56450100 |
| F | -6.68803600 | -2.00011000 | -1.22505000 |
| C | -5.57266700 | -2.69745800 | -0.92322100 |
| F | -5.96850700 | -3.92304700 | -0.50368000 |
| F | -4.88101700 | -2.86993600 | -2.06688900 |
| N | 8.05674700  | -2.48371600 | -0.31673400 |
| O | 9.06781800  | -1.92466600 | -0.76738200 |
| O | 8.05989700  | -3.66258700 | 0.06856200  |
| H | -0.71706300 | 4.15078500  | 3.32025400  |
| H | -1.16379100 | 4.95830000  | 1.82120800  |
| H | -0.48974200 | 1.98417200  | 2.16644500  |
| H | -2.08157100 | 2.63720700  | 1.84502700  |
| H | 0.62705900  | 5.15414800  | -0.09334700 |

|   |             |             |             |
|---|-------------|-------------|-------------|
| H | 2.23493300  | 4.48842000  | 0.16938000  |
| H | 1.23609100  | 5.38092700  | 2.29904800  |
| H | 1.54725500  | 3.65374500  | 2.42201800  |
| H | -2.17800700 | 1.09396100  | -2.20466000 |
| H | -3.02537800 | -1.16934900 | -1.75714800 |
| H | -5.67665000 | 0.39634900  | 1.24412000  |
| H | -4.84668800 | 2.68041800  | 0.78157100  |
| H | 2.52732300  | -0.15989000 | 0.64052500  |
| H | 3.59223800  | -2.10098700 | 0.69126400  |
| H | 5.69630700  | -3.39127200 | 0.55804800  |
| H | 7.71621500  | 0.07678600  | -0.99149200 |
| H | 5.61681300  | 1.37019600  | -0.87092400 |
| C | -4.75065900 | -1.97630300 | 0.18764000  |
| O | -5.54743900 | -1.93302800 | 1.34297100  |
| H | -5.69948600 | -2.84162200 | 1.64628700  |
| O | -3.61706500 | -2.78939800 | 0.34745200  |
| C | -2.60944600 | -2.30787900 | 1.27209700  |
| H | -2.26837000 | -1.32242100 | 0.94313900  |
| H | -3.05214300 | -2.20903300 | 2.26914000  |
| C | -1.44349200 | -3.28527200 | 1.27640900  |
| H | -1.21405200 | -3.56675100 | 0.24479700  |
| H | -1.72072200 | -4.19506600 | 1.82033300  |
| C | -0.19716500 | -2.64683900 | 1.90355900  |
| H | 0.55071500  | -3.42595800 | 2.10104300  |
| H | -0.42502200 | -2.19541600 | 2.87573600  |
| C | 0.49780100  | -1.59552200 | 1.01507100  |
| O | 1.20234700  | -0.71180700 | 1.62527700  |
| O | 0.37994500  | -1.68011000 | -0.22936300 |

## 2-GHB-d

|   |             |             |             |
|---|-------------|-------------|-------------|
| C | -0.64443100 | 4.92280600  | 1.71963000  |
| C | -1.13952800 | 3.47298500  | 1.61079400  |
| C | -1.08016700 | 2.93050800  | 0.18210600  |
| C | 0.28454100  | 3.15229400  | -0.50821000 |
| C | 0.78397500  | 4.60105300  | -0.34559600 |
| C | 0.75813600  | 5.07506700  | 1.11391900  |
| H | 0.16622200  | 2.93204100  | -1.57162800 |
| N | 1.23059800  | 2.16985100  | 0.02238700  |
| H | -1.31682500 | 1.86592700  | 0.16386000  |
| O | -2.06301100 | 3.64762200  | -0.63093000 |
| H | 1.11981600  | 1.84435300  | 0.98752700  |
| C | -3.06111000 | 3.03535900  | -1.29535100 |
| O | -3.66526700 | 3.65822700  | -2.15012900 |
| C | -3.40871700 | 1.61820000  | -0.94249100 |
| C | -3.23399700 | 0.61035400  | -1.89418000 |
| C | -3.51969100 | -0.71820200 | -1.57148400 |
| C | -4.01087100 | -1.04804700 | -0.30384900 |
| C | -4.24355900 | -0.02320600 | 0.62468400  |
| C | -3.93552000 | 1.29766800  | 0.31640700  |
| C | 2.22156200  | 1.58304800  | -0.68749500 |
| N | 2.88448400  | 0.63714300  | 0.06431600  |
| S | 2.54502200  | 1.97765100  | -2.30936700 |
| C | 4.01294600  | -0.13744700 | -0.16227400 |
| C | 4.33065200  | -1.05981100 | 0.86728200  |
| C | 5.43356500  | -1.88623400 | 0.77386900  |
| C | 6.25224400  | -1.80454900 | -0.36083800 |

|   |             |             |             |
|---|-------------|-------------|-------------|
| C | 5.96593600  | -0.89749700 | -1.38539900 |
| C | 4.85681000  | -0.06896000 | -1.29214100 |
| F | -5.18943100 | -3.25868300 | -1.88937400 |
| C | -4.27715800 | -3.55478000 | -0.93836500 |
| F | -4.61801500 | -4.75484500 | -0.41812300 |
| F | -3.08479300 | -3.71904400 | -1.55799900 |
| N | 7.40507500  | -2.66611600 | -0.47158600 |
| O | 8.11749200  | -2.58080100 | -1.48283800 |
| O | 7.64258500  | -3.46177700 | 0.44935900  |
| H | -0.64322600 | 5.22585800  | 2.77217900  |
| H | -1.34291900 | 5.58960200  | 1.19857400  |
| H | -0.51681400 | 2.82368900  | 2.24034000  |
| H | -2.16266700 | 3.37489500  | 1.98800000  |
| H | 0.13697900  | 5.24734000  | -0.95154200 |
| H | 1.79090500  | 4.66995400  | -0.76797700 |
| H | 1.08234300  | 6.12025000  | 1.16657500  |
| H | 1.47861200  | 4.49440800  | 1.70605500  |
| H | -2.84762200 | 0.85222200  | -2.87864100 |
| H | -3.33784000 | -1.47879600 | -2.32025300 |
| H | -4.64769600 | -0.26732400 | 1.60010600  |
| H | -4.10042300 | 2.07248300  | 1.05796600  |
| H | 2.43958100  | 0.47492600  | 0.99178800  |
| H | 3.69467100  | -1.11265100 | 1.74477600  |
| H | 5.66634900  | -2.58849700 | 1.56391600  |
| H | 6.61272500  | -0.84263800 | -2.25188800 |
| H | 4.63398900  | 0.62696300  | -2.08602800 |
| C | -4.22888000 | -2.47734100 | 0.19130800  |
| O | -5.46760600 | -2.52052200 | 0.84154100  |
| H | -5.49900700 | -3.32770600 | 1.37998600  |
| O | -3.26345700 | -2.89493300 | 1.13563300  |
| C | -1.85626700 | -2.58904800 | 0.94120900  |
| H | -1.32856300 | -3.54788200 | 0.92689800  |
| H | -1.70611600 | -2.10908600 | -0.02819000 |
| C | -1.35653500 | -1.69224500 | 2.06717200  |
| H | -1.99426000 | -0.80330500 | 2.11439200  |
| H | -1.45822300 | -2.20916700 | 3.02616000  |
| C | 0.09844700  | -1.26561100 | 1.84325500  |
| H | 0.21735400  | -0.83823400 | 0.84153000  |
| H | 0.76080000  | -2.14207500 | 1.88483100  |
| C | 0.62497200  | -0.25065300 | 2.87423900  |
| O | 1.49400500  | 0.59494600  | 2.44924800  |
| O | 0.20606500  | -0.30991700 | 4.05124100  |

## 2-GHB-e

|   |             |            |             |
|---|-------------|------------|-------------|
| C | 2.25822000  | 6.07208600 | -0.53998000 |
| C | 0.92954500  | 5.36609600 | -0.85097500 |
| C | 1.11485000  | 3.84777800 | -0.79939800 |
| C | 1.68345200  | 3.35786100 | 0.54947400  |
| C | 2.98522400  | 4.11392300 | 0.89261100  |
| C | 2.79499900  | 5.63575600 | 0.82998300  |
| N | 1.81189500  | 1.89675700 | 0.64903500  |
| O | -0.09533600 | 3.09969500 | -1.14882300 |
| H | 1.23938400  | 1.46432600 | 1.37550000  |
| C | -1.19248700 | 3.13946700 | -0.38095700 |
| O | -1.41051200 | 3.97679500 | 0.48252100  |
| C | -2.10830000 | 1.98815300 | -0.64045100 |

|   |             |             |             |
|---|-------------|-------------|-------------|
| C | -3.28871500 | 1.90086100  | 0.10953200  |
| C | -4.05399800 | 0.74119800  | 0.08175200  |
| C | -3.65703000 | -0.35334800 | -0.70325300 |
| C | -2.52503700 | -0.22961200 | -1.51633900 |
| C | -1.75231700 | 0.93126000  | -1.48522300 |
| C | 2.53521300  | 1.01747400  | -0.09324800 |
| N | 2.29223300  | -0.27872200 | 0.22190200  |
| S | 3.56684600  | 1.52541800  | -1.38775900 |
| C | 3.16465400  | -1.30964700 | -0.01286800 |
| C | 2.62596000  | -2.60072500 | -0.27512600 |
| C | 3.43798200  | -3.70653600 | -0.43902700 |
| C | 4.83122900  | -3.56330600 | -0.33255300 |
| C | 5.39763000  | -2.30594500 | -0.05464300 |
| C | 4.58115400  | -1.20310600 | 0.09758100  |
| F | -6.53983100 | -0.84300700 | 0.05695100  |
| C | -5.87526800 | -1.67996100 | -0.76606300 |
| F | -6.42733300 | -2.89904000 | -0.61950400 |
| F | -6.11906100 | -1.27639000 | -2.03729900 |
| N | 5.67701400  | -4.70287000 | -0.49897600 |
| O | 6.91187000  | -4.55596500 | -0.41780900 |
| O | 5.15840200  | -5.81439400 | -0.71992400 |
| H | 2.10845400  | 7.15714500  | -0.56674600 |
| H | 2.99890700  | 5.83532600  | -1.31607100 |
| H | 0.17274500  | 5.67568700  | -0.12599200 |
| H | 0.56585100  | 5.64147000  | -1.84756900 |
| H | 3.76887500  | 3.80880600  | 0.19350900  |
| H | 3.30303200  | 3.80443600  | 1.89468600  |
| H | 3.74919400  | 6.13145200  | 1.04228300  |
| H | 2.09222600  | 5.95628500  | 1.61203500  |
| H | -3.56772700 | 2.72405400  | 0.75730600  |
| H | -4.92662400 | 0.67181000  | 0.71868500  |
| H | -2.19171700 | -1.05947300 | -2.12810100 |
| H | -0.84499500 | 0.99071000  | -2.07369000 |
| H | 1.55063000  | -2.70921000 | -0.36037700 |
| H | 3.01218100  | -4.67809400 | -0.65613600 |
| H | 6.47169900  | -2.21452800 | 0.04976700  |
| H | 5.02148600  | -0.24100900 | 0.32328500  |
| C | -4.33676300 | -1.71941000 | -0.51289000 |
| O | -4.21520300 | -2.17116900 | 0.80127100  |
| H | 1.79810000  | 3.53962700  | -1.59083300 |
| H | 0.94930100  | 3.61010700  | 1.32042900  |
| O | -3.81313300 | -2.71378700 | -1.36738400 |
| C | -2.86827800 | -2.27903500 | 1.33727400  |
| H | -2.70596400 | -3.33608500 | 1.56867700  |
| H | -2.13916200 | -1.98533300 | 0.58155200  |
| C | -2.75145200 | -1.42089400 | 2.59433600  |
| H | -3.45820000 | -1.79462000 | 3.34290900  |
| H | -3.04567400 | -0.39283700 | 2.36343100  |
| C | -1.33834000 | -1.42645100 | 3.22154000  |
| H | -0.98258300 | -2.45607400 | 3.33348600  |
| H | -1.39488300 | -0.97352400 | 4.21363400  |
| C | -0.31512100 | -0.63740100 | 2.42306600  |
| O | -0.02682200 | 0.53418700  | 2.68153600  |
| O | 0.22794000  | -1.31192600 | 1.42798400  |
| H | -3.87675800 | -2.43901600 | -2.29457600 |
| H | 1.01101900  | -0.78508400 | 0.94809000  |



## 2-GHB-f

|   |             |             |             |
|---|-------------|-------------|-------------|
| C | -0.11463900 | -4.88874200 | -2.09646600 |
| C | -0.77073300 | -3.51380300 | -1.91493400 |
| C | -0.74474500 | -3.01840300 | -0.46802000 |
| C | 0.64023000  | -3.12697400 | 0.20934800  |
| C | 1.30938900  | -4.49099200 | -0.04760400 |
| C | 1.31101400  | -4.89058400 | -1.52855800 |
| H | 0.50217200  | -3.00257600 | 1.28735200  |
| N | 1.44308200  | -1.98916900 | -0.25109600 |
| H | -1.06366100 | -1.97928100 | -0.42056400 |
| O | -1.67434100 | -3.83869900 | 0.31025700  |
| H | 1.14587000  | -1.50827900 | -1.10208700 |
| C | -2.66258300 | -3.34094800 | 1.07832600  |
| O | -3.19848800 | -4.08088700 | 1.88642000  |
| C | -3.08164100 | -1.91000500 | 0.91719200  |
| C | -3.21280700 | -1.11983300 | 2.06402800  |
| C | -3.55176200 | 0.23015500  | 1.95315400  |
| C | -3.75547200 | 0.80608100  | 0.69510700  |
| C | -3.69310800 | -0.00570300 | -0.44586100 |
| C | -3.36414900 | -1.35176200 | -0.33784700 |
| C | 2.36451200  | -1.32018200 | 0.48646900  |
| N | 2.70874800  | -0.11790700 | -0.04999800 |
| S | 2.90068400  | -1.92937800 | 2.00741500  |
| C | 3.91672100  | 0.49718100  | 0.11602700  |
| C | 3.97559300  | 1.91399000  | -0.03367700 |
| C | 5.16812200  | 2.60299900  | 0.05479300  |
| C | 6.36248300  | 1.89803200  | 0.28571900  |
| C | 6.34423900  | 0.49702300  | 0.41517600  |
| C | 5.14864800  | -0.18731500 | 0.33475900  |
| F | -5.84871700 | 2.03144500  | -1.02277200 |
| C | -5.50620400 | 2.58382000  | 0.15937400  |
| F | -5.75816600 | 3.90463200  | 0.07374000  |
| F | -6.33121200 | 2.07409000  | 1.09867900  |
| N | 7.59735800  | 2.60483500  | 0.38193900  |
| O | 8.64544000  | 1.96596000  | 0.60286300  |
| O | 7.59882800  | 3.84429300  | 0.24246500  |
| H | -0.10675000 | -5.14781300 | -3.16097400 |
| H | -0.71198600 | -5.65650100 | -1.58812700 |
| H | -0.24426100 | -2.77048500 | -2.52494500 |
| H | -1.80778400 | -3.52394700 | -2.26797000 |
| H | 0.75775500  | -5.24429800 | 0.52969700  |
| H | 2.32431100  | -4.45928900 | 0.35817700  |
| H | 1.76587300  | -5.88109600 | -1.64190500 |
| H | 1.93505700  | -4.19071800 | -2.10121500 |
| H | -3.02952900 | -1.55353100 | 3.04109000  |
| H | -3.64631000 | 0.82219300  | 2.85684700  |
| H | -3.87747700 | 0.42129600  | -1.42389800 |
| H | -3.31584400 | -1.95901600 | -1.23498800 |
| H | 3.05535900  | 2.45940900  | -0.21036500 |
| H | 5.19175300  | 3.68098300  | -0.04461700 |
| H | 7.27388100  | -0.03706800 | 0.56855600  |
| H | 5.14524400  | -1.26515700 | 0.42641900  |
| O | -3.82501300 | 3.04656200  | 1.69335500  |
| H | -3.00966500 | 2.77236700  | 2.13671200  |
| C | -4.01736900 | 2.30699300  | 0.51862900  |

|   |             |             |             |
|---|-------------|-------------|-------------|
| O | -3.29687200 | 2.81574400  | -0.58225600 |
| C | -1.88536300 | 3.03374500  | -0.34912800 |
| H | -1.76977500 | 3.93586800  | 0.25987300  |
| H | -1.46181800 | 2.18477400  | 0.20047300  |
| C | -1.18129600 | 3.21261400  | -1.68797600 |
| H | -0.22028600 | 3.69791500  | -1.49318000 |
| H | -1.76914500 | 3.90815600  | -2.29717900 |
| C | -0.94867700 | 1.92346100  | -2.48397800 |
| H | -0.58228300 | 2.17692200  | -3.48702200 |
| H | -1.88138300 | 1.37373600  | -2.64066000 |
| C | 0.06325200  | 0.94009700  | -1.91466400 |
| O | 0.13780700  | -0.21843300 | -2.33696100 |
| O | 0.85150400  | 1.41942000  | -0.97739400 |
| H | 1.59542700  | 0.72232300  | -0.64319400 |

## 2-GHB-g

|   |             |             |             |
|---|-------------|-------------|-------------|
| C | -0.13465500 | 4.54976500  | 2.10409700  |
| C | -0.73829500 | 3.17343600  | 1.78771300  |
| C | -0.62606800 | 2.80124500  | 0.30654700  |
| C | 0.79835200  | 2.96773200  | -0.26073100 |
| C | 1.39816700  | 4.34249500  | 0.09759000  |
| C | 1.31234900  | 4.65168500  | 1.59917300  |
| H | 0.74823400  | 2.86647800  | -1.34629500 |
| N | 1.62178500  | 1.85840400  | 0.21397500  |
| H | -0.95649400 | 1.77609400  | 0.14047700  |
| O | -1.46308600 | 3.71066500  | -0.48241800 |
| H | 1.57282200  | 1.60748800  | 1.19395800  |
| C | -2.77650600 | 3.50330100  | -0.69450000 |
| O | -3.46515300 | 4.43791400  | -1.06514500 |
| C | -3.33714800 | 2.12641300  | -0.49725500 |
| C | -2.89067700 | 1.04944700  | -1.27513600 |
| C | -3.40957600 | -0.22424900 | -1.06216100 |
| C | -4.35930000 | -0.44288300 | -0.05560200 |
| C | -4.83544000 | 0.63985600  | 0.68902100  |
| C | -4.33538900 | 1.92280800  | 0.46082300  |
| C | 2.55708200  | 1.17044100  | -0.49706000 |
| N | 3.07200400  | 0.12066700  | 0.18773500  |
| S | 2.89175700  | 1.57547900  | -2.13903900 |
| C | 4.32675900  | -0.38484700 | 0.01224100  |
| C | 4.56832800  | -1.73810200 | 0.39379100  |
| C | 5.82465200  | -2.30259700 | 0.31255900  |
| C | 6.90702300  | -1.52861300 | -0.14289200 |
| C | 6.71070000  | -0.18276800 | -0.50483800 |
| C | 5.45080900  | 0.37473700  | -0.43176200 |
| F | -6.83614000 | -1.59713500 | -0.99680700 |
| C | -5.77123800 | -2.41237800 | -0.84868400 |
| F | -6.24773400 | -3.63362600 | -0.50747000 |
| F | -5.18136900 | -2.53307700 | -2.05385900 |
| N | 8.20701000  | -2.10574600 | -0.22875000 |
| O | 9.15434200  | -1.40793600 | -0.64386600 |
| O | 8.36703900  | -3.29477600 | 0.11402400  |
| H | -0.17782600 | 4.72484200  | 3.18447600  |
| H | -0.74152400 | 5.33217000  | 1.63170400  |
| H | -0.21876900 | 2.39852900  | 2.36762700  |
| H | -1.78873200 | 3.12114900  | 2.09473800  |
| H | 0.84762300  | 5.10802000  | -0.46275600 |

|   |             |             |             |
|---|-------------|-------------|-------------|
| H | 2.43457600  | 4.37092000  | -0.25339900 |
| H | 1.71036200  | 5.65401200  | 1.79209000  |
| H | 1.94789900  | 3.95368300  | 2.16180200  |
| H | -2.13041400 | 1.19862200  | -2.03510800 |
| H | -3.03954100 | -1.05593600 | -1.65087800 |
| H | -5.57810000 | 0.48017800  | 1.46071100  |
| H | -4.70186400 | 2.75754500  | 1.04930500  |
| H | 3.73761900  | -2.33625400 | 0.75045200  |
| H | 5.98434200  | -3.33633700 | 0.59256000  |
| H | 7.55585300  | 0.41093000  | -0.83089400 |
| H | 5.31220300  | 1.41251500  | -0.70395700 |
| C | -4.80489100 | -1.87239100 | 0.24974700  |
| O | -5.49957900 | -1.87007100 | 1.46887300  |
| H | -5.73606900 | -2.78376400 | 1.69287600  |
| O | -3.74408900 | -2.79216800 | 0.23538000  |
| C | -2.64668900 | -2.51959800 | 1.13694200  |
| H | -2.23807500 | -1.52950000 | 0.91424600  |
| H | -3.01342800 | -2.51992600 | 2.16879400  |
| C | -1.58486400 | -3.59024300 | 0.92657700  |
| H | -1.43926000 | -3.74032300 | -0.14713200 |
| H | -1.92348100 | -4.53992200 | 1.35226100  |
| C | -0.25119100 | -3.18450500 | 1.56311400  |
| H | 0.41869600  | -4.05227500 | 1.61141600  |
| H | -0.37687700 | -2.84583400 | 2.59702900  |
| C | 0.49788300  | -2.11611200 | 0.78103300  |
| O | 1.40228200  | -1.47556000 | 1.51505400  |
| O | 0.31204600  | -1.89388600 | -0.40964400 |
| H | 1.99221900  | -0.83739600 | 0.95087500  |

## 2-GHB-h

|   |             |             |             |
|---|-------------|-------------|-------------|
| C | -0.88566500 | 5.14083800  | 1.46612400  |
| C | -1.23286300 | 3.64497100  | 1.42476100  |
| C | -1.09454900 | 3.04067600  | 0.02818500  |
| C | 0.27160400  | 3.34770100  | -0.63443000 |
| C | 0.62900800  | 4.84171800  | -0.54095800 |
| C | 0.51052200  | 5.40357900  | 0.88423600  |
| H | 0.21112200  | 3.04591700  | -1.68114000 |
| N | 1.30696500  | 2.51502000  | -0.03068200 |
| H | -1.23292900 | 1.95961500  | 0.05564000  |
| O | -2.11751400 | 3.62855500  | -0.84252300 |
| H | 1.69416600  | 2.80870400  | 0.85829700  |
| C | -3.03057400 | 2.90224100  | -1.51233100 |
| O | -3.62371500 | 3.41797200  | -2.44409400 |
| C | -3.31011200 | 1.49527100  | -1.07259900 |
| C | -3.12991500 | 0.44760800  | -1.97930600 |
| C | -3.35060800 | -0.87298600 | -1.58216300 |
| C | -3.78416400 | -1.15590700 | -0.28271500 |
| C | -4.02768700 | -0.09525100 | 0.60201200  |
| C | -3.78252000 | 1.21852200  | 0.21808400  |
| C | 1.85826800  | 1.38054400  | -0.54412800 |
| N | 2.69093200  | 0.76154400  | 0.33099500  |
| S | 1.39209100  | 0.78716600  | -2.09255400 |
| C | 3.76980900  | 0.00078000  | -0.01672000 |
| C | 4.26120700  | -0.94048900 | 0.93500200  |
| C | 5.38497400  | -1.70260800 | 0.68951000  |
| C | 6.08018900  | -1.54382200 | -0.52217100 |

|   |             |             |             |
|---|-------------|-------------|-------------|
| C | 5.63990100  | -0.60530200 | -1.47290800 |
| C | 4.51008600  | 0.14845300  | -1.22688900 |
| F | -4.80733900 | -3.54038100 | -1.73535400 |
| C | -3.88720400 | -3.71011000 | -0.76152800 |
| F | -4.15024000 | -4.89479100 | -0.16599100 |
| F | -2.67921600 | -3.82859600 | -1.35964000 |
| N | 7.24192300  | -2.32963700 | -0.78292700 |
| O | 7.84080100  | -2.18435100 | -1.86695400 |
| O | 7.62961200  | -3.14197800 | 0.08008700  |
| H | -0.94284600 | 5.49816800  | 2.49988700  |
| H | -1.63147000 | 5.70638800  | 0.89366300  |
| H | -0.55699100 | 3.09084700  | 2.08898800  |
| H | -2.24627400 | 3.46811200  | 1.79894900  |
| H | -0.05962700 | 5.38728300  | -1.19644800 |
| H | 1.63738700  | 4.98946500  | -0.94197600 |
| H | 0.72078200  | 6.47864100  | 0.87089700  |
| H | 1.27138600  | 4.95460700  | 1.53853500  |
| H | -2.78578900 | 0.65532000  | -2.98675400 |
| H | -3.16223400 | -1.66299800 | -2.29809800 |
| H | -4.38951300 | -0.30507400 | 1.60184100  |
| H | -3.95608100 | 2.02300600  | 0.92481300  |
| H | 3.73412300  | -1.05944500 | 1.87500300  |
| H | 5.73451200  | -2.42204200 | 1.41928900  |
| H | 6.19800600  | -0.47362300 | -2.39169600 |
| H | 4.18493500  | 0.87379800  | -1.96037800 |
| C | -3.92521200 | -2.56258500 | 0.29584400  |
| O | -5.16697700 | -2.64096800 | 0.93560700  |
| H | -5.16355500 | -3.42178100 | 1.51259400  |
| O | -2.94794700 | -2.85451100 | 1.27619400  |
| C | -1.56133200 | -2.48548400 | 1.06597800  |
| H | -0.98425600 | -3.41326100 | 0.99855600  |
| H | -1.45266200 | -1.95040200 | 0.12003100  |
| C | -1.09242700 | -1.61857100 | 2.22857400  |
| H | -1.77582300 | -0.76975700 | 2.33204800  |
| H | -1.14359000 | -2.18812200 | 3.16106800  |
| C | 0.33049800  | -1.10234200 | 1.99737500  |
| H | 0.40156800  | -0.57546000 | 1.04046400  |
| H | 1.04058800  | -1.93860100 | 1.93279000  |
| C | 0.82665100  | -0.18914200 | 3.10919500  |
| O | 1.83216700  | 0.62982200  | 2.81459900  |
| O | 0.35661400  | -0.20607700 | 4.23995700  |
| H | 2.14239000  | 0.63393200  | 1.82196700  |

**Annex V:** XYZ cartesian coordinates of the optimized energies of the two **2-GHB** series (with and without hydrogen bond) with increasing hydroxyacid chain (XYZ cartesian coordinates of 2-GHB-a is present already on previous Annex IV).

#### **2-GHB-a(3C)**

|   |             |            |             |
|---|-------------|------------|-------------|
| C | 2.33343900  | 5.61463400 | -0.55956600 |
| C | 1.00453000  | 5.01377600 | -1.03982000 |
| C | 0.99338500  | 3.49537100 | -0.83712100 |
| C | 1.34642800  | 3.05403200 | 0.60022800  |
| C | 2.61424400  | 3.75839100 | 1.13103100  |
| C | 2.56657000  | 5.27673800 | 0.91833300  |
| N | 1.40156600  | 1.58749500 | 0.75819900  |
| O | -0.26541000 | 2.86173700 | -1.24764500 |

|   |             |             |             |
|---|-------------|-------------|-------------|
| H | 0.66664300  | 1.19632400  | 1.37242300  |
| C | -1.42745600 | 3.14486800  | -0.63727700 |
| O | -1.62244500 | 4.11760400  | 0.07608500  |
| C | -2.45496100 | 2.08215300  | -0.84625300 |
| C | -3.69445500 | 2.23025600  | -0.20875800 |
| C | -4.57566900 | 1.15861800  | -0.12516100 |
| C | -4.23569300 | -0.08331400 | -0.68546900 |
| C | -3.04825200 | -0.19096200 | -1.41996900 |
| C | -2.15977400 | 0.88060700  | -1.49767800 |
| C | 2.25015500  | 0.70614200  | 0.19431600  |
| N | 1.95422300  | -0.60178100 | 0.53113200  |
| S | 3.50455900  | 1.11475300  | -0.89022000 |
| C | 2.73851300  | -1.74232500 | 0.41541000  |
| C | 2.05847300  | -2.98061500 | 0.32732800  |
| C | 2.75721200  | -4.17350200 | 0.26126000  |
| C | 4.15734200  | -4.14850600 | 0.28729300  |
| C | 4.85227800  | -2.93755200 | 0.39721700  |
| C | 4.15040700  | -1.74483600 | 0.46357600  |
| F | -7.02286700 | -0.34257600 | 0.59197500  |
| C | -6.55253900 | -1.20551700 | -0.33404500 |
| F | -7.16400600 | -2.38473100 | -0.11385800 |
| F | -6.95991500 | -0.76044500 | -1.54759000 |
| N | 4.89313600  | -5.38676200 | 0.20996400  |
| O | 6.13301000  | -5.34453100 | 0.21303400  |
| O | 4.26133900  | -6.45239600 | 0.14376200  |
| H | 2.31345300  | 6.69979400  | -0.70895600 |
| H | 3.16674700  | 5.22680900  | -1.16123100 |
| H | 0.18323300  | 5.47046200  | -0.48451600 |
| H | 0.84097000  | 5.22191000  | -2.10338400 |
| H | 3.49058600  | 3.35015900  | 0.62218500  |
| H | 2.71213900  | 3.51675700  | 2.19531200  |
| H | 3.50511800  | 5.71932400  | 1.27081600  |
| H | 1.76207300  | 5.71914700  | 1.52235600  |
| H | -3.93062000 | 3.16855200  | 0.28002300  |
| H | -5.49307300 | 1.28177600  | 0.43553200  |
| H | -2.76814900 | -1.13457500 | -1.87300000 |
| H | -1.21182200 | 0.75852300  | -2.00721800 |
| H | 0.97491400  | -0.80145200 | 0.85150800  |
| H | 0.97471200  | -2.98499900 | 0.31314400  |
| H | 2.23291300  | -5.11716200 | 0.18142000  |
| H | 5.93388000  | -2.93912400 | 0.44337100  |
| H | 4.68866600  | -0.81357800 | 0.56049500  |
| C | -5.00074800 | -1.36456200 | -0.31730200 |
| O | -4.72145100 | -1.77956300 | 0.98811800  |
| H | 1.70623100  | 3.03814900  | -1.52327600 |
| H | 0.51452300  | 3.35543900  | 1.24326700  |
| O | -4.70177100 | -2.43276500 | -1.19200500 |
| C | -3.32262300 | -2.00130000 | 1.33332600  |
| H | -3.32074500 | -2.94388500 | 1.88383100  |
| H | -2.73614500 | -2.14823500 | 0.42757700  |
| C | -2.74924800 | -0.85148700 | 2.17583200  |
| H | -2.83483300 | -1.07860300 | 3.24520200  |
| H | -3.33361400 | 0.05632000  | 2.01493600  |
| C | -1.27500000 | -0.51664800 | 1.89223600  |
| H | -4.76783700 | -2.14318000 | -2.11451100 |
| O | -0.83821100 | 0.59310900  | 2.31449300  |
| O | -0.58165400 | -1.37002100 | 1.25875200  |

## 2-GHB-a(5C)

|   |             |             |             |
|---|-------------|-------------|-------------|
| C | 2.06864100  | 6.11806900  | -0.55660500 |
| C | 0.77891200  | 5.34711400  | -0.87976900 |
| C | 1.03399600  | 3.84035300  | -0.79977800 |
| C | 1.59187200  | 3.40875300  | 0.57267500  |
| C | 2.86166300  | 4.21478400  | 0.91742400  |
| C | 2.60641300  | 5.72609700  | 0.82663900  |
| N | 1.75501400  | 1.95338000  | 0.71465100  |
| O | -0.12748900 | 3.02733400  | -1.16296300 |
| H | 1.15339200  | 1.53221400  | 1.45122500  |
| C | -1.23454600 | 3.01094700  | -0.40515700 |
| O | -1.49946100 | 3.83763100  | 0.45487200  |
| C | -2.08877500 | 1.81663300  | -0.67570900 |
| C | -3.20840100 | 1.61286000  | 0.14183500  |
| C | -3.91556200 | 0.41853600  | 0.07842100  |
| C | -3.52660200 | -0.59183200 | -0.81478000 |
| C | -2.45375500 | -0.35568100 | -1.68089100 |
| C | -1.73447200 | 0.83764600  | -1.61050900 |
| C | 2.51269800  | 1.10648600  | -0.00351200 |
| N | 2.27301300  | -0.21531400 | 0.32959000  |
| S | 3.59044000  | 1.56882100  | -1.24497700 |
| C | 3.03787900  | -1.34609800 | 0.08190700  |
| C | 2.36013200  | -2.58922700 | 0.09189300  |
| C | 3.04583900  | -3.77618000 | -0.09541300 |
| C | 4.43239900  | -3.74157300 | -0.29307200 |
| C | 5.12829200  | -2.52611800 | -0.28549500 |
| C | 4.43930400  | -1.33879000 | -0.09789800 |
| F | -6.36162600 | -1.22187400 | 0.02504400  |
| C | -5.71089300 | -1.96391400 | -0.89471000 |
| F | -6.23076200 | -3.20487400 | -0.83948600 |
| F | -6.01537300 | -1.45432700 | -2.11461100 |
| N | 5.15369300  | -4.97357300 | -0.49502500 |
| O | 6.37884700  | -4.92336500 | -0.68500500 |
| O | 4.52516200  | -6.04319700 | -0.47124200 |
| H | 1.86900900  | 7.19442100  | -0.59983100 |
| H | 2.83089200  | 5.90670700  | -1.31900600 |
| H | -0.00542600 | 5.63064900  | -0.17346000 |
| H | 0.42230800  | 5.59007200  | -1.88711300 |
| H | 3.66619000  | 3.93277900  | 0.23273900  |
| H | 3.17960900  | 3.93582700  | 1.92815100  |
| H | 3.53575500  | 6.26561800  | 1.04151500  |
| H | 1.88143100  | 6.02745000  | 1.59565500  |
| H | -3.48339900 | 2.37399400  | 0.86303800  |
| H | -4.73927200 | 0.25773200  | 0.76207600  |
| H | -2.12468700 | -1.12173000 | -2.37318000 |
| H | -0.87106300 | 0.98489500  | -2.24778800 |
| H | 1.35522100  | -0.42219700 | 0.79499600  |
| H | 1.28847000  | -2.60104900 | 0.25373800  |
| H | 2.52086300  | -4.72281600 | -0.09754300 |
| H | 6.20336300  | -2.52020800 | -0.41294100 |
| H | 4.98013100  | -0.40422200 | -0.08115000 |
| C | -4.16229200 | -1.98756800 | -0.70378100 |
| O | -3.97775500 | -2.52569900 | 0.56761100  |
| H | 1.75000700  | 3.55560400  | -1.57110300 |
| H | 0.83570900  | 3.65644200  | 1.32296300  |

|   |             |             |             |
|---|-------------|-------------|-------------|
| O | -3.65585200 | -2.89800400 | -1.65655600 |
| C | -1.30465600 | -0.83879000 | 3.63914200  |
| C | -0.38405200 | -0.25187400 | 2.56160400  |
| O | 0.04390800  | 0.93068300  | 2.73056200  |
| O | -0.06249300 | -0.98827700 | 1.57746800  |
| H | -3.77025300 | -2.55241000 | -2.55432100 |
| C | -2.60317600 | -2.82118000 | 0.95245300  |
| H | -2.33729200 | -3.79201400 | 0.52291900  |
| H | -1.92912200 | -2.05921600 | 0.55849500  |
| C | -2.52915400 | -2.86107600 | 2.47163000  |
| H | -3.32904700 | -3.52193800 | 2.82788700  |
| H | -1.58537900 | -3.35204800 | 2.73696900  |
| C | -2.62798800 | -1.49252400 | 3.18346600  |
| H | -3.18771100 | -0.78978300 | 2.55573300  |
| H | -3.23056800 | -1.62214100 | 4.08986500  |
| H | -1.53392700 | -0.03732000 | 4.34727900  |
| H | -0.71352300 | -1.58581100 | 4.18814000  |

## 2-GHB-a(6C)

|   |             |             |             |
|---|-------------|-------------|-------------|
| C | 2.00070500  | 6.09820800  | -0.59573100 |
| C | 0.74875300  | 5.27470800  | -0.93244800 |
| C | 1.04302200  | 3.77686200  | -0.80720400 |
| C | 1.62979600  | 3.37965100  | 0.56379800  |
| C | 2.82759400  | 4.27500000  | 0.94898500  |
| C | 2.49578300  | 5.76720700  | 0.81808300  |
| N | 1.93131800  | 1.94104800  | 0.67228400  |
| O | -0.11075200 | 2.93107000  | -1.12952600 |
| H | 1.37947800  | 1.44263100  | 1.39558100  |
| C | -1.23427900 | 2.96988900  | -0.39686800 |
| O | -1.48861300 | 3.82383100  | 0.44036200  |
| C | -2.13502900 | 1.80983700  | -0.66198900 |
| C | -3.38224700 | 1.78682200  | -0.02121300 |
| C | -4.16875000 | 0.64290800  | -0.05873100 |
| C | -3.71623800 | -0.50382600 | -0.72877400 |
| C | -2.51033200 | -0.45510400 | -1.43201500 |
| C | -1.72229200 | 0.69678900  | -1.40292100 |
| C | 2.79691900  | 1.20051800  | -0.04486200 |
| N | 2.71595900  | -0.14373200 | 0.26906800  |
| S | 3.82364100  | 1.80316600  | -1.27004400 |
| C | 3.61772200  | -1.16818800 | 0.02505700  |
| C | 3.09940700  | -2.48643600 | 0.02191700  |
| C | 3.92865900  | -3.57792400 | -0.16395800 |
| C | 5.30237800  | -3.37109300 | -0.34706000 |
| C | 5.84218400  | -2.07876800 | -0.32510700 |
| C | 5.00989800  | -0.98708600 | -0.13869100 |
| F | -6.63333800 | -0.84515400 | -0.94078200 |
| C | -5.82522600 | -1.86684600 | -1.28327300 |
| F | -6.50093000 | -3.01057200 | -1.04052800 |
| F | -5.62888400 | -1.79739700 | -2.62640500 |
| N | 6.17167300  | -4.50240100 | -0.55059900 |
| O | 7.38211300  | -4.29969900 | -0.73486500 |
| O | 5.68110000  | -5.64223700 | -0.53439700 |
| H | 1.76595400  | 7.16487200  | -0.68205800 |
| H | 2.79793000  | 5.88917600  | -1.32211600 |
| H | -0.06057200 | 5.55481600  | -0.25493500 |
| H | 0.41048300  | 5.47757500  | -1.95499500 |

|   |             |             |             |
|---|-------------|-------------|-------------|
| H | 3.67754300  | 4.03256000  | 0.30603700  |
| H | 3.11549000  | 4.02948400  | 1.97732400  |
| H | 3.38600500  | 6.35837100  | 1.06112200  |
| H | 1.72241900  | 6.04634700  | 1.54732000  |
| H | -3.70273800 | 2.65329700  | 0.54593800  |
| H | -5.10386600 | 0.62002100  | 0.48698900  |
| H | -2.13944200 | -1.33056600 | -1.95177100 |
| H | -0.76346600 | 0.70751400  | -1.90700400 |
| H | 1.81013900  | -0.46705400 | 0.69914800  |
| H | 2.03568600  | -2.63137600 | 0.17224600  |
| H | 3.52527200  | -4.58235300 | -0.17661600 |
| H | 6.90944000  | -1.93902500 | -0.44142800 |
| H | 5.43094300  | 0.00698900  | -0.11270100 |
| C | -4.45852500 | -1.83360600 | -0.52645800 |
| O | -4.68879300 | -1.90509900 | 0.84727100  |
| H | 1.75177600  | 3.48698600  | -1.58285600 |
| H | 0.84729400  | 3.54061500  | 1.31050400  |
| O | -3.71582600 | -2.94799100 | -0.95141400 |
| C | -0.90259600 | -1.35910200 | 3.32563300  |
| C | 0.02125300  | -0.56193200 | 2.39869800  |
| O | 0.31374700  | 0.63670400  | 2.68665300  |
| O | 0.44990200  | -1.17075700 | 1.36570800  |
| H | -3.68945000 | -2.99809000 | -1.91829300 |
| C | -4.82433700 | -3.16810400 | 1.54505100  |
| H | -5.84215700 | -3.54804100 | 1.40524600  |
| H | -4.11790700 | -3.89422500 | 1.13625600  |
| C | -4.55076700 | -2.88598400 | 3.02000100  |
| H | -5.12717700 | -1.99796200 | 3.30991700  |
| H | -4.96982100 | -3.72447800 | 3.59046800  |
| C | -3.07441500 | -2.71483100 | 3.42482200  |
| H | -3.04789800 | -2.53073000 | 4.50767100  |
| H | -2.54921600 | -3.66777100 | 3.26728300  |
| C | -2.29443100 | -1.60199100 | 2.70707200  |
| H | -2.17284900 | -1.86391100 | 1.65253200  |
| H | -2.86985900 | -0.66853200 | 2.72952200  |
| H | -0.42104800 | -2.32760800 | 3.51130900  |
| H | -1.00036000 | -0.84188700 | 4.28553500  |

## 2-GHB-a(7C)

|   |             |             |             |
|---|-------------|-------------|-------------|
| C | 1.88729700  | 6.03126100  | -0.53960700 |
| C | 0.62941300  | 5.20161300  | -0.84291000 |
| C | 0.95412300  | 3.70781000  | -0.76659400 |
| C | 1.55055400  | 3.30456800  | 0.59772600  |
| C | 2.78903100  | 4.16667100  | 0.92076100  |
| C | 2.46511600  | 5.66495400  | 0.83434200  |
| N | 1.78190600  | 1.85934700  | 0.74292400  |
| O | -0.17609700 | 2.84787900  | -1.12063300 |
| H | 1.21473700  | 1.42592600  | 1.49831000  |
| C | -1.27878600 | 2.79550800  | -0.35926700 |
| O | -1.53328400 | 3.57657300  | 0.54586200  |
| C | -2.15406200 | 1.63505000  | -0.69935100 |
| C | -3.29840100 | 1.43173600  | 0.08394100  |
| C | -4.06492400 | 0.28533800  | -0.07939500 |
| C | -3.70653300 | -0.67507000 | -1.03706800 |
| C | -2.59749200 | -0.44773600 | -1.85539800 |
| C | -1.82086700 | 0.70020000  | -1.68657900 |



|   |             |             |             |
|---|-------------|-------------|-------------|
| C | 2.56878300  | 1.04523600  | 0.01703200  |
| N | 2.42560300  | -0.28015200 | 0.38276900  |
| S | 3.57533200  | 1.55362900  | -1.26647600 |
| C | 3.21971400  | -1.37980500 | 0.08694600  |
| C | 2.59964100  | -2.65040300 | 0.16782300  |
| C | 3.31677800  | -3.81009800 | -0.06643600 |
| C | 4.67873800  | -3.72018400 | -0.38231500 |
| C | 5.32026700  | -2.47701900 | -0.44393500 |
| C | 4.59971000  | -1.31676700 | -0.20945700 |
| F | -6.64602000 | -1.09197900 | -0.60350900 |
| C | -5.94681700 | -1.83314200 | -1.48534400 |
| F | -6.59218700 | -3.01262500 | -1.61144000 |
| F | -6.02268100 | -1.21434700 | -2.69156200 |
| N | 5.43180500  | -4.92334000 | -0.63657700 |
| O | 6.63280700  | -4.82426000 | -0.93204800 |
| O | 4.85353000  | -6.01779300 | -0.55101600 |
| H | 1.63772000  | 7.09730900  | -0.57916000 |
| H | 2.64598400  | 5.85489700  | -1.31435300 |
| H | -0.15636100 | 5.45029500  | -0.12498700 |
| H | 0.24746900  | 5.42712800  | -1.84500600 |
| H | 3.59424800  | 3.92042400  | 0.22299200  |
| H | 3.13559800  | 3.90314800  | 1.92621700  |
| H | 3.37269700  | 6.24599700  | 1.03358800  |
| H | 1.74037200  | 5.93387600  | 1.61550300  |
| H | -3.55264600 | 2.15738500  | 0.84798600  |
| H | -4.91494100 | 0.11797200  | 0.57008100  |
| H | -2.30027200 | -1.18494900 | -2.59193800 |
| H | -0.93770900 | 0.84873600  | -2.29612500 |
| H | 1.56146200  | -0.52406500 | 0.92775100  |
| H | 1.54719100  | -2.70529500 | 0.42106400  |
| H | 2.83423600  | -4.77770600 | -0.01507600 |
| H | 6.37948200  | -2.42771000 | -0.66228600 |
| H | 5.09938600  | -0.36048100 | -0.24858500 |
| C | -4.44716300 | -2.01932400 | -1.06666400 |
| O | -4.32267300 | -2.50505000 | 0.22590900  |
| H | 1.67226400  | 3.45615700  | -1.54701200 |
| H | 0.79557200  | 3.52014200  | 1.35847600  |
| O | -3.88274700 | -2.95146500 | -1.96243500 |
| C | -0.74103000 | -1.03818800 | 4.03905600  |
| C | -0.05869800 | -0.38880200 | 2.82867400  |
| O | 0.15357100  | 0.86199500  | 2.85464100  |
| O | 0.28607400  | -1.14624200 | 1.86729800  |
| H | -4.07015600 | -2.71194800 | -2.88255400 |
| C | -4.88862600 | -3.78002700 | 0.61947900  |
| H | -5.92649400 | -3.61017900 | 0.93027300  |
| H | -4.87798800 | -4.47257900 | -0.22502300 |
| C | -2.39525600 | -2.65147900 | 2.82530600  |
| H | -1.63956400 | -3.42800300 | 3.01081800  |
| C | -2.19851000 | -1.50511900 | 3.82612800  |
| H | -2.81831900 | -0.64848700 | 3.52717200  |
| H | -2.57703000 | -1.82395500 | 4.80734100  |
| H | -0.71867000 | -0.32201800 | 4.86592800  |
| H | -0.13787500 | -1.90672700 | 4.33283700  |
| C | -3.78864200 | -3.29865800 | 2.91163300  |
| H | -3.88245700 | -3.79767300 | 3.88437000  |
| H | -4.56105200 | -2.51800900 | 2.89522000  |
| C | -4.06057400 | -4.31969700 | 1.78153200  |

|   |             |             |            |
|---|-------------|-------------|------------|
| H | -4.60748100 | -5.18734700 | 2.17009700 |
| H | -3.10700200 | -4.70182600 | 1.39645800 |
| H | -2.22015100 | -2.29112300 | 1.80806700 |

## 2-GHB-a'(3C)

|   |             |             |             |
|---|-------------|-------------|-------------|
| C | -2.21730900 | 6.34231100  | -0.17495700 |
| C | -1.12758300 | 5.26049300  | -0.21251400 |
| C | -1.62555500 | 3.95140900  | 0.39580100  |
| C | -2.89070500 | 3.45254100  | -0.31536600 |
| C | -3.98633700 | 4.53533200  | -0.25353500 |
| C | -3.50252400 | 5.85891500  | -0.85951400 |
| N | -3.33743500 | 2.19472000  | 0.28550300  |
| O | -0.54341500 | 2.98377400  | 0.25383200  |
| H | -3.03970500 | 2.03612800  | 1.24505600  |
| C | -0.34568100 | 2.08028500  | 1.22732300  |
| O | -1.09735800 | 1.94405100  | 2.18547400  |
| C | 0.87798000  | 1.25978200  | 1.01424500  |
| C | 1.13331800  | 0.20385500  | 1.89882100  |
| C | 2.26801800  | -0.58685300 | 1.73725000  |
| C | 3.16802400  | -0.32484300 | 0.69683000  |
| C | 2.91235800  | 0.72990700  | -0.18870100 |
| C | 1.77413800  | 1.51735800  | -0.03325700 |
| C | -3.99382800 | 1.20650800  | -0.35262600 |
| N | -4.36589100 | 0.18632600  | 0.50481700  |
| S | -4.36647300 | 1.24874400  | -2.00388700 |
| C | -4.85232600 | -1.09910400 | 0.25460300  |
| C | -5.58826300 | -1.71138400 | 1.29071300  |
| C | -6.07221800 | -3.00138700 | 1.15120700  |
| C | -5.82133500 | -3.69348700 | -0.03801400 |
| C | -5.08129600 | -3.11170300 | -1.07128000 |
| C | -4.59342500 | -1.82079700 | -0.92617100 |
| F | 2.99061500  | -3.08230500 | 0.01489700  |
| C | 4.08428200  | -2.40926600 | -0.40761500 |
| F | 5.09265500  | -3.30468400 | -0.47483500 |
| F | 3.83744000  | -1.98668900 | -1.66561000 |
| N | -6.33140800 | -5.04078800 | -0.19820200 |
| O | -6.12298300 | -5.62872800 | -1.26720300 |
| O | -6.95562700 | -5.55164000 | 0.74075800  |
| H | -1.84215100 | 7.25116500  | -0.65707000 |
| H | -2.43546200 | 6.60579300  | 0.86879600  |
| H | -0.82326900 | 5.07284400  | -1.24986300 |
| H | -0.23669400 | 5.58530300  | 0.33431900  |
| H | -4.27387600 | 4.68650200  | 0.79535400  |
| H | -4.86983300 | 4.16342400  | -0.78069200 |
| H | -4.29038100 | 6.61450200  | -0.76894100 |
| H | -3.31704000 | 5.72285400  | -1.93362100 |
| H | 0.43806300  | 0.00704700  | 2.70695500  |
| H | 2.45353100  | -1.40809700 | 2.41980100  |
| H | 3.60837500  | 0.93848400  | -0.99162400 |
| H | 1.58325900  | 2.33401000  | -0.71888700 |
| H | -4.35682100 | 0.43083600  | 1.48867800  |
| H | -5.78543400 | -1.16344100 | 2.20669700  |
| H | -6.64394500 | -3.46666400 | 1.94355400  |
| H | -4.87937200 | -3.67356300 | -1.97416700 |
| H | -4.01124300 | -1.37469500 | -1.71834400 |
| C | 4.41631700  | -1.19832700 | 0.52713900  |

|   |             |             |             |
|---|-------------|-------------|-------------|
| O | 4.81212500  | -1.81532500 | 1.72588900  |
| H | -1.82153000 | 4.07650600  | 1.46515200  |
| H | -2.64727400 | 3.24340800  | -1.36196500 |
| H | 4.96575800  | -1.12747600 | 2.39141400  |
| O | 5.40380400  | -0.38396700 | -0.03052700 |
| C | 6.74198100  | -0.91931200 | -0.23484600 |
| H | 6.75329700  | -1.52118500 | -1.14722300 |
| H | 7.01193600  | -1.55613200 | 0.60920600  |
| C | 7.67871400  | 0.26923300  | -0.35462400 |
| H | 7.34718600  | 0.92402800  | -1.16942000 |
| H | 7.63356300  | 0.87097300  | 0.56068100  |
| C | 9.15532600  | -0.10690900 | -0.61287400 |
| O | 9.96306000  | 0.86278800  | -0.69763800 |
| O | 9.44376400  | -1.33326500 | -0.71868300 |

## 2-GHB-a'

|   |             |             |             |
|---|-------------|-------------|-------------|
| C | 2.26312100  | 6.39593300  | 0.15170300  |
| C | 1.20117600  | 5.28569900  | 0.16194600  |
| C | 1.74758200  | 3.99297400  | -0.43941100 |
| C | 3.00923400  | 3.52629100  | 0.29964000  |
| C | 4.07795700  | 4.63637100  | 0.26422400  |
| C | 3.54632000  | 5.94486900  | 0.86227200  |
| N | 3.50351100  | 2.28022700  | -0.28775200 |
| O | 0.69320600  | 2.99230600  | -0.32381700 |
| H | 3.26001400  | 2.12495200  | -1.26261200 |
| C | 0.54915300  | 2.08475500  | -1.30310400 |
| O | 1.31185800  | 1.99345100  | -2.25752800 |
| C | -0.62885200 | 1.19688400  | -1.10061100 |
| C | -0.83942600 | 0.15622000  | -2.01467100 |
| C | -1.92546500 | -0.70152300 | -1.86281100 |
| C | -2.82033600 | -0.52443800 | -0.80001300 |
| C | -2.60947000 | 0.51460400  | 0.11517000  |
| C | -1.52074300 | 1.37091300  | -0.03265100 |
| C | 4.16123500  | 1.30718100  | 0.37229100  |
| N | 4.59850900  | 0.30181900  | -0.47120300 |
| S | 4.46325300  | 1.35052700  | 2.03808500  |
| C | 5.12630700  | -0.96276200 | -0.19567700 |
| C | 5.95931400  | -1.53288500 | -1.18028000 |
| C | 6.49129300  | -2.80072100 | -1.01215400 |
| C | 6.19035200  | -3.51141400 | 0.15403300  |
| C | 5.35394800  | -2.97185500 | 1.13550500  |
| C | 4.81868800  | -1.70350900 | 0.96121600  |
| F | -2.48145500 | -3.31804800 | -0.30445700 |
| C | -3.57898200 | -2.71836100 | 0.20721400  |
| F | -4.54570200 | -3.65937900 | 0.27216300  |
| F | -3.28787600 | -2.35319700 | 1.47345300  |
| N | 6.75024200  | -4.83521700 | 0.34460600  |
| O | 6.49233700  | -5.44077400 | 1.39263800  |
| O | 7.46434800  | -5.30861800 | -0.54869700 |
| H | 1.85363300  | 7.29287000  | 0.62820900  |
| H | 2.49636200  | 6.66889400  | -0.88634800 |
| H | 0.87859200  | 5.08630300  | 1.19156700  |
| H | 0.31450600  | 5.58941400  | -0.40363400 |
| H | 4.38562900  | 4.79797800  | -0.77736300 |
| H | 4.95857200  | 4.28584900  | 0.81070300  |

|   |              |             |             |
|---|--------------|-------------|-------------|
| H | 4.31507900   | 6.72180500  | 0.79007100  |
| H | 3.34187300   | 5.80079300  | 1.93188400  |
| H | -0.14714200  | 0.02371700  | -2.83822800 |
| H | -2.07605300  | -1.50955200 | -2.56935000 |
| H | -3.30106000  | 0.65661000  | 0.93614400  |
| H | -1.36465200  | 2.17443300  | 0.67686100  |
| H | 4.62981500   | 0.54947700  | -1.45393500 |
| H | 6.19518500   | -0.96898700 | -2.07719300 |
| H | 7.13804800   | -3.23387100 | -1.76397100 |
| H | 5.11593100   | -3.54887400 | 2.01983400  |
| H | 4.16293700   | -1.28940800 | 1.71243100  |
| C | -4.01094400  | -1.47551800 | -0.64014300 |
| O | -4.42085000  | -2.03970500 | -1.85901100 |
| H | 1.96378900   | 4.12759100  | -1.50357400 |
| H | 2.74742400   | 3.30998700  | 1.34009600  |
| H | -4.61303300  | -1.32352200 | -2.48350600 |
| O | -5.02035800  | -0.75560500 | 0.00529100  |
| C | -6.31875700  | -1.36950000 | 0.20836000  |
| H | -6.28318800  | -1.99031000 | 1.11061800  |
| H | -6.56042800  | -2.00469600 | -0.64793400 |
| C | -7.33577700  | -0.24941900 | 0.36224400  |
| H | -7.02416000  | 0.40624500  | 1.18430300  |
| H | -7.34226900  | 0.35334000  | -0.55319100 |
| C | -8.74783400  | -0.79422700 | 0.63824700  |
| H | -8.74012200  | -1.38194500 | 1.56263200  |
| H | -9.05113200  | -1.45117700 | -0.18507800 |
| C | -9.77137100  | 0.35324400  | 0.77001500  |
| O | -10.01653600 | 0.77831200  | 1.93751100  |
| O | -10.26938600 | 0.80221100  | -0.30439800 |

## 2-GHB-a'(5C)

|   |             |             |             |
|---|-------------|-------------|-------------|
| C | -2.78638000 | 6.37357700  | -0.18181100 |
| C | -1.70181200 | 5.28566900  | -0.18226800 |
| C | -2.22560500 | 3.98238200  | 0.41641400  |
| C | -3.47134600 | 3.48822600  | -0.33180100 |
| C | -4.56300100 | 4.57613100  | -0.30701500 |
| C | -4.05390600 | 5.89499800  | -0.90231400 |
| N | -3.94315200 | 2.23324300  | 0.25529600  |
| O | -1.14811100 | 3.00527400  | 0.31084800  |
| H | -3.69632700 | 2.08342100  | 1.23030700  |
| C | -0.99079800 | 2.10290700  | 1.29273600  |
| O | -1.76398100 | 1.98893100  | 2.23630200  |
| C | 0.21641500  | 1.25133000  | 1.10777700  |
| C | 0.43120500  | 0.20052100  | 2.00901500  |
| C | 1.54501900  | -0.62358200 | 1.87256400  |
| C | 2.46438700  | -0.40098600 | 0.83975200  |
| C | 2.25003500  | 0.64916800  | -0.06197800 |
| C | 1.13275800  | 1.47059700  | 0.06916200  |
| C | -4.57012300 | 1.24166900  | -0.40728900 |
| N | -4.98002600 | 0.22436000  | 0.43572500  |
| S | -4.86774100 | 1.27733600  | -2.07395900 |
| C | -5.46367100 | -1.05865800 | 0.16654000  |
| C | -6.25115400 | -1.66260900 | 1.16892000  |
| C | -6.73802700 | -2.94933400 | 1.01007600  |
| C | -6.43793300 | -3.64621600 | -0.16479100 |
| C | -5.64641100 | -3.07291100 | -1.16404500 |

|   |             |             |             |
|---|-------------|-------------|-------------|
| C | -5.15587800 | -1.78531100 | -0.99935500 |
| F | 2.21608200  | -3.17887400 | 0.23939500  |
| C | 3.32074100  | -2.54060300 | -0.20572600 |
| F | 4.31035500  | -3.45835400 | -0.25552200 |
| F | 3.07660400  | -2.14376400 | -1.47230800 |
| N | -6.95067700 | -4.99010600 | -0.34540700 |
| O | -6.69613900 | -5.58299100 | -1.40155500 |
| O | -7.62301800 | -5.49295200 | 0.56414200  |
| H | -2.39181100 | 7.27828000  | -0.65620600 |
| H | -3.03374300 | 6.64283000  | 0.85392000  |
| H | -1.36727900 | 5.09185300  | -1.20911700 |
| H | -0.82607500 | 5.60838400  | 0.38977200  |
| H | -4.88279000 | 4.73244300  | 0.73169500  |
| H | -5.43153000 | 4.20678200  | -0.86035800 |
| H | -4.83952800 | 6.65550900  | -0.83739900 |
| H | -3.83750500 | 5.75414700  | -1.97000700 |
| H | -0.27984300 | 0.03312400  | 2.80992500  |
| H | 1.69810700  | -1.44079600 | 2.56790600  |
| H | 2.96090300  | 0.82732100  | -0.85918200 |
| H | 0.97358000  | 2.28291600  | -0.62957900 |
| H | -5.01214200 | 0.47040400  | 1.41875000  |
| H | -6.48628800 | -1.11082600 | 2.07355000  |
| H | -7.34919800 | -3.40835600 | 1.77617300  |
| H | -5.40755800 | -3.63855900 | -2.05548000 |
| H | -4.53491100 | -1.34522700 | -1.76499700 |
| C | 3.68578000  | -1.31501900 | 0.69654300  |
| O | 4.06453500  | -1.90771600 | 1.91161900  |
| H | -2.45316600 | 4.11358600  | 1.47871300  |
| H | -3.19683900 | 3.27537600  | -1.36975400 |
| H | 4.21573200  | -1.20765500 | 2.56495000  |
| O | 4.69883700  | -0.54697200 | 0.11420000  |
| C | 6.02025000  | -1.12011100 | -0.05397500 |
| H | 6.02796400  | -1.74727300 | -0.95234100 |
| H | 6.25973300  | -1.74307400 | 0.81210300  |
| C | 7.00611900  | 0.02976600  | -0.19023100 |
| H | 6.70788500  | 0.66013800  | -1.03755300 |
| H | 6.95080700  | 0.65408800  | 0.71030100  |
| C | 8.44314000  | -0.46774100 | -0.39175400 |
| H | 8.48959300  | -1.10233100 | -1.28648600 |
| H | 8.73244500  | -1.09859600 | 0.45907300  |
| C | 9.45648100  | 0.68108900  | -0.53505300 |
| H | 9.40798100  | 1.31704100  | 0.35619600  |
| H | 9.18907500  | 1.29036900  | -1.40606100 |
| C | 10.89455700 | 0.15239800  | -0.70405700 |
| O | 11.28573400 | -0.09237100 | -1.88436700 |
| O | 11.57228400 | -0.02624500 | 0.35193000  |

## 2-GHB-a'(6C)

|   |             |            |             |
|---|-------------|------------|-------------|
| C | -2.73245500 | 6.41633600 | -0.07711200 |
| C | -1.70479900 | 5.27446100 | -0.05673500 |
| C | -2.31665600 | 3.98970900 | 0.49713400  |
| C | -3.55872100 | 3.57293000 | -0.30159700 |
| C | -4.59277300 | 4.71622800 | -0.29868900 |
| C | -3.99353600 | 6.01483700 | -0.85310900 |
| N | -4.11611200 | 2.33748000 | 0.25121900  |
| O | -1.28845300 | 2.95943600 | 0.40711500  |

|   |             |             |             |
|---|-------------|-------------|-------------|
| H | -3.91124700 | 2.16309700  | 1.23155600  |
| C | -1.20659300 | 2.03476900  | 1.37734000  |
| O | -2.00695700 | 1.95153500  | 2.30113500  |
| C | -0.04554900 | 1.11830500  | 1.20611900  |
| C | 0.11506100  | 0.07221500  | 2.12412300  |
| C | 1.18552700  | -0.80968900 | 2.00238500  |
| C | 2.11384800  | -0.65295200 | 0.96529700  |
| C | 1.95157700  | 0.39018200  | 0.04490400  |
| C | 0.87955800  | 1.27169200  | 0.16355800  |
| C | -4.78531700 | 1.39660200  | -0.44318400 |
| N | -5.28498600 | 0.39648700  | 0.37165300  |
| S | -5.02777900 | 1.47294000  | -2.11747900 |
| C | -5.85682000 | -0.84141700 | 0.06568100  |
| C | -6.72117400 | -1.39631500 | 1.03226900  |
| C | -7.30021500 | -2.63913600 | 0.83681100  |
| C | -7.01532100 | -3.34081000 | -0.33895600 |
| C | -6.14935400 | -2.81671900 | -1.30288400 |
| C | -5.56715600 | -1.57316400 | -1.10158400 |
| F | 1.73372600  | -3.44457500 | 0.47827700  |
| C | 2.85400500  | -2.86824600 | -0.01015200 |
| F | 3.80454800  | -3.82719700 | -0.04613300 |
| F | 2.60038800  | -2.50560300 | -1.28514000 |
| N | -7.62328000 | -4.63867400 | -0.55769900 |
| O | -7.37786100 | -5.23604900 | -1.61342900 |
| O | -8.36409500 | -5.09934300 | 0.32044500  |
| H | -2.27475500 | 7.30739500  | -0.51958900 |
| H | -3.00578400 | 6.68073600  | 0.95331000  |
| H | -1.34059500 | 5.08093300  | -1.07356800 |
| H | -0.83651900 | 5.54223100  | 0.55384900  |
| H | -4.94213800 | 4.87412100  | 0.73028400  |
| H | -5.45817000 | 4.40065200  | -0.88901600 |
| H | -4.74072000 | 6.81443500  | -0.80591000 |
| H | -3.74363000 | 5.87798400  | -1.91400100 |
| H | -0.60277700 | -0.04497900 | 2.92792300  |
| H | 1.29764000  | -1.62026800 | 2.71322000  |
| H | 2.66832100  | 0.51645300  | -0.75680000 |
| H | 0.76273800  | 2.07879400  | -0.54938200 |
| H | -5.33104300 | 0.62926300  | 1.35752200  |
| H | -6.94336500 | -0.83987500 | 1.93741300  |
| H | -7.97047000 | -3.05980300 | 1.57501400  |
| H | -5.92535500 | -3.38669000 | -2.19540900 |
| H | -4.88937000 | -1.17150700 | -1.83978000 |
| C | 3.28861600  | -1.62852400 | 0.84019600  |
| O | 3.65729900  | -2.19228000 | 2.07229200  |
| H | -2.57351900 | 4.11275700  | 1.55368700  |
| H | -3.25863800 | 3.35966800  | -1.33227100 |
| H | 3.84004700  | -1.47594700 | 2.69941600  |
| O | 4.32735300  | -0.93227300 | 0.21524500  |
| C | 5.61926000  | -1.56997500 | 0.05076100  |
| H | 5.59103800  | -2.21301200 | -0.83595300 |
| H | 5.83548800  | -2.18727500 | 0.92678900  |
| C | 6.65499600  | -0.46905500 | -0.11387900 |
| H | 6.36668700  | 0.16897600  | -0.95890400 |
| H | 6.64689000  | 0.16318700  | 0.78282700  |
| C | 8.06426200  | -1.02982300 | -0.34421600 |
| H | 8.06417300  | -1.66583200 | -1.24036500 |
| H | 8.34209000  | -1.67971100 | 0.49733400  |

|   |             |             |             |
|---|-------------|-------------|-------------|
| C | 9.12255000  | 0.06834100  | -0.50314500 |
| H | 9.12370100  | 0.70117100  | 0.39419700  |
| H | 8.84627000  | 0.71694700  | -1.34537800 |
| C | 10.54011500 | -0.48398300 | -0.73294500 |
| H | 10.54652000 | -1.09566900 | -1.64237300 |
| H | 10.81705100 | -1.12463500 | 0.11254600  |
| C | 11.57638200 | 0.64814900  | -0.87044400 |
| O | 12.08378100 | 1.09863200  | 0.20031700  |
| O | 11.82526600 | 1.06896900  | -2.04005200 |

## 2-GHB-a'(7C)

|   |             |             |             |
|---|-------------|-------------|-------------|
| C | -3.35852700 | 6.41936700  | -0.17179700 |
| C | -2.28601400 | 5.32076500  | -0.11594500 |
| C | -2.85543100 | 4.02246300  | 0.45082600  |
| C | -4.06334400 | 3.54266400  | -0.36564700 |
| C | -5.14430500 | 4.64065100  | -0.39898500 |
| C | -4.58984900 | 5.95565100  | -0.96158000 |
| N | -4.57876500 | 2.29096100  | 0.19030900  |
| O | -1.78773600 | 3.03119600  | 0.40073200  |
| H | -4.41384800 | 2.14983200  | 1.18336300  |
| C | -1.69412100 | 2.12726000  | 1.38959800  |
| O | -2.50470200 | 2.03868300  | 2.30369800  |
| C | -0.50687900 | 1.23919400  | 1.25096500  |
| C | -0.33540000 | 0.21112200  | 2.18713500  |
| C | 0.75532700  | -0.64895900 | 2.09272500  |
| C | 1.69366900  | -0.48760100 | 1.06551200  |
| C | 1.52221200  | 0.53925700  | 0.12853100  |
| C | 0.42944800  | 1.39837600  | 0.21934800  |
| C | -5.16415400 | 1.30068500  | -0.51173000 |
| N | -5.63942800 | 0.28867100  | 0.30210900  |
| S | -5.34110500 | 1.33284400  | -2.19578300 |
| C | -6.13121800 | -0.98448900 | 0.00144300  |
| C | -6.99443000 | -1.56962400 | 0.95122100  |
| C | -7.49768600 | -2.84583000 | 0.76171700  |
| C | -7.13734000 | -3.55093600 | -0.39107100 |
| C | -6.27092100 | -2.99654400 | -1.33739600 |
| C | -5.76449400 | -1.71929500 | -1.14196900 |
| F | 1.36530200  | -3.28280300 | 0.58582500  |
| C | 2.48708500  | -2.69441600 | 0.11568700  |
| F | 3.45074200  | -3.64068800 | 0.10473800  |
| F | 2.25384400  | -2.34335800 | -1.16644500 |
| N | -7.66660400 | -4.88384200 | -0.60394000 |
| O | -7.35608400 | -5.48455100 | -1.64043300 |
| O | -8.40850100 | -5.36954600 | 0.25965600  |
| H | -2.92982300 | 7.32125900  | -0.62133600 |
| H | -3.65940700 | 6.68864700  | 0.84963300  |
| H | -1.89776300 | 5.12513100  | -1.12342700 |
| H | -1.43958200 | 5.63423500  | 0.50348200  |
| H | -5.52082600 | 4.79787300  | 0.62042600  |
| H | -5.98388400 | 4.28066500  | -1.00124300 |
| H | -5.36979200 | 6.72433500  | -0.93736100 |
| H | -4.31701900 | 5.81488500  | -2.01629500 |
| H | -1.06192700 | 0.08954200  | 2.98243100  |
| H | 0.87449600  | -1.44711100 | 2.81637100  |
| H | 2.24702000  | 0.66956800  | -0.66530400 |
| H | 0.30439900  | 2.19176000  | -0.50750400 |

|   |             |             |             |
|---|-------------|-------------|-------------|
| H | -5.73198300 | 0.53457000  | 1.28125300  |
| H | -7.27569700 | -1.01094400 | 1.83842100  |
| H | -8.16692000 | -3.29031500 | 1.48675000  |
| H | -5.98754200 | -3.56857900 | -2.21154500 |
| H | -5.08686300 | -1.29328500 | -1.86646100 |
| C | 2.88718000  | -1.44315400 | 0.96639400  |
| O | 3.24457700  | -1.99426000 | 2.20743800  |
| H | -3.13899200 | 4.15491800  | 1.49937300  |
| H | -3.73402500 | 3.32877600  | -1.38700000 |
| H | 3.40801700  | -1.27170600 | 2.83274400  |
| O | 3.92457100  | -0.73224400 | 0.35555400  |
| C | 5.22736300  | -1.35247000 | 0.21206400  |
| H | 5.21734800  | -2.00870800 | -0.66527200 |
| H | 5.44445100  | -1.95378600 | 1.09902100  |
| C | 6.24919400  | -0.23971300 | 0.04044200  |
| H | 5.96259000  | 0.37933100  | -0.81919000 |
| H | 6.22206300  | 0.40798700  | 0.92566700  |
| C | 7.66786300  | -0.78646300 | -0.16337200 |
| H | 7.68348100  | -1.44475400 | -1.04316000 |
| H | 7.94504400  | -1.41243400 | 0.69634400  |
| C | 8.71636500  | 0.31823300  | -0.34153800 |
| H | 8.69823400  | 0.97963600  | 0.53628800  |
| H | 8.44165200  | 0.94240300  | -1.20376200 |
| C | 10.13761400 | -0.22094000 | -0.54050500 |
| H | 10.15644500 | -0.87952300 | -1.41871500 |
| H | 10.41185700 | -0.84201900 | 0.32366100  |
| C | 11.18898500 | 0.88799900  | -0.72087500 |
| H | 10.92248000 | 1.49290700  | -1.59623500 |
| H | 11.18319300 | 1.54137300  | 0.15875300  |
| C | 12.60356400 | 0.31106200  | -0.92156300 |
| O | 12.89390100 | -0.10644600 | -2.08288900 |
| O | 13.36708000 | 0.26882500  | 0.08976500  |
